# Supplementary material for: An Investigation into the Protein Composition of the Teneral Glossina morsitans morsitans Peritrophic Matrix
Source: PLoS Negl Trop Dis. 2014 Apr 24;8(4):e2691. doi: 10.1371/journal.pntd.0002691 (PMC3998921; doi:10.1371/journal.pntd.0002691)
Supplement: Table S3 — Glossina morsitans Mascot data. (XLS) [file pntd.0002691.s005.xls]

## Sheet: In Solution MASCOT output
Header	--------------------------------------------------------
Search title	181113_glos_in solution_10ppm
Timestamp	2013-11-18T15:59:09Z
User	Gemma Molyneux
Email	grmoly@liverpool.ac.uk
Report URI	http://lstmmaldi.liv.ac.uk/mascot/cgi/master_results.pl?file=../data/20131118/F002832.dat
Peak list data path	SOD_zip_1in5.mgf
Peak list format	Mascot generic
Search type	MIS
Mascot version	2.4.1
Database	140513_glossina
Fasta file	140513_glossina_.fasta
Total sequences	12457
Total residues	6887013
Sequences after taxonomy filter	12457
Number of queries	16209
Decoy	--------------------------------------------------------
Number of matches above identity threshold in search of real database	1108
Number of matches above identity threshold in search of decoy database	11
Number of matches above homology threshold in search of real database	1120
Number of matches above homology threshold in search of decoy database	11
Fixed modifications	--------------------------------------------------------
Identifier	Name	Delta	Neutral loss
1	Carbamidomethyl (C)	57.0215
Variable modifications	--------------------------------------------------------
Identifier	Name	Delta	Neutral loss(es)
1	Oxidation (M)	15.9949	0	63.9983
Search Parameters	--------------------------------------------------------
Taxonomy filter	All entries
Enzyme	Trypsin
Maximum Missed Cleavages	1
Fixed modifications	Carbamidomethyl (C)
Quantitation method	None
Variable modifications	Oxidation (M)
Peptide Mass Tolerance	10
Peptide Mass Tolerance Units	ppm
Fragment Mass Tolerance	0.6
Fragment Mass Tolerance Units	Da
Mass values	Monoisotopic
Instrument type	ESI-TRAP
Isotope error mode	0
Decoy database also searched	1
Format parameters	--------------------------------------------------------
Significance threshold	0.00495
Max. number of hits	0
Use MudPIT protein scoring	1
Ions score cut-off	30
Include same-set proteins	0
Include sub-set proteins	1
Include unassigned	0
Require bold red	0
Use homology threshold	0
Group protein families	1
Re-score using Percolator	0
Protein hits	--------------------------------------------------------
prot_hit_num	prot_family_member	prot_acc	prot_desc	prot_score	prot_mass	prot_matches	prot_matches_sig	prot_sequences	prot_sequences_sig	pep_query	pep_rank	pep_isbold	pep_isunique	pep_exp_mz	pep_exp_mr	pep_exp_z	pep_calc_mr	pep_delta	pep_miss	pep_score	pep_expect	pep_res_before	pep_seq	pep_res_after	pep_var_mod	pep_var_mod_pos	pep_summed_mod_pos	pep_scan_title
1	1	GMOY002708-PA	hypothetical protein|protein_coding|scf7180000644279:138091-144189:-1|gene:GMOY002708	14303	67871	388	388	10	10	2489	1	1	1	563.259	1124.5	2	1124.5	0.0001	1	32.05	0.0016	R	FVSSCAANRN	-				File43 Spectrum81 scans: 2611
1	1	GMOY002708-PA	hypothetical protein|protein_coding|scf7180000644279:138091-144189:-1|gene:GMOY002708	14303	67871	388	388	10	10	2490	1	1	1	563.259	1124.5	2	1124.5	0.001	1	41.42	0.00019	R	FVSSCAANRN	-				File43 Spectrum97 scans: 2665
1	1	GMOY002708-PA	hypothetical protein|protein_coding|scf7180000644279:138091-144189:-1|gene:GMOY002708	14303	67871	388	388	10	10	2491	1	1	1	563.26	1124.5	2	1124.5	0.0013	1	50.87	2.1e-05	R	FVSSCAANRN	-				File43 Spectrum124 scans: 2725
1	1	GMOY002708-PA	hypothetical protein|protein_coding|scf7180000644279:138091-144189:-1|gene:GMOY002708	14303	67871	388	388	10	10	2492	1	1	1	563.26	1124.5	2	1124.5	0.0013	1	54.66	8.9e-06	R	FVSSCAANRN	-				File43 Spectrum198 scans: 2901
1	1	GMOY002708-PA	hypothetical protein|protein_coding|scf7180000644279:138091-144189:-1|gene:GMOY002708	14303	67871	388	388	10	10	2493	1	1	1	563.26	1124.5	2	1124.5	0.0014	1	41.77	0.00017	R	FVSSCAANRN	-				File43 Spectrum146 scans: 2782
1	1	GMOY002708-PA	hypothetical protein|protein_coding|scf7180000644279:138091-144189:-1|gene:GMOY002708	14303	67871	388	388	10	10	2494	1	1	1	563.26	1124.51	2	1124.5	0.0017	1	43.88	0.00011	R	FVSSCAANRN	-				File43 Spectrum169 scans: 2839
1	1	GMOY002708-PA	hypothetical protein|protein_coding|scf7180000644279:138091-144189:-1|gene:GMOY002708	14303	67871	388	388	10	10	2953	1	1	1	587.753	1173.49	2	1173.49	0	0	36.42	0.00024	K	CPPGYYFDR	S				File43 Spectrum4138 scans: 7749
1	1	GMOY002708-PA	hypothetical protein|protein_coding|scf7180000644279:138091-144189:-1|gene:GMOY002708	14303	67871	388	388	10	10	4036	1	1	1	647.33	1292.65	2	1292.65	-0.0016	0	62.55	2.8e-06	R	SASICDLAVMVK	C				File43 Spectrum7510 scans: 11668
1	1	GMOY002708-PA	hypothetical protein|protein_coding|scf7180000644279:138091-144189:-1|gene:GMOY002708	14303	67871	388	388	10	10	4037	1	1	1	647.33	1292.65	2	1292.65	-0.0012	0	50.75	4.2e-05	R	SASICDLAVMVK	C				File43 Spectrum7746 scans: 11949
1	1	GMOY002708-PA	hypothetical protein|protein_coding|scf7180000644279:138091-144189:-1|gene:GMOY002708	14303	67871	388	388	10	10	4038	1	1	1	647.331	1292.65	2	1292.65	0.0007	0	68.85	6.5e-07	R	SASICDLAVMVK	C				File43 Spectrum7586 scans: 11759
1	1	GMOY002708-PA	hypothetical protein|protein_coding|scf7180000644279:138091-144189:-1|gene:GMOY002708	14303	67871	388	388	10	10	4039	1	1	1	647.332	1292.65	2	1292.65	0.002	0	65.26	1.7e-06	R	SASICDLAVMVK	C				File43 Spectrum7667 scans: 11854
1	1	GMOY002708-PA	hypothetical protein|protein_coding|scf7180000644279:138091-144189:-1|gene:GMOY002708	14303	67871	388	388	10	10	4041	1	1	1	647.337	1292.66	2	1292.65	0.0117	0	36.33	0.0011	R	SASICDLAVMVK	C				File43 Spectrum7921 scans: 12155
1	1	GMOY002708-PA	hypothetical protein|protein_coding|scf7180000644279:138091-144189:-1|gene:GMOY002708	14303	67871	388	388	10	10	5383	1	1	1	733.33	1464.65	2	1464.65	-0.0005	0	46.93	4.8e-05	R	CPLGQWYDGDVR	S				File43 Spectrum5845 scans: 9736
1	1	GMOY002708-PA	hypothetical protein|protein_coding|scf7180000644279:138091-144189:-1|gene:GMOY002708	14303	67871	388	388	10	10	5385	1	1	1	733.33	1464.65	2	1464.65	0.0005	0	63.31	1.1e-06	R	CPLGQWYDGDVR	S				File43 Spectrum5930 scans: 9836
1	1	GMOY002708-PA	hypothetical protein|protein_coding|scf7180000644279:138091-144189:-1|gene:GMOY002708	14303	67871	388	388	10	10	5386	1	1	1	733.331	1464.65	2	1464.65	0.0018	0	51.62	1.7e-05	R	CPLGQWYDGDVR	S				File43 Spectrum6481 scans: 10484
1	1	GMOY002708-PA	hypothetical protein|protein_coding|scf7180000644279:138091-144189:-1|gene:GMOY002708	14303	67871	388	388	10	10	5387	1	1	1	733.331	1464.65	2	1464.65	0.0019	0	52.78	1.3e-05	R	CPLGQWYDGDVR	S				File43 Spectrum6403 scans: 10390
1	1	GMOY002708-PA	hypothetical protein|protein_coding|scf7180000644279:138091-144189:-1|gene:GMOY002708	14303	67871	388	388	10	10	5388	1	1	1	733.331	1464.65	2	1464.65	0.0026	0	50.98	2.1e-05	R	CPLGQWYDGDVR	S				File43 Spectrum6585 scans: 10602
1	1	GMOY002708-PA	hypothetical protein|protein_coding|scf7180000644279:138091-144189:-1|gene:GMOY002708	14303	67871	388	388	10	10	5389	1	1	1	733.332	1464.65	2	1464.65	0.003	0	49.66	2.5e-05	R	CPLGQWYDGDVR	S				File43 Spectrum6234 scans: 10192
1	1	GMOY002708-PA	hypothetical protein|protein_coding|scf7180000644279:138091-144189:-1|gene:GMOY002708	14303	67871	388	388	10	10	5390	1	1	1	733.332	1464.65	2	1464.65	0.0032	0	56.28	5.8e-06	R	CPLGQWYDGDVR	S				File43 Spectrum6315 scans: 10289
1	1	GMOY002708-PA	hypothetical protein|protein_coding|scf7180000644279:138091-144189:-1|gene:GMOY002708	14303	67871	388	388	10	10	5657	1	1	1	748.333	1494.65	2	1494.66	-0.0048	0	38.39	0.00028	R	CPLGQWYDSDVR	L				File43 Spectrum6221 scans: 10174
1	1	GMOY002708-PA	hypothetical protein|protein_coding|scf7180000644279:138091-144189:-1|gene:GMOY002708	14303	67871	388	388	10	10	5658	1	1	1	748.333	1494.65	2	1494.66	-0.0045	0	40.7	0.00016	R	CPLGQWYDSDVR	L				File43 Spectrum15832 scans: 22736
1	1	GMOY002708-PA	hypothetical protein|protein_coding|scf7180000644279:138091-144189:-1|gene:GMOY002708	14303	67871	388	388	10	10	5659	1	1	1	748.334	1494.65	2	1494.66	-0.0035	0	44.93	5.9e-05	R	CPLGQWYDSDVR	L				File43 Spectrum6033 scans: 9954
1	1	GMOY002708-PA	hypothetical protein|protein_coding|scf7180000644279:138091-144189:-1|gene:GMOY002708	14303	67871	388	388	10	10	5662	1	1	1	748.335	1494.66	2	1494.66	-0.0008	0	68.21	3.9e-07	R	CPLGQWYDSDVR	L				File43 Spectrum6376 scans: 10359
1	1	GMOY002708-PA	hypothetical protein|protein_coding|scf7180000644279:138091-144189:-1|gene:GMOY002708	14303	67871	388	388	10	10	5663	1	1	1	748.335	1494.66	2	1494.66	-0.0003	0	52.33	1.5e-05	R	CPLGQWYDSDVR	L				File43 Spectrum7011 scans: 11088
1	1	GMOY002708-PA	hypothetical protein|protein_coding|scf7180000644279:138091-144189:-1|gene:GMOY002708	14303	67871	388	388	10	10	5664	1	1	1	748.335	1494.66	2	1494.66	0.0001	0	66.61	5.6e-07	R	CPLGQWYDSDVR	L				File43 Spectrum6545 scans: 10557
1	1	GMOY002708-PA	hypothetical protein|protein_coding|scf7180000644279:138091-144189:-1|gene:GMOY002708	14303	67871	388	388	10	10	5665	1	1	1	748.336	1494.66	2	1494.66	0.0007	0	65.56	6.7e-07	R	CPLGQWYDSDVR	L				File43 Spectrum6458 scans: 10455
1	1	GMOY002708-PA	hypothetical protein|protein_coding|scf7180000644279:138091-144189:-1|gene:GMOY002708	14303	67871	388	388	10	10	5666	1	1	1	748.336	1494.66	2	1494.66	0.001	0	62.45	1.3e-06	R	CPLGQWYDSDVR	L				File43 Spectrum6637 scans: 10662
1	1	GMOY002708-PA	hypothetical protein|protein_coding|scf7180000644279:138091-144189:-1|gene:GMOY002708	14303	67871	388	388	10	10	5667	1	1	1	748.336	1494.66	2	1494.66	0.001	0	64.2	8.9e-07	R	CPLGQWYDSDVR	L				File43 Spectrum6817 scans: 10868
1	1	GMOY002708-PA	hypothetical protein|protein_coding|scf7180000644279:138091-144189:-1|gene:GMOY002708	14303	67871	388	388	10	10	5668	1	1	1	748.336	1494.66	2	1494.66	0.001	0	64.25	8.8e-07	R	CPLGQWYDSDVR	L				File43 Spectrum5777 scans: 9655
1	1	GMOY002708-PA	hypothetical protein|protein_coding|scf7180000644279:138091-144189:-1|gene:GMOY002708	14303	67871	388	388	10	10	5669	1	1	1	499.227	1494.66	3	1494.66	0.0019	0	30.35	0.0022	R	CPLGQWYDSDVR	L				File43 Spectrum6293 scans: 10262
1	1	GMOY002708-PA	hypothetical protein|protein_coding|scf7180000644279:138091-144189:-1|gene:GMOY002708	14303	67871	388	388	10	10	5670	1	1	1	748.336	1494.66	2	1494.66	0.0019	0	62.65	1.3e-06	R	CPLGQWYDSDVR	L				File43 Spectrum5854 scans: 9747
1	1	GMOY002708-PA	hypothetical protein|protein_coding|scf7180000644279:138091-144189:-1|gene:GMOY002708	14303	67871	388	388	10	10	5671	1	1	1	748.336	1494.66	2	1494.66	0.002	0	62.89	1.2e-06	R	CPLGQWYDSDVR	L				File43 Spectrum5942 scans: 9849
1	1	GMOY002708-PA	hypothetical protein|protein_coding|scf7180000644279:138091-144189:-1|gene:GMOY002708	14303	67871	388	388	10	10	5672	1	1	1	748.336	1494.66	2	1494.66	0.0021	0	52.31	1.4e-05	R	CPLGQWYDSDVR	L				File43 Spectrum6922 scans: 10986
1	1	GMOY002708-PA	hypothetical protein|protein_coding|scf7180000644279:138091-144189:-1|gene:GMOY002708	14303	67871	388	388	10	10	5673	1	1	1	748.336	1494.66	2	1494.66	0.0021	0	42.7	0.00013	R	CPLGQWYDSDVR	L				File43 Spectrum15781 scans: 22603
1	1	GMOY002708-PA	hypothetical protein|protein_coding|scf7180000644279:138091-144189:-1|gene:GMOY002708	14303	67871	388	388	10	10	5674	1	1	1	748.337	1494.66	2	1494.66	0.0024	0	64.81	7.9e-07	R	CPLGQWYDSDVR	L				File43 Spectrum6292 scans: 10261
1	1	GMOY002708-PA	hypothetical protein|protein_coding|scf7180000644279:138091-144189:-1|gene:GMOY002708	14303	67871	388	388	10	10	5675	1	1	1	748.337	1494.66	2	1494.66	0.0029	0	55.57	6.8e-06	R	CPLGQWYDSDVR	L				File43 Spectrum6732 scans: 10769
1	1	GMOY002708-PA	hypothetical protein|protein_coding|scf7180000644279:138091-144189:-1|gene:GMOY002708	14303	67871	388	388	10	10	7823	1	1	1	584.935	1751.78	3	1751.79	-0.0029	1	30.16	0.0019	R	MRCPLGQWYDGDVR	S				File43 Spectrum14586 scans: 20776
1	1	GMOY002708-PA	hypothetical protein|protein_coding|scf7180000644279:138091-144189:-1|gene:GMOY002708	14303	67871	388	388	10	10	7824	1	1	1	584.936	1751.79	3	1751.79	-0.0022	1	32.81	0.0011	R	MRCPLGQWYDGDVR	S				File43 Spectrum12569 scans: 17883
1	1	GMOY002708-PA	hypothetical protein|protein_coding|scf7180000644279:138091-144189:-1|gene:GMOY002708	14303	67871	388	388	10	10	7825	1	1	1	584.936	1751.79	3	1751.79	-0.002	1	31.83	0.0013	R	MRCPLGQWYDGDVR	S				File43 Spectrum12695 scans: 18061
1	1	GMOY002708-PA	hypothetical protein|protein_coding|scf7180000644279:138091-144189:-1|gene:GMOY002708	14303	67871	388	388	10	10	7826	1	1	1	584.936	1751.79	3	1751.79	-0.0018	1	42.03	0.00013	R	MRCPLGQWYDGDVR	S				File43 Spectrum13084 scans: 18604
1	1	GMOY002708-PA	hypothetical protein|protein_coding|scf7180000644279:138091-144189:-1|gene:GMOY002708	14303	67871	388	388	10	10	7827	1	1	1	584.936	1751.79	3	1751.79	-0.0017	1	36.14	0.0005	R	MRCPLGQWYDGDVR	S				File43 Spectrum12201 scans: 17384
1	1	GMOY002708-PA	hypothetical protein|protein_coding|scf7180000644279:138091-144189:-1|gene:GMOY002708	14303	67871	388	388	10	10	7828	1	1	1	584.936	1751.79	3	1751.79	-0.0015	1	36.5	0.00045	R	MRCPLGQWYDGDVR	S				File43 Spectrum13752 scans: 19564
1	1	GMOY002708-PA	hypothetical protein|protein_coding|scf7180000644279:138091-144189:-1|gene:GMOY002708	14303	67871	388	388	10	10	7829	1	1	1	584.936	1751.79	3	1751.79	-0.0013	1	38.83	0.00026	R	MRCPLGQWYDGDVR	S				File43 Spectrum12330 scans: 17558
1	1	GMOY002708-PA	hypothetical protein|protein_coding|scf7180000644279:138091-144189:-1|gene:GMOY002708	14303	67871	388	388	10	10	7830	1	1	1	584.936	1751.79	3	1751.79	-0.0011	1	44.46	7.2e-05	R	MRCPLGQWYDGDVR	S				File43 Spectrum14702 scans: 20951
1	1	GMOY002708-PA	hypothetical protein|protein_coding|scf7180000644279:138091-144189:-1|gene:GMOY002708	14303	67871	388	388	10	10	7831	1	1	1	584.936	1751.79	3	1751.79	-0.0009	1	38.45	0.00029	R	MRCPLGQWYDGDVR	S				File43 Spectrum12451 scans: 17719
1	1	GMOY002708-PA	hypothetical protein|protein_coding|scf7180000644279:138091-144189:-1|gene:GMOY002708	14303	67871	388	388	10	10	7833	1	1	1	584.936	1751.79	3	1751.79	-0.0004	1	36.74	0.00044	R	MRCPLGQWYDGDVR	S				File43 Spectrum13865 scans: 19726
1	1	GMOY002708-PA	hypothetical protein|protein_coding|scf7180000644279:138091-144189:-1|gene:GMOY002708	14303	67871	388	388	10	10	7837	1	1	1	584.936	1751.79	3	1751.79	-0.0002	1	41.22	0.00016	R	MRCPLGQWYDGDVR	S				File43 Spectrum14180 scans: 20175
1	1	GMOY002708-PA	hypothetical protein|protein_coding|scf7180000644279:138091-144189:-1|gene:GMOY002708	14303	67871	388	388	10	10	7838	1	1	1	584.936	1751.79	3	1751.79	0	1	48.11	3.2e-05	R	MRCPLGQWYDGDVR	S				File43 Spectrum13315 scans: 18936
1	1	GMOY002708-PA	hypothetical protein|protein_coding|scf7180000644279:138091-144189:-1|gene:GMOY002708	14303	67871	388	388	10	10	7839	1	1	1	584.936	1751.79	3	1751.79	0	1	34.38	0.00077	R	MRCPLGQWYDGDVR	S				File43 Spectrum14809 scans: 21119
1	1	GMOY002708-PA	hypothetical protein|protein_coding|scf7180000644279:138091-144189:-1|gene:GMOY002708	14303	67871	388	388	10	10	7840	1	1	1	584.936	1751.79	3	1751.79	0	1	37.33	0.00039	R	MRCPLGQWYDGDVR	S				File43 Spectrum12036 scans: 17161
1	1	GMOY002708-PA	hypothetical protein|protein_coding|scf7180000644279:138091-144189:-1|gene:GMOY002708	14303	67871	388	388	10	10	7841	1	1	1	584.937	1751.79	3	1751.79	0.0004	1	34.85	0.0007	R	MRCPLGQWYDGDVR	S				File43 Spectrum14363 scans: 20441
1	1	GMOY002708-PA	hypothetical protein|protein_coding|scf7180000644279:138091-144189:-1|gene:GMOY002708	14303	67871	388	388	10	10	7842	1	1	1	584.937	1751.79	3	1751.79	0.0004	1	31.72	0.0014	R	MRCPLGQWYDGDVR	S				File43 Spectrum13471 scans: 19166
1	1	GMOY002708-PA	hypothetical protein|protein_coding|scf7180000644279:138091-144189:-1|gene:GMOY002708	14303	67871	388	388	10	10	7844	1	1	1	584.937	1751.79	3	1751.79	0.0004	1	35.99	0.00054	R	MRCPLGQWYDGDVR	S				File43 Spectrum14748 scans: 21023
1	1	GMOY002708-PA	hypothetical protein|protein_coding|scf7180000644279:138091-144189:-1|gene:GMOY002708	14303	67871	388	388	10	10	7845	1	1	1	584.937	1751.79	3	1751.79	0.0007	1	32.25	0.0013	R	MRCPLGQWYDGDVR	S				File43 Spectrum12750 scans: 18141
1	1	GMOY002708-PA	hypothetical protein|protein_coding|scf7180000644279:138091-144189:-1|gene:GMOY002708	14303	67871	388	388	10	10	7846	1	1	1	584.937	1751.79	3	1751.79	0.0007	1	30.17	0.0021	R	MRCPLGQWYDGDVR	S				File43 Spectrum13642 scans: 19406
1	1	GMOY002708-PA	hypothetical protein|protein_coding|scf7180000644279:138091-144189:-1|gene:GMOY002708	14303	67871	388	388	10	10	7848	1	1	1	584.937	1751.79	3	1751.79	0.0009	1	31.78	0.0014	R	MRCPLGQWYDGDVR	S				File43 Spectrum14230 scans: 20248
1	1	GMOY002708-PA	hypothetical protein|protein_coding|scf7180000644279:138091-144189:-1|gene:GMOY002708	14303	67871	388	388	10	10	7849	1	1	1	584.937	1751.79	3	1751.79	0.0009	1	34.35	0.00079	R	MRCPLGQWYDGDVR	S				File43 Spectrum11564 scans: 16538
1	1	GMOY002708-PA	hypothetical protein|protein_coding|scf7180000644279:138091-144189:-1|gene:GMOY002708	14303	67871	388	388	10	10	7850	1	1	1	584.937	1751.79	3	1751.79	0.0011	1	32.03	0.0013	R	MRCPLGQWYDGDVR	S				File43 Spectrum14019 scans: 19943
1	1	GMOY002708-PA	hypothetical protein|protein_coding|scf7180000644279:138091-144189:-1|gene:GMOY002708	14303	67871	388	388	10	10	7852	1	1	1	584.937	1751.79	3	1751.79	0.0013	1	42.72	0.00011	R	MRCPLGQWYDGDVR	S				File43 Spectrum12272 scans: 17479
1	1	GMOY002708-PA	hypothetical protein|protein_coding|scf7180000644279:138091-144189:-1|gene:GMOY002708	14303	67871	388	388	10	10	7853	1	1	1	584.937	1751.79	3	1751.79	0.0015	1	34.3	0.00078	R	MRCPLGQWYDGDVR	S				File43 Spectrum13150 scans: 18695
1	1	GMOY002708-PA	hypothetical protein|protein_coding|scf7180000644279:138091-144189:-1|gene:GMOY002708	14303	67871	388	388	10	10	7855	1	1	1	584.937	1751.79	3	1751.79	0.0015	1	38.58	0.00029	R	MRCPLGQWYDGDVR	S				File43 Spectrum14411 scans: 20516
1	1	GMOY002708-PA	hypothetical protein|protein_coding|scf7180000644279:138091-144189:-1|gene:GMOY002708	14303	67871	388	388	10	10	7856	1	1	1	584.937	1751.79	3	1751.79	0.0015	1	50.38	1.9e-05	R	MRCPLGQWYDGDVR	S				File43 Spectrum14282 scans: 20322
1	1	GMOY002708-PA	hypothetical protein|protein_coding|scf7180000644279:138091-144189:-1|gene:GMOY002708	14303	67871	388	388	10	10	7858	1	1	1	584.937	1751.79	3	1751.79	0.0016	1	52.74	1.1e-05	R	MRCPLGQWYDGDVR	S				File43 Spectrum14077 scans: 20025
1	1	GMOY002708-PA	hypothetical protein|protein_coding|scf7180000644279:138091-144189:-1|gene:GMOY002708	14303	67871	388	388	10	10	7859	1	1	1	584.937	1751.79	3	1751.79	0.0016	1	32.21	0.0012	R	MRCPLGQWYDGDVR	S				File43 Spectrum13588 scans: 19328
1	1	GMOY002708-PA	hypothetical protein|protein_coding|scf7180000644279:138091-144189:-1|gene:GMOY002708	14303	67871	388	388	10	10	7861	1	1	1	584.937	1751.79	3	1751.79	0.0018	1	42.32	0.00012	R	MRCPLGQWYDGDVR	S				File43 Spectrum12864 scans: 18303
1	1	GMOY002708-PA	hypothetical protein|protein_coding|scf7180000644279:138091-144189:-1|gene:GMOY002708	14303	67871	388	388	10	10	7862	1	1	1	584.937	1751.79	3	1751.79	0.002	1	31.7	0.0014	R	MRCPLGQWYDGDVR	S				File43 Spectrum12152 scans: 17314
1	1	GMOY002708-PA	hypothetical protein|protein_coding|scf7180000644279:138091-144189:-1|gene:GMOY002708	14303	67871	388	388	10	10	7864	1	1	1	584.937	1751.79	3	1751.79	0.002	1	31.16	0.0016	R	MRCPLGQWYDGDVR	S				File43 Spectrum14964 scans: 21357
1	1	GMOY002708-PA	hypothetical protein|protein_coding|scf7180000644279:138091-144189:-1|gene:GMOY002708	14303	67871	388	388	10	10	7865	1	1	1	584.937	1751.79	3	1751.79	0.0022	1	44.57	7.2e-05	R	MRCPLGQWYDGDVR	S				File43 Spectrum12956 scans: 18428
1	1	GMOY002708-PA	hypothetical protein|protein_coding|scf7180000644279:138091-144189:-1|gene:GMOY002708	14303	67871	388	388	10	10	7866	1	1	1	584.937	1751.79	3	1751.79	0.0024	1	42.23	0.00012	R	MRCPLGQWYDGDVR	S				File43 Spectrum12389 scans: 17638
1	1	GMOY002708-PA	hypothetical protein|protein_coding|scf7180000644279:138091-144189:-1|gene:GMOY002708	14303	67871	388	388	10	10	7867	1	1	1	584.937	1751.79	3	1751.79	0.0024	1	46.45	4.6e-05	R	MRCPLGQWYDGDVR	S				File43 Spectrum13373 scans: 19017
1	1	GMOY002708-PA	hypothetical protein|protein_coding|scf7180000644279:138091-144189:-1|gene:GMOY002708	14303	67871	388	388	10	10	7868	1	1	1	584.937	1751.79	3	1751.79	0.0024	1	35.56	0.00057	R	MRCPLGQWYDGDVR	S				File43 Spectrum11632 scans: 16626
1	1	GMOY002708-PA	hypothetical protein|protein_coding|scf7180000644279:138091-144189:-1|gene:GMOY002708	14303	67871	388	388	10	10	7869	1	1	1	584.937	1751.79	3	1751.79	0.0024	1	41.95	0.00013	R	MRCPLGQWYDGDVR	S				File43 Spectrum13421 scans: 19091
1	1	GMOY002708-PA	hypothetical protein|protein_coding|scf7180000644279:138091-144189:-1|gene:GMOY002708	14303	67871	388	388	10	10	7870	1	1	1	584.937	1751.79	3	1751.79	0.0025	1	52.18	1.2e-05	R	MRCPLGQWYDGDVR	S				File43 Spectrum12808 scans: 18224
1	1	GMOY002708-PA	hypothetical protein|protein_coding|scf7180000644279:138091-144189:-1|gene:GMOY002708	14303	67871	388	388	10	10	7871	1	1	1	584.937	1751.79	3	1751.79	0.0025	1	52.22	1.2e-05	R	MRCPLGQWYDGDVR	S				File43 Spectrum14129 scans: 20100
1	1	GMOY002708-PA	hypothetical protein|protein_coding|scf7180000644279:138091-144189:-1|gene:GMOY002708	14303	67871	388	388	10	10	7872	1	1	1	584.937	1751.79	3	1751.79	0.0025	1	35.59	0.00057	R	MRCPLGQWYDGDVR	S				File43 Spectrum13202 scans: 18769
1	1	GMOY002708-PA	hypothetical protein|protein_coding|scf7180000644279:138091-144189:-1|gene:GMOY002708	14303	67871	388	388	10	10	7873	1	1	1	584.937	1751.79	3	1751.79	0.0025	1	34.64	0.0007	R	MRCPLGQWYDGDVR	S				File43 Spectrum14658 scans: 20881
1	1	GMOY002708-PA	hypothetical protein|protein_coding|scf7180000644279:138091-144189:-1|gene:GMOY002708	14303	67871	388	388	10	10	7875	1	1	1	584.938	1751.79	3	1751.79	0.0037	1	31.54	0.0017	R	MRCPLGQWYDGDVR	S				File43 Spectrum13259 scans: 18851
1	1	GMOY002708-PA	hypothetical protein|protein_coding|scf7180000644279:138091-144189:-1|gene:GMOY002708	14303	67871	388	388	10	10	7878	1	1	1	584.939	1751.79	3	1751.79	0.007	1	31.89	0.0016	R	MRCPLGQWYDGDVR	S				File43 Spectrum12091 scans: 17234
1	1	GMOY002708-PA	hypothetical protein|protein_coding|scf7180000644279:138091-144189:-1|gene:GMOY002708	14303	67871	388	388	10	10	8230	1	1	1	594.939	1781.8	3	1781.8	-0.0018	1	34.11	0.00082	R	MRCPLGQWYDSDVR	L				File43 Spectrum13701 scans: 19491
1	1	GMOY002708-PA	hypothetical protein|protein_coding|scf7180000644279:138091-144189:-1|gene:GMOY002708	14303	67871	388	388	10	10	8232	1	1	1	594.939	1781.8	3	1781.8	-0.0016	1	33.84	0.00087	R	MRCPLGQWYDSDVR	L				File43 Spectrum14707 scans: 20959
1	1	GMOY002708-PA	hypothetical protein|protein_coding|scf7180000644279:138091-144189:-1|gene:GMOY002708	14303	67871	388	388	10	10	8233	1	1	1	594.939	1781.8	3	1781.8	-0.0016	1	34.33	0.00077	R	MRCPLGQWYDSDVR	L				File43 Spectrum10930 scans: 15745
1	1	GMOY002708-PA	hypothetical protein|protein_coding|scf7180000644279:138091-144189:-1|gene:GMOY002708	14303	67871	388	388	10	10	8234	1	1	1	594.939	1781.8	3	1781.8	-0.0014	1	32.81	0.0011	R	MRCPLGQWYDSDVR	L				File43 Spectrum13073 scans: 18589
1	1	GMOY002708-PA	hypothetical protein|protein_coding|scf7180000644279:138091-144189:-1|gene:GMOY002708	14303	67871	388	388	10	10	8244	1	1	1	594.94	1781.8	3	1781.8	-0.0007	1	37.28	0.00037	R	MRCPLGQWYDSDVR	L				File43 Spectrum12578 scans: 17896
1	1	GMOY002708-PA	hypothetical protein|protein_coding|scf7180000644279:138091-144189:-1|gene:GMOY002708	14303	67871	388	388	10	10	8245	1	1	1	594.94	1781.8	3	1781.8	-0.0007	1	32.27	0.0012	R	MRCPLGQWYDSDVR	L				File43 Spectrum13489 scans: 19191
1	1	GMOY002708-PA	hypothetical protein|protein_coding|scf7180000644279:138091-144189:-1|gene:GMOY002708	14303	67871	388	388	10	10	8247	1	1	1	594.94	1781.8	3	1781.8	-0.0005	1	30.03	0.002	R	MRCPLGQWYDSDVR	L				File43 Spectrum15165 scans: 21660
1	1	GMOY002708-PA	hypothetical protein|protein_coding|scf7180000644279:138091-144189:-1|gene:GMOY002708	14303	67871	388	388	10	10	8248	1	1	1	594.94	1781.8	3	1781.8	-0.0003	1	34.64	0.00069	R	MRCPLGQWYDSDVR	L				File43 Spectrum11669 scans: 16677
1	1	GMOY002708-PA	hypothetical protein|protein_coding|scf7180000644279:138091-144189:-1|gene:GMOY002708	14303	67871	388	388	10	10	8249	1	1	1	594.94	1781.8	3	1781.8	-0.0003	1	41.87	0.00013	R	MRCPLGQWYDSDVR	L				File43 Spectrum13284 scans: 18889
1	1	GMOY002708-PA	hypothetical protein|protein_coding|scf7180000644279:138091-144189:-1|gene:GMOY002708	14303	67871	388	388	10	10	8251	1	1	1	594.94	1781.8	3	1781.8	-0.0003	1	48.85	2.6e-05	R	MRCPLGQWYDSDVR	L				File43 Spectrum15545 scans: 22228
1	1	GMOY002708-PA	hypothetical protein|protein_coding|scf7180000644279:138091-144189:-1|gene:GMOY002708	14303	67871	388	388	10	10	8252	1	1	1	594.94	1781.8	3	1781.8	-0.0003	1	30.22	0.0019	R	MRCPLGQWYDSDVR	L				File43 Spectrum15027 scans: 21450
1	1	GMOY002708-PA	hypothetical protein|protein_coding|scf7180000644279:138091-144189:-1|gene:GMOY002708	14303	67871	388	388	10	10	8253	1	1	1	594.94	1781.8	3	1781.8	-0.0001	1	34.22	0.00078	R	MRCPLGQWYDSDVR	L				File43 Spectrum11611 scans: 16600
1	1	GMOY002708-PA	hypothetical protein|protein_coding|scf7180000644279:138091-144189:-1|gene:GMOY002708	14303	67871	388	388	10	10	8254	1	1	1	594.94	1781.8	3	1781.8	-0.0001	1	32.86	0.0011	R	MRCPLGQWYDSDVR	L				File43 Spectrum14521 scans: 20677
1	1	GMOY002708-PA	hypothetical protein|protein_coding|scf7180000644279:138091-144189:-1|gene:GMOY002708	14303	67871	388	388	10	10	8255	1	1	1	594.94	1781.8	3	1781.8	-0.0001	1	36.04	0.00051	R	MRCPLGQWYDSDVR	L				File43 Spectrum14226 scans: 20242
1	1	GMOY002708-PA	hypothetical protein|protein_coding|scf7180000644279:138091-144189:-1|gene:GMOY002708	14303	67871	388	388	10	10	8256	1	1	1	594.94	1781.8	3	1781.8	-0.0001	1	31.28	0.0015	R	MRCPLGQWYDSDVR	L				File43 Spectrum14751 scans: 21028
1	1	GMOY002708-PA	hypothetical protein|protein_coding|scf7180000644279:138091-144189:-1|gene:GMOY002708	14303	67871	388	388	10	10	8258	1	1	1	594.94	1781.8	3	1781.8	0.0001	1	38.01	0.00033	R	MRCPLGQWYDSDVR	L				File43 Spectrum13012 scans: 18506
1	1	GMOY002708-PA	hypothetical protein|protein_coding|scf7180000644279:138091-144189:-1|gene:GMOY002708	14303	67871	388	388	10	10	8260	1	1	1	594.94	1781.8	3	1781.8	0.0001	1	33.04	0.001	R	MRCPLGQWYDSDVR	L				File43 Spectrum11910 scans: 16993
1	1	GMOY002708-PA	hypothetical protein|protein_coding|scf7180000644279:138091-144189:-1|gene:GMOY002708	14303	67871	388	388	10	10	8261	1	1	1	594.94	1781.8	3	1781.8	0.0001	1	35.32	0.00062	R	MRCPLGQWYDSDVR	L				File43 Spectrum12953 scans: 18425
1	1	GMOY002708-PA	hypothetical protein|protein_coding|scf7180000644279:138091-144189:-1|gene:GMOY002708	14303	67871	388	388	10	10	8262	1	1	1	594.94	1781.8	3	1781.8	0.0001	1	35.69	0.00057	R	MRCPLGQWYDSDVR	L				File43 Spectrum11004 scans: 15834
1	1	GMOY002708-PA	hypothetical protein|protein_coding|scf7180000644279:138091-144189:-1|gene:GMOY002708	14303	67871	388	388	10	10	8265	1	1	1	594.94	1781.8	3	1781.8	0.0002	1	34.71	0.00071	R	MRCPLGQWYDSDVR	L				File43 Spectrum12083 scans: 17223
1	1	GMOY002708-PA	hypothetical protein|protein_coding|scf7180000644279:138091-144189:-1|gene:GMOY002708	14303	67871	388	388	10	10	8266	1	1	1	594.94	1781.8	3	1781.8	0.0002	1	34.28	0.00078	R	MRCPLGQWYDSDVR	L				File43 Spectrum11732 scans: 16758
1	1	GMOY002708-PA	hypothetical protein|protein_coding|scf7180000644279:138091-144189:-1|gene:GMOY002708	14303	67871	388	388	10	10	8270	1	1	1	594.94	1781.8	3	1781.8	0.0004	1	34.7	0.00071	R	MRCPLGQWYDSDVR	L				File43 Spectrum14177 scans: 20170
1	1	GMOY002708-PA	hypothetical protein|protein_coding|scf7180000644279:138091-144189:-1|gene:GMOY002708	14303	67871	388	388	10	10	8271	1	1	1	594.94	1781.8	3	1781.8	0.0004	1	34.68	0.00071	R	MRCPLGQWYDSDVR	L				File43 Spectrum11964 scans: 17067
1	1	GMOY002708-PA	hypothetical protein|protein_coding|scf7180000644279:138091-144189:-1|gene:GMOY002708	14303	67871	388	388	10	10	8273	1	1	1	594.94	1781.8	3	1781.8	0.0004	1	35.31	0.00062	R	MRCPLGQWYDSDVR	L				File43 Spectrum13133 scans: 18669
1	1	GMOY002708-PA	hypothetical protein|protein_coding|scf7180000644279:138091-144189:-1|gene:GMOY002708	14303	67871	388	388	10	10	8274	1	1	1	594.94	1781.8	3	1781.8	0.0004	1	31.67	0.0014	R	MRCPLGQWYDSDVR	L				File43 Spectrum11416 scans: 16350
1	1	GMOY002708-PA	hypothetical protein|protein_coding|scf7180000644279:138091-144189:-1|gene:GMOY002708	14303	67871	388	388	10	10	8277	1	1	1	594.94	1781.8	3	1781.8	0.0006	1	32.4	0.0013	R	MRCPLGQWYDSDVR	L				File43 Spectrum12250 scans: 17449
1	1	GMOY002708-PA	hypothetical protein|protein_coding|scf7180000644279:138091-144189:-1|gene:GMOY002708	14303	67871	388	388	10	10	8281	1	1	1	594.94	1781.8	3	1781.8	0.0006	1	46.81	4.6e-05	R	MRCPLGQWYDSDVR	L				File43 Spectrum13233 scans: 18814
1	1	GMOY002708-PA	hypothetical protein|protein_coding|scf7180000644279:138091-144189:-1|gene:GMOY002708	14303	67871	388	388	10	10	8282	1	1	1	594.94	1781.8	3	1781.8	0.0006	1	34.49	0.00078	R	MRCPLGQWYDSDVR	L				File43 Spectrum14073 scans: 20021
1	1	GMOY002708-PA	hypothetical protein|protein_coding|scf7180000644279:138091-144189:-1|gene:GMOY002708	14303	67871	388	388	10	10	8283	1	1	1	594.94	1781.8	3	1781.8	0.0006	1	38.41	0.00032	R	MRCPLGQWYDSDVR	L				File43 Spectrum13182 scans: 18740
1	1	GMOY002708-PA	hypothetical protein|protein_coding|scf7180000644279:138091-144189:-1|gene:GMOY002708	14303	67871	388	388	10	10	8284	1	1	1	594.94	1781.8	3	1781.8	0.0006	1	38.27	0.00033	R	MRCPLGQWYDSDVR	L				File43 Spectrum12025 scans: 17146
1	1	GMOY002708-PA	hypothetical protein|protein_coding|scf7180000644279:138091-144189:-1|gene:GMOY002708	14303	67871	388	388	10	10	8285	1	1	1	594.94	1781.8	3	1781.8	0.0006	1	38.43	0.00032	R	MRCPLGQWYDSDVR	L				File43 Spectrum13805 scans: 19641
1	1	GMOY002708-PA	hypothetical protein|protein_coding|scf7180000644279:138091-144189:-1|gene:GMOY002708	14303	67871	388	388	10	10	8286	1	1	1	594.94	1781.8	3	1781.8	0.0006	1	34.66	0.00075	R	MRCPLGQWYDSDVR	L				File43 Spectrum13546 scans: 19268
1	1	GMOY002708-PA	hypothetical protein|protein_coding|scf7180000644279:138091-144189:-1|gene:GMOY002708	14303	67871	388	388	10	10	8288	1	1	1	594.94	1781.8	3	1781.8	0.0006	1	37.22	0.00042	R	MRCPLGQWYDSDVR	L				File43 Spectrum14617 scans: 20820
1	1	GMOY002708-PA	hypothetical protein|protein_coding|scf7180000644279:138091-144189:-1|gene:GMOY002708	14303	67871	388	388	10	10	8289	1	1	1	594.94	1781.8	3	1781.8	0.0006	1	31.14	0.0017	R	MRCPLGQWYDSDVR	L				File43 Spectrum13754 scans: 19567
1	1	GMOY002708-PA	hypothetical protein|protein_coding|scf7180000644279:138091-144189:-1|gene:GMOY002708	14303	67871	388	388	10	10	8290	1	1	1	594.94	1781.8	3	1781.8	0.0006	1	31.11	0.0017	R	MRCPLGQWYDSDVR	L				File43 Spectrum14664 scans: 20890
1	1	GMOY002708-PA	hypothetical protein|protein_coding|scf7180000644279:138091-144189:-1|gene:GMOY002708	14303	67871	388	388	10	10	8292	1	1	1	594.94	1781.8	3	1781.8	0.0008	1	37.8	0.00037	R	MRCPLGQWYDSDVR	L				File43 Spectrum13648 scans: 19416
1	1	GMOY002708-PA	hypothetical protein|protein_coding|scf7180000644279:138091-144189:-1|gene:GMOY002708	14303	67871	388	388	10	10	8293	1	1	1	594.94	1781.8	3	1781.8	0.0008	1	42.24	0.00013	R	MRCPLGQWYDSDVR	L				File43 Spectrum13858 scans: 19717
1	1	GMOY002708-PA	hypothetical protein|protein_coding|scf7180000644279:138091-144189:-1|gene:GMOY002708	14303	67871	388	388	10	10	8294	1	1	1	594.94	1781.8	3	1781.8	0.0008	1	36.89	0.00045	R	MRCPLGQWYDSDVR	L				File43 Spectrum13388 scans: 19040
1	1	GMOY002708-PA	hypothetical protein|protein_coding|scf7180000644279:138091-144189:-1|gene:GMOY002708	14303	67871	388	388	10	10	8297	1	1	1	594.94	1781.8	3	1781.8	0.0008	1	36.04	0.00055	R	MRCPLGQWYDSDVR	L				File43 Spectrum11549 scans: 16520
1	1	GMOY002708-PA	hypothetical protein|protein_coding|scf7180000644279:138091-144189:-1|gene:GMOY002708	14303	67871	388	388	10	10	8298	1	1	1	594.94	1781.8	3	1781.8	0.0008	1	37.43	0.0004	R	MRCPLGQWYDSDVR	L				File43 Spectrum15305 scans: 21871
1	1	GMOY002708-PA	hypothetical protein|protein_coding|scf7180000644279:138091-144189:-1|gene:GMOY002708	14303	67871	388	388	10	10	8299	1	1	1	594.94	1781.8	3	1781.8	0.0008	1	32.04	0.0014	R	MRCPLGQWYDSDVR	L				File43 Spectrum11073 scans: 15919
1	1	GMOY002708-PA	hypothetical protein|protein_coding|scf7180000644279:138091-144189:-1|gene:GMOY002708	14303	67871	388	388	10	10	8301	1	1	1	594.94	1781.8	3	1781.8	0.0008	1	41.08	0.00017	R	MRCPLGQWYDSDVR	L				File43 Spectrum15212 scans: 21731
1	1	GMOY002708-PA	hypothetical protein|protein_coding|scf7180000644279:138091-144189:-1|gene:GMOY002708	14303	67871	388	388	10	10	8302	1	1	1	594.94	1781.8	3	1781.8	0.001	1	36.36	0.00052	R	MRCPLGQWYDSDVR	L				File43 Spectrum12301 scans: 17521
1	1	GMOY002708-PA	hypothetical protein|protein_coding|scf7180000644279:138091-144189:-1|gene:GMOY002708	14303	67871	388	388	10	10	8304	1	1	1	594.94	1781.8	3	1781.8	0.001	1	39.55	0.00025	R	MRCPLGQWYDSDVR	L				File43 Spectrum11857 scans: 16920
1	1	GMOY002708-PA	hypothetical protein|protein_coding|scf7180000644279:138091-144189:-1|gene:GMOY002708	14303	67871	388	388	10	10	8305	1	1	1	594.94	1781.8	3	1781.8	0.001	1	37.21	0.00043	R	MRCPLGQWYDSDVR	L				File43 Spectrum14840 scans: 21167
1	1	GMOY002708-PA	hypothetical protein|protein_coding|scf7180000644279:138091-144189:-1|gene:GMOY002708	14303	67871	388	388	10	10	8306	1	1	1	594.94	1781.8	3	1781.8	0.001	1	41.99	0.00014	R	MRCPLGQWYDSDVR	L				File43 Spectrum15404 scans: 22014
1	1	GMOY002708-PA	hypothetical protein|protein_coding|scf7180000644279:138091-144189:-1|gene:GMOY002708	14303	67871	388	388	10	10	8307	1	1	1	594.94	1781.8	3	1781.8	0.0012	1	34.98	0.00071	R	MRCPLGQWYDSDVR	L				File43 Spectrum13598 scans: 19343
1	1	GMOY002708-PA	hypothetical protein|protein_coding|scf7180000644279:138091-144189:-1|gene:GMOY002708	14303	67871	388	388	10	10	8308	1	1	1	594.94	1781.8	3	1781.8	0.0012	1	48	3.6e-05	R	MRCPLGQWYDSDVR	L				File43 Spectrum14374 scans: 20460
1	1	GMOY002708-PA	hypothetical protein|protein_coding|scf7180000644279:138091-144189:-1|gene:GMOY002708	14303	67871	388	388	10	10	8310	1	1	1	594.94	1781.8	3	1781.8	0.0012	1	30.8	0.0019	R	MRCPLGQWYDSDVR	L				File43 Spectrum14887 scans: 21238
1	1	GMOY002708-PA	hypothetical protein|protein_coding|scf7180000644279:138091-144189:-1|gene:GMOY002708	14303	67871	388	388	10	10	8316	1	1	1	594.94	1781.8	3	1781.8	0.0013	1	39.15	0.00027	R	MRCPLGQWYDSDVR	L				File43 Spectrum13439 scans: 19116
1	1	GMOY002708-PA	hypothetical protein|protein_coding|scf7180000644279:138091-144189:-1|gene:GMOY002708	14303	67871	388	388	10	10	8318	1	1	1	594.94	1781.8	3	1781.8	0.0013	1	36.76	0.00046	R	MRCPLGQWYDSDVR	L				File43 Spectrum12141 scans: 17300
1	1	GMOY002708-PA	hypothetical protein|protein_coding|scf7180000644279:138091-144189:-1|gene:GMOY002708	14303	67871	388	388	10	10	8319	1	1	1	594.94	1781.8	3	1781.8	0.0015	1	30.94	0.0018	R	MRCPLGQWYDSDVR	L				File43 Spectrum12192 scans: 17372
1	1	GMOY002708-PA	hypothetical protein|protein_coding|scf7180000644279:138091-144189:-1|gene:GMOY002708	14303	67871	388	388	10	10	8321	1	1	1	594.94	1781.8	3	1781.8	0.0015	1	30.54	0.0019	R	MRCPLGQWYDSDVR	L				File43 Spectrum13913 scans: 19793
1	1	GMOY002708-PA	hypothetical protein|protein_coding|scf7180000644279:138091-144189:-1|gene:GMOY002708	14303	67871	388	388	10	10	8322	1	1	1	594.94	1781.8	3	1781.8	0.0015	1	31.33	0.0016	R	MRCPLGQWYDSDVR	L				File43 Spectrum14929 scans: 21306
1	1	GMOY002708-PA	hypothetical protein|protein_coding|scf7180000644279:138091-144189:-1|gene:GMOY002708	14303	67871	388	388	10	10	8323	1	1	1	594.94	1781.8	3	1781.8	0.0015	1	36.31	0.00051	R	MRCPLGQWYDSDVR	L				File43 Spectrum14569 scans: 20749
1	1	GMOY002708-PA	hypothetical protein|protein_coding|scf7180000644279:138091-144189:-1|gene:GMOY002708	14303	67871	388	388	10	10	8324	1	1	1	594.94	1781.8	3	1781.8	0.0015	1	39.38	0.00025	R	MRCPLGQWYDSDVR	L				File43 Spectrum15498 scans: 22157
1	1	GMOY002708-PA	hypothetical protein|protein_coding|scf7180000644279:138091-144189:-1|gene:GMOY002708	14303	67871	388	388	10	10	8326	1	1	1	594.94	1781.8	3	1781.8	0.0017	1	30.42	0.002	R	MRCPLGQWYDSDVR	L				File43 Spectrum13334 scans: 18963
1	1	GMOY002708-PA	hypothetical protein|protein_coding|scf7180000644279:138091-144189:-1|gene:GMOY002708	14303	67871	388	388	10	10	8327	1	1	1	594.94	1781.8	3	1781.8	0.0017	1	38.83	0.00029	R	MRCPLGQWYDSDVR	L				File43 Spectrum12357 scans: 17596
1	1	GMOY002708-PA	hypothetical protein|protein_coding|scf7180000644279:138091-144189:-1|gene:GMOY002708	14303	67871	388	388	10	10	8328	1	1	1	594.94	1781.8	3	1781.8	0.0017	1	45.87	5.7e-05	R	MRCPLGQWYDSDVR	L				File43 Spectrum14328 scans: 20389
1	1	GMOY002708-PA	hypothetical protein|protein_coding|scf7180000644279:138091-144189:-1|gene:GMOY002708	14303	67871	388	388	10	10	8330	1	1	1	594.941	1781.8	3	1781.8	0.0021	1	40.04	0.00022	R	MRCPLGQWYDSDVR	L				File43 Spectrum14472 scans: 20606
1	1	GMOY002708-PA	hypothetical protein|protein_coding|scf7180000644279:138091-144189:-1|gene:GMOY002708	14303	67871	388	388	10	10	8334	1	1	1	594.941	1781.8	3	1781.8	0.0024	1	43.55	9.9e-05	R	MRCPLGQWYDSDVR	L				File43 Spectrum11797 scans: 16841
1	1	GMOY002708-PA	hypothetical protein|protein_coding|scf7180000644279:138091-144189:-1|gene:GMOY002708	14303	67871	388	388	10	10	8418	1	1	1	600.27	1797.79	3	1797.79	-0.0046	1	37.86	0.00024	R	MRCPLGQWYDSDVR	L	Oxidation (M)	0.10000000000000.0		File43 Spectrum15380 scans: 21977
1	1	GMOY002708-PA	hypothetical protein|protein_coding|scf7180000644279:138091-144189:-1|gene:GMOY002708	14303	67871	388	388	10	10	8419	1	1	1	600.27	1797.79	3	1797.79	-0.0039	1	30.26	0.0015	R	MRCPLGQWYDSDVR	L	Oxidation (M)	0.10000000000000.0		File43 Spectrum14473 scans: 20608
1	1	GMOY002708-PA	hypothetical protein|protein_coding|scf7180000644279:138091-144189:-1|gene:GMOY002708	14303	67871	388	388	10	10	8436	1	1	1	600.271	1797.79	3	1797.79	-0.0013	1	31.08	0.0013	R	MRCPLGQWYDSDVR	L	Oxidation (M)	0.10000000000000.0		File43 Spectrum15329 scans: 21904
1	1	GMOY002708-PA	hypothetical protein|protein_coding|scf7180000644279:138091-144189:-1|gene:GMOY002708	14303	67871	388	388	10	10	8438	1	1	1	600.271	1797.79	3	1797.79	-0.0011	1	35.8	0.00043	R	MRCPLGQWYDSDVR	L	Oxidation (M)	0.10000000000000.0		File43 Spectrum13206 scans: 18777
1	1	GMOY002708-PA	hypothetical protein|protein_coding|scf7180000644279:138091-144189:-1|gene:GMOY002708	14303	67871	388	388	10	10	8442	1	1	1	600.271	1797.79	3	1797.79	-0.0011	1	35.17	0.0005	R	MRCPLGQWYDSDVR	L	Oxidation (M)	0.10000000000000.0		File43 Spectrum11480 scans: 16433
1	1	GMOY002708-PA	hypothetical protein|protein_coding|scf7180000644279:138091-144189:-1|gene:GMOY002708	14303	67871	388	388	10	10	8450	1	1	1	600.271	1797.79	3	1797.79	-0.0006	1	38.6	0.00023	R	MRCPLGQWYDSDVR	L	Oxidation (M)	0.10000000000000.0		File43 Spectrum16171 scans: 23807
1	1	GMOY002708-PA	hypothetical protein|protein_coding|scf7180000644279:138091-144189:-1|gene:GMOY002708	14303	67871	388	388	10	10	8455	1	1	1	600.271	1797.79	3	1797.79	-0.0002	1	31.82	0.0011	R	MRCPLGQWYDSDVR	L	Oxidation (M)	0.10000000000000.0		File43 Spectrum15342 scans: 21922
1	1	GMOY002708-PA	hypothetical protein|protein_coding|scf7180000644279:138091-144189:-1|gene:GMOY002708	14303	67871	388	388	10	10	8458	1	1	1	600.271	1797.79	3	1797.79	-0.0001	1	34.31	0.00063	R	MRCPLGQWYDSDVR	L	Oxidation (M)	0.10000000000000.0		File43 Spectrum13042 scans: 18543
1	1	GMOY002708-PA	hypothetical protein|protein_coding|scf7180000644279:138091-144189:-1|gene:GMOY002708	14303	67871	388	388	10	10	8462	1	1	1	600.272	1797.79	3	1797.79	0.0001	1	31.64	0.0012	R	MRCPLGQWYDSDVR	L	Oxidation (M)	0.10000000000000.0		File43 Spectrum13797 scans: 19629
1	1	GMOY002708-PA	hypothetical protein|protein_coding|scf7180000644279:138091-144189:-1|gene:GMOY002708	14303	67871	388	388	10	10	8463	1	1	1	600.272	1797.79	3	1797.79	0.0001	1	53.43	7.7e-06	R	MRCPLGQWYDSDVR	L	Oxidation (M)	0.10000000000000.0		File43 Spectrum15133 scans: 21615
1	1	GMOY002708-PA	hypothetical protein|protein_coding|scf7180000644279:138091-144189:-1|gene:GMOY002708	14303	67871	388	388	10	10	8477	1	1	1	600.272	1797.79	3	1797.79	0.0007	1	36.15	0.00042	R	MRCPLGQWYDSDVR	L	Oxidation (M)	0.10000000000000.0		File43 Spectrum15276 scans: 21829
1	1	GMOY002708-PA	hypothetical protein|protein_coding|scf7180000644279:138091-144189:-1|gene:GMOY002708	14303	67871	388	388	10	10	8478	1	1	1	600.272	1797.79	3	1797.79	0.0007	1	31.06	0.0014	R	MRCPLGQWYDSDVR	L	Oxidation (M)	0.10000000000000.0		File43 Spectrum12861 scans: 18299
1	1	GMOY002708-PA	hypothetical protein|protein_coding|scf7180000644279:138091-144189:-1|gene:GMOY002708	14303	67871	388	388	10	10	8483	1	1	1	600.272	1797.79	3	1797.79	0.001	1	47.33	3.2e-05	R	MRCPLGQWYDSDVR	L	Oxidation (M)	0.10000000000000.0		File43 Spectrum14674 scans: 20905
1	1	GMOY002708-PA	hypothetical protein|protein_coding|scf7180000644279:138091-144189:-1|gene:GMOY002708	14303	67871	388	388	10	10	8484	1	1	1	600.272	1797.79	3	1797.79	0.001	1	31.28	0.0013	R	MRCPLGQWYDSDVR	L	Oxidation (M)	0.10000000000000.0		File43 Spectrum11344 scans: 16260
1	1	GMOY002708-PA	hypothetical protein|protein_coding|scf7180000644279:138091-144189:-1|gene:GMOY002708	14303	67871	388	388	10	10	8495	1	1	1	600.272	1797.79	3	1797.79	0.002	1	41.28	0.00013	R	MRCPLGQWYDSDVR	L	Oxidation (M)	0.10000000000000.0		File43 Spectrum14807 scans: 21116
1	1	GMOY002708-PA	hypothetical protein|protein_coding|scf7180000644279:138091-144189:-1|gene:GMOY002708	14303	67871	388	388	10	10	8498	1	1	1	600.272	1797.8	3	1797.79	0.0023	1	30.55	0.0015	R	MRCPLGQWYDSDVR	L	Oxidation (M)	0.10000000000000.0		File43 Spectrum10297 scans: 14960
1	1	GMOY002708-PA	hypothetical protein|protein_coding|scf7180000644279:138091-144189:-1|gene:GMOY002708	14303	67871	388	388	10	10	8504	1	1	1	600.273	1797.8	3	1797.79	0.0029	1	30.03	0.0017	R	MRCPLGQWYDSDVR	L	Oxidation (M)	0.10000000000000.0		File43 Spectrum15486 scans: 22138
1	1	GMOY002708-PA	hypothetical protein|protein_coding|scf7180000644279:138091-144189:-1|gene:GMOY002708	14303	67871	388	388	10	10	8509	1	1	1	600.273	1797.8	3	1797.79	0.0036	1	34.04	0.00067	R	MRCPLGQWYDSDVR	L	Oxidation (M)	0.10000000000000.0		File43 Spectrum13158 scans: 18706
1	1	GMOY002708-PA	hypothetical protein|protein_coding|scf7180000644279:138091-144189:-1|gene:GMOY002708	14303	67871	388	388	10	10	8510	1	1	1	600.273	1797.8	3	1797.79	0.0036	1	31.58	0.0012	R	MRCPLGQWYDSDVR	L	Oxidation (M)	0.10000000000000.0		File43 Spectrum11193 scans: 16068
1	1	GMOY002708-PA	hypothetical protein|protein_coding|scf7180000644279:138091-144189:-1|gene:GMOY002708	14303	67871	388	388	10	10	8513	1	1	1	600.273	1797.8	3	1797.79	0.0049	1	34.21	0.00066	R	MRCPLGQWYDSDVR	L	Oxidation (M)	0.10000000000000.0		File43 Spectrum12374 scans: 17619
1	1	GMOY002708-PA	hypothetical protein|protein_coding|scf7180000644279:138091-144189:-1|gene:GMOY002708	14303	67871	388	388	10	10	8514	1	1	1	600.273	1797.8	3	1797.79	0.0056	1	41.12	0.00014	R	MRCPLGQWYDSDVR	L	Oxidation (M)	0.10000000000000.0		File43 Spectrum11282 scans: 16178
1	1	GMOY002708-PA	hypothetical protein|protein_coding|scf7180000644279:138091-144189:-1|gene:GMOY002708	14303	67871	388	388	10	10	8822	1	1	1	613.63	1837.87	3	1837.87	-0.0051	0	52.3	2.3e-05	R	SSDCSSLTDGTILLDVR	H				File43 Spectrum8339 scans: 12663
1	1	GMOY002708-PA	hypothetical protein|protein_coding|scf7180000644279:138091-144189:-1|gene:GMOY002708	14303	67871	388	388	10	10	8824	1	1	1	919.941	1837.87	2	1837.87	-0.0049	0	156.63	8.4e-16	R	SSDCSSLTDGTILLDVR	H				File43 Spectrum8250 scans: 12542
1	1	GMOY002708-PA	hypothetical protein|protein_coding|scf7180000644279:138091-144189:-1|gene:GMOY002708	14303	67871	388	388	10	10	8825	1	1	1	613.63	1837.87	3	1837.87	-0.0048	0	42.03	0.00024	R	SSDCSSLTDGTILLDVR	H				File43 Spectrum8286 scans: 12588
1	1	GMOY002708-PA	hypothetical protein|protein_coding|scf7180000644279:138091-144189:-1|gene:GMOY002708	14303	67871	388	388	10	10	8831	1	1	1	919.942	1837.87	2	1837.87	-0.0037	0	88.07	5.8e-09	R	SSDCSSLTDGTILLDVR	H				File43 Spectrum7468 scans: 11615
1	1	GMOY002708-PA	hypothetical protein|protein_coding|scf7180000644279:138091-144189:-1|gene:GMOY002708	14303	67871	388	388	10	10	8836	1	1	1	919.942	1837.87	2	1837.87	-0.0026	0	148.58	5.5e-15	R	SSDCSSLTDGTILLDVR	H				File43 Spectrum8367 scans: 12701
1	1	GMOY002708-PA	hypothetical protein|protein_coding|scf7180000644279:138091-144189:-1|gene:GMOY002708	14303	67871	388	388	10	10	8838	1	1	1	919.942	1837.87	2	1837.87	-0.0024	0	95.17	1.2e-09	R	SSDCSSLTDGTILLDVR	H				File43 Spectrum11207 scans: 16086
1	1	GMOY002708-PA	hypothetical protein|protein_coding|scf7180000644279:138091-144189:-1|gene:GMOY002708	14303	67871	388	388	10	10	8842	1	1	1	919.943	1837.87	2	1837.87	-0.0022	0	102.22	2.4e-10	R	SSDCSSLTDGTILLDVR	H				File43 Spectrum14533 scans: 20696
1	1	GMOY002708-PA	hypothetical protein|protein_coding|scf7180000644279:138091-144189:-1|gene:GMOY002708	14303	67871	388	388	10	10	8843	1	1	1	919.943	1837.87	2	1837.87	-0.0021	0	124.85	1.3e-12	R	SSDCSSLTDGTILLDVR	H				File43 Spectrum8313 scans: 12625
1	1	GMOY002708-PA	hypothetical protein|protein_coding|scf7180000644279:138091-144189:-1|gene:GMOY002708	14303	67871	388	388	10	10	8844	1	1	1	919.943	1837.87	2	1837.87	-0.0021	0	125.18	1.2e-12	R	SSDCSSLTDGTILLDVR	H				File43 Spectrum14432 scans: 20549
1	1	GMOY002708-PA	hypothetical protein|protein_coding|scf7180000644279:138091-144189:-1|gene:GMOY002708	14303	67871	388	388	10	10	8849	1	1	1	613.631	1837.87	3	1837.87	-0.0017	0	52.33	2.4e-05	R	SSDCSSLTDGTILLDVR	H				File43 Spectrum7883 scans: 12109
1	1	GMOY002708-PA	hypothetical protein|protein_coding|scf7180000644279:138091-144189:-1|gene:GMOY002708	14303	67871	388	388	10	10	8850	1	1	1	919.943	1837.87	2	1837.87	-0.0016	0	111.9	2.6e-11	R	SSDCSSLTDGTILLDVR	H				File43 Spectrum12706 scans: 18078
1	1	GMOY002708-PA	hypothetical protein|protein_coding|scf7180000644279:138091-144189:-1|gene:GMOY002708	14303	67871	388	388	10	10	8851	1	1	1	919.943	1837.87	2	1837.87	-0.0015	0	143.47	1.8e-14	R	SSDCSSLTDGTILLDVR	H				File43 Spectrum15828 scans: 22713
1	1	GMOY002708-PA	hypothetical protein|protein_coding|scf7180000644279:138091-144189:-1|gene:GMOY002708	14303	67871	388	388	10	10	8852	1	1	1	919.943	1837.87	2	1837.87	-0.0015	0	91.48	2.9e-09	R	SSDCSSLTDGTILLDVR	H				File43 Spectrum12448 scans: 17716
1	1	GMOY002708-PA	hypothetical protein|protein_coding|scf7180000644279:138091-144189:-1|gene:GMOY002708	14303	67871	388	388	10	10	8853	1	1	1	919.943	1837.87	2	1837.87	-0.0015	0	108.66	5.5e-11	R	SSDCSSLTDGTILLDVR	H				File43 Spectrum14725 scans: 20985
1	1	GMOY002708-PA	hypothetical protein|protein_coding|scf7180000644279:138091-144189:-1|gene:GMOY002708	14303	67871	388	388	10	10	8856	1	1	1	919.943	1837.87	2	1837.87	-0.0012	0	134	1.6e-13	R	SSDCSSLTDGTILLDVR	H				File43 Spectrum12332 scans: 17561
1	1	GMOY002708-PA	hypothetical protein|protein_coding|scf7180000644279:138091-144189:-1|gene:GMOY002708	14303	67871	388	388	10	10	8858	1	1	1	919.943	1837.87	2	1837.87	-0.0011	0	126.02	1e-12	R	SSDCSSLTDGTILLDVR	H				File43 Spectrum9532 scans: 14048
1	1	GMOY002708-PA	hypothetical protein|protein_coding|scf7180000644279:138091-144189:-1|gene:GMOY002708	14303	67871	388	388	10	10	8859	1	1	1	919.943	1837.87	2	1837.87	-0.001	0	108.08	6.3e-11	R	SSDCSSLTDGTILLDVR	H				File43 Spectrum16042 scans: 23548
1	1	GMOY002708-PA	hypothetical protein|protein_coding|scf7180000644279:138091-144189:-1|gene:GMOY002708	14303	67871	388	388	10	10	8860	1	1	1	919.943	1837.87	2	1837.87	-0.001	0	140.75	3.4e-14	R	SSDCSSLTDGTILLDVR	H				File43 Spectrum15705 scans: 22459
1	1	GMOY002708-PA	hypothetical protein|protein_coding|scf7180000644279:138091-144189:-1|gene:GMOY002708	14303	67871	388	388	10	10	8861	1	1	1	919.943	1837.87	2	1837.87	-0.001	0	108.79	5.4e-11	R	SSDCSSLTDGTILLDVR	H				File43 Spectrum12658 scans: 18008
1	1	GMOY002708-PA	hypothetical protein|protein_coding|scf7180000644279:138091-144189:-1|gene:GMOY002708	14303	67871	388	388	10	10	8862	1	1	1	919.943	1837.87	2	1837.87	-0.001	0	93.6	1.8e-09	R	SSDCSSLTDGTILLDVR	H				File43 Spectrum13973 scans: 19877
1	1	GMOY002708-PA	hypothetical protein|protein_coding|scf7180000644279:138091-144189:-1|gene:GMOY002708	14303	67871	388	388	10	10	8865	1	1	1	919.943	1837.87	2	1837.87	-0.0008	0	140.35	3.7e-14	R	SSDCSSLTDGTILLDVR	H				File43 Spectrum10637 scans: 15378
1	1	GMOY002708-PA	hypothetical protein|protein_coding|scf7180000644279:138091-144189:-1|gene:GMOY002708	14303	67871	388	388	10	10	8866	1	1	1	919.943	1837.87	2	1837.87	-0.0008	0	108.93	5.2e-11	R	SSDCSSLTDGTILLDVR	H				File43 Spectrum13762 scans: 19577
1	1	GMOY002708-PA	hypothetical protein|protein_coding|scf7180000644279:138091-144189:-1|gene:GMOY002708	14303	67871	388	388	10	10	8871	1	1	1	919.943	1837.87	2	1837.87	-0.0007	0	140.72	3.4e-14	R	SSDCSSLTDGTILLDVR	H				File43 Spectrum16072 scans: 23611
1	1	GMOY002708-PA	hypothetical protein|protein_coding|scf7180000644279:138091-144189:-1|gene:GMOY002708	14303	67871	388	388	10	10	8872	1	1	1	919.943	1837.87	2	1837.87	-0.0006	0	110.05	4e-11	R	SSDCSSLTDGTILLDVR	H				File43 Spectrum9618 scans: 14152
1	1	GMOY002708-PA	hypothetical protein|protein_coding|scf7180000644279:138091-144189:-1|gene:GMOY002708	14303	67871	388	388	10	10	8873	1	1	1	919.943	1837.87	2	1837.87	-0.0006	0	86.97	8.1e-09	R	SSDCSSLTDGTILLDVR	H				File43 Spectrum12387 scans: 17636
1	1	GMOY002708-PA	hypothetical protein|protein_coding|scf7180000644279:138091-144189:-1|gene:GMOY002708	14303	67871	388	388	10	10	8874	1	1	1	919.943	1837.87	2	1837.87	-0.0006	0	108.78	5.4e-11	R	SSDCSSLTDGTILLDVR	H				File43 Spectrum12553 scans: 17861
1	1	GMOY002708-PA	hypothetical protein|protein_coding|scf7180000644279:138091-144189:-1|gene:GMOY002708	14303	67871	388	388	10	10	8875	1	1	1	919.943	1837.87	2	1837.87	-0.0006	0	97.62	7e-10	R	SSDCSSLTDGTILLDVR	H				File43 Spectrum11485 scans: 16440
1	1	GMOY002708-PA	hypothetical protein|protein_coding|scf7180000644279:138091-144189:-1|gene:GMOY002708	14303	67871	388	388	10	10	8876	1	1	1	919.943	1837.87	2	1837.87	-0.0006	0	96.39	9.3e-10	R	SSDCSSLTDGTILLDVR	H				File43 Spectrum14676 scans: 20910
1	1	GMOY002708-PA	hypothetical protein|protein_coding|scf7180000644279:138091-144189:-1|gene:GMOY002708	14303	67871	388	388	10	10	8877	1	1	1	919.943	1837.87	2	1837.87	-0.0006	0	102.35	2.4e-10	R	SSDCSSLTDGTILLDVR	H				File43 Spectrum13864 scans: 19725
1	1	GMOY002708-PA	hypothetical protein|protein_coding|scf7180000644279:138091-144189:-1|gene:GMOY002708	14303	67871	388	388	10	10	8879	1	1	1	919.943	1837.87	2	1837.87	-0.0005	0	67.29	7.6e-07	R	SSDCSSLTDGTILLDVR	H				File43 Spectrum15747 scans: 22527
1	1	GMOY002708-PA	hypothetical protein|protein_coding|scf7180000644279:138091-144189:-1|gene:GMOY002708	14303	67871	388	388	10	10	8880	1	1	1	919.943	1837.87	2	1837.87	-0.0005	0	96.56	8.9e-10	R	SSDCSSLTDGTILLDVR	H				File43 Spectrum15328 scans: 21903
1	1	GMOY002708-PA	hypothetical protein|protein_coding|scf7180000644279:138091-144189:-1|gene:GMOY002708	14303	67871	388	388	10	10	8881	1	1	1	919.943	1837.87	2	1837.87	-0.0005	0	120.06	4e-12	R	SSDCSSLTDGTILLDVR	H				File43 Spectrum10910 scans: 15719
1	1	GMOY002708-PA	hypothetical protein|protein_coding|scf7180000644279:138091-144189:-1|gene:GMOY002708	14303	67871	388	388	10	10	8882	1	1	1	919.943	1837.87	2	1837.87	-0.0005	0	128.7	5.5e-13	R	SSDCSSLTDGTILLDVR	H				File43 Spectrum11617 scans: 16608
1	1	GMOY002708-PA	hypothetical protein|protein_coding|scf7180000644279:138091-144189:-1|gene:GMOY002708	14303	67871	388	388	10	10	8883	1	1	1	613.631	1837.87	3	1837.87	-0.0004	0	67.56	7.1e-07	R	SSDCSSLTDGTILLDVR	H				File43 Spectrum8407 scans: 12749
1	1	GMOY002708-PA	hypothetical protein|protein_coding|scf7180000644279:138091-144189:-1|gene:GMOY002708	14303	67871	388	388	10	10	8887	1	1	1	919.943	1837.87	2	1837.87	-0.0004	0	79.33	4.7e-08	R	SSDCSSLTDGTILLDVR	H				File43 Spectrum14213 scans: 20220
1	1	GMOY002708-PA	hypothetical protein|protein_coding|scf7180000644279:138091-144189:-1|gene:GMOY002708	14303	67871	388	388	10	10	8888	1	1	1	919.943	1837.87	2	1837.87	-0.0004	0	85.81	1.1e-08	R	SSDCSSLTDGTILLDVR	H				File43 Spectrum13811 scans: 19651
1	1	GMOY002708-PA	hypothetical protein|protein_coding|scf7180000644279:138091-144189:-1|gene:GMOY002708	14303	67871	388	388	10	10	8889	1	1	1	919.943	1837.87	2	1837.87	-0.0004	0	108.62	5.6e-11	R	SSDCSSLTDGTILLDVR	H				File43 Spectrum14783 scans: 21078
1	1	GMOY002708-PA	hypothetical protein|protein_coding|scf7180000644279:138091-144189:-1|gene:GMOY002708	14303	67871	388	388	10	10	8890	1	1	1	919.943	1837.87	2	1837.87	-0.0004	0	105.56	1.1e-10	R	SSDCSSLTDGTILLDVR	H				File43 Spectrum10989 scans: 15816
1	1	GMOY002708-PA	hypothetical protein|protein_coding|scf7180000644279:138091-144189:-1|gene:GMOY002708	14303	67871	388	388	10	10	8891	1	1	1	919.943	1837.87	2	1837.87	-0.0002	0	134.94	1.3e-13	R	SSDCSSLTDGTILLDVR	H				File43 Spectrum9393 scans: 13881
1	1	GMOY002708-PA	hypothetical protein|protein_coding|scf7180000644279:138091-144189:-1|gene:GMOY002708	14303	67871	388	388	10	10	8892	1	1	1	919.943	1837.87	2	1837.87	-0.0002	0	113.45	1.8e-11	R	SSDCSSLTDGTILLDVR	H				File43 Spectrum14831 scans: 21153
1	1	GMOY002708-PA	hypothetical protein|protein_coding|scf7180000644279:138091-144189:-1|gene:GMOY002708	14303	67871	388	388	10	10	8893	1	1	1	919.943	1837.87	2	1837.87	-0.0002	0	125.53	1.1e-12	R	SSDCSSLTDGTILLDVR	H				File43 Spectrum11552 scans: 16524
1	1	GMOY002708-PA	hypothetical protein|protein_coding|scf7180000644279:138091-144189:-1|gene:GMOY002708	14303	67871	388	388	10	10	8894	1	1	1	919.943	1837.87	2	1837.87	-0.0002	0	119.16	4.9e-12	R	SSDCSSLTDGTILLDVR	H				File43 Spectrum16103 scans: 23677
1	1	GMOY002708-PA	hypothetical protein|protein_coding|scf7180000644279:138091-144189:-1|gene:GMOY002708	14303	67871	388	388	10	10	8895	1	1	1	613.631	1837.87	3	1837.87	-0.0002	0	58.62	5.5e-06	R	SSDCSSLTDGTILLDVR	H				File43 Spectrum8494 scans: 12849
1	1	GMOY002708-PA	hypothetical protein|protein_coding|scf7180000644279:138091-144189:-1|gene:GMOY002708	14303	67871	388	388	10	10	8898	1	1	1	919.944	1837.87	2	1837.87	-0.0001	0	105.26	1.2e-10	R	SSDCSSLTDGTILLDVR	H				File43 Spectrum9703 scans: 14253
1	1	GMOY002708-PA	hypothetical protein|protein_coding|scf7180000644279:138091-144189:-1|gene:GMOY002708	14303	67871	388	388	10	10	8899	1	1	1	919.944	1837.87	2	1837.87	-0.0001	0	90.72	3.4e-09	R	SSDCSSLTDGTILLDVR	H				File43 Spectrum14623 scans: 20828
1	1	GMOY002708-PA	hypothetical protein|protein_coding|scf7180000644279:138091-144189:-1|gene:GMOY002708	14303	67871	388	388	10	10	8900	1	1	1	613.631	1837.87	3	1837.87	0	0	33.24	0.0019	R	SSDCSSLTDGTILLDVR	H				File43 Spectrum8595 scans: 12962
1	1	GMOY002708-PA	hypothetical protein|protein_coding|scf7180000644279:138091-144189:-1|gene:GMOY002708	14303	67871	388	388	10	10	8901	1	1	1	613.631	1837.87	3	1837.87	0	0	39.2	0.00048	R	SSDCSSLTDGTILLDVR	H				File43 Spectrum16052 scans: 23568
1	1	GMOY002708-PA	hypothetical protein|protein_coding|scf7180000644279:138091-144189:-1|gene:GMOY002708	14303	67871	388	388	10	10	8902	1	1	1	919.944	1837.87	2	1837.87	0	0	81.81	2.6e-08	R	SSDCSSLTDGTILLDVR	H				File43 Spectrum12500 scans: 17788
1	1	GMOY002708-PA	hypothetical protein|protein_coding|scf7180000644279:138091-144189:-1|gene:GMOY002708	14303	67871	388	388	10	10	8903	1	1	1	919.944	1837.87	2	1837.87	0	0	134.26	1.5e-13	R	SSDCSSLTDGTILLDVR	H				File43 Spectrum12053 scans: 17182
1	1	GMOY002708-PA	hypothetical protein|protein_coding|scf7180000644279:138091-144189:-1|gene:GMOY002708	14303	67871	388	388	10	10	8904	1	1	1	919.944	1837.87	2	1837.87	0	0	140.2	3.8e-14	R	SSDCSSLTDGTILLDVR	H				File43 Spectrum13394 scans: 19048
1	1	GMOY002708-PA	hypothetical protein|protein_coding|scf7180000644279:138091-144189:-1|gene:GMOY002708	14303	67871	388	388	10	10	8905	1	1	1	919.944	1837.87	2	1837.87	0.0001	0	125.42	1.1e-12	R	SSDCSSLTDGTILLDVR	H				File43 Spectrum10491 scans: 15200
1	1	GMOY002708-PA	hypothetical protein|protein_coding|scf7180000644279:138091-144189:-1|gene:GMOY002708	14303	67871	388	388	10	10	8906	1	1	1	919.944	1837.87	2	1837.87	0.0003	0	84.27	1.5e-08	R	SSDCSSLTDGTILLDVR	H				File43 Spectrum14378 scans: 20468
1	1	GMOY002708-PA	hypothetical protein|protein_coding|scf7180000644279:138091-144189:-1|gene:GMOY002708	14303	67871	388	388	10	10	8907	1	1	1	919.944	1837.87	2	1837.87	0.0003	0	134.11	1.6e-13	R	SSDCSSLTDGTILLDVR	H				File43 Spectrum14146 scans: 20121
1	1	GMOY002708-PA	hypothetical protein|protein_coding|scf7180000644279:138091-144189:-1|gene:GMOY002708	14303	67871	388	388	10	10	8908	1	1	1	613.632	1837.87	3	1837.87	0.0004	0	40.25	0.00038	R	SSDCSSLTDGTILLDVR	H				File43 Spectrum7957 scans: 12200
1	1	GMOY002708-PA	hypothetical protein|protein_coding|scf7180000644279:138091-144189:-1|gene:GMOY002708	14303	67871	388	388	10	10	8911	1	1	1	919.944	1837.87	2	1837.87	0.0004	0	119.97	4.1e-12	R	SSDCSSLTDGTILLDVR	H				File43 Spectrum11424 scans: 16360
1	1	GMOY002708-PA	hypothetical protein|protein_coding|scf7180000644279:138091-144189:-1|gene:GMOY002708	14303	67871	388	388	10	10	8912	1	1	1	919.944	1837.87	2	1837.87	0.0004	0	139.76	4.3e-14	R	SSDCSSLTDGTILLDVR	H				File43 Spectrum13445 scans: 19124
1	1	GMOY002708-PA	hypothetical protein|protein_coding|scf7180000644279:138091-144189:-1|gene:GMOY002708	14303	67871	388	388	10	10	8913	1	1	1	919.944	1837.87	2	1837.87	0.0005	0	119.16	4.9e-12	R	SSDCSSLTDGTILLDVR	H				File43 Spectrum10181 scans: 14821
1	1	GMOY002708-PA	hypothetical protein|protein_coding|scf7180000644279:138091-144189:-1|gene:GMOY002708	14303	67871	388	388	10	10	8914	1	1	1	919.944	1837.87	2	1837.87	0.0005	0	148.25	6.1e-15	R	SSDCSSLTDGTILLDVR	H				File43 Spectrum15651 scans: 22384
1	1	GMOY002708-PA	hypothetical protein|protein_coding|scf7180000644279:138091-144189:-1|gene:GMOY002708	14303	67871	388	388	10	10	8915	1	1	1	919.944	1837.87	2	1837.87	0.0005	0	125.99	1e-12	R	SSDCSSLTDGTILLDVR	H				File43 Spectrum9793 scans: 14357
1	1	GMOY002708-PA	hypothetical protein|protein_coding|scf7180000644279:138091-144189:-1|gene:GMOY002708	14303	67871	388	388	10	10	8916	1	1	1	919.944	1837.87	2	1837.87	0.0005	0	128.93	5.2e-13	R	SSDCSSLTDGTILLDVR	H				File43 Spectrum10350 scans: 15024
1	1	GMOY002708-PA	hypothetical protein|protein_coding|scf7180000644279:138091-144189:-1|gene:GMOY002708	14303	67871	388	388	10	10	8917	1	1	1	919.944	1837.87	2	1837.87	0.0005	0	91.94	2.6e-09	R	SSDCSSLTDGTILLDVR	H				File43 Spectrum15601 scans: 22312
1	1	GMOY002708-PA	hypothetical protein|protein_coding|scf7180000644279:138091-144189:-1|gene:GMOY002708	14303	67871	388	388	10	10	8919	1	1	1	613.632	1837.87	3	1837.87	0.0007	0	34.43	0.0015	R	SSDCSSLTDGTILLDVR	H				File43 Spectrum8683 scans: 13064
1	1	GMOY002708-PA	hypothetical protein|protein_coding|scf7180000644279:138091-144189:-1|gene:GMOY002708	14303	67871	388	388	10	10	8921	1	1	1	919.944	1837.87	2	1837.87	0.0007	0	147.35	7.5e-15	R	SSDCSSLTDGTILLDVR	H				File43 Spectrum9088 scans: 13524
1	1	GMOY002708-PA	hypothetical protein|protein_coding|scf7180000644279:138091-144189:-1|gene:GMOY002708	14303	67871	388	388	10	10	8922	1	1	1	919.944	1837.87	2	1837.87	0.0007	0	70.27	3.8e-07	R	SSDCSSLTDGTILLDVR	H				File43 Spectrum13189 scans: 18748
1	1	GMOY002708-PA	hypothetical protein|protein_coding|scf7180000644279:138091-144189:-1|gene:GMOY002708	14303	67871	388	388	10	10	8923	1	1	1	919.944	1837.87	2	1837.87	0.0007	0	117.44	7.3e-12	R	SSDCSSLTDGTILLDVR	H				File43 Spectrum13240 scans: 18822
1	1	GMOY002708-PA	hypothetical protein|protein_coding|scf7180000644279:138091-144189:-1|gene:GMOY002708	14303	67871	388	388	10	10	8924	1	1	1	919.944	1837.87	2	1837.87	0.0009	0	108.96	5.3e-11	R	SSDCSSLTDGTILLDVR	H				File43 Spectrum15043 scans: 21474
1	1	GMOY002708-PA	hypothetical protein|protein_coding|scf7180000644279:138091-144189:-1|gene:GMOY002708	14303	67871	388	388	10	10	8925	1	1	1	919.944	1837.87	2	1837.87	0.001	0	121.59	2.9e-12	R	SSDCSSLTDGTILLDVR	H				File43 Spectrum8729 scans: 13116
1	1	GMOY002708-PA	hypothetical protein|protein_coding|scf7180000644279:138091-144189:-1|gene:GMOY002708	14303	67871	388	388	10	10	8926	1	1	1	919.944	1837.87	2	1837.87	0.001	0	91.47	3e-09	R	SSDCSSLTDGTILLDVR	H				File43 Spectrum10567 scans: 15292
1	1	GMOY002708-PA	hypothetical protein|protein_coding|scf7180000644279:138091-144189:-1|gene:GMOY002708	14303	67871	388	388	10	10	8927	1	1	1	919.944	1837.87	2	1837.87	0.0011	0	117.84	6.8e-12	R	SSDCSSLTDGTILLDVR	H				File43 Spectrum8554 scans: 12913
1	1	GMOY002708-PA	hypothetical protein|protein_coding|scf7180000644279:138091-144189:-1|gene:GMOY002708	14303	67871	388	388	10	10	8928	1	1	1	919.944	1837.87	2	1837.87	0.0011	0	133.6	1.8e-13	R	SSDCSSLTDGTILLDVR	H				File43 Spectrum9001 scans: 13424
1	1	GMOY002708-PA	hypothetical protein|protein_coding|scf7180000644279:138091-144189:-1|gene:GMOY002708	14303	67871	388	388	10	10	8929	1	1	1	919.944	1837.87	2	1837.87	0.0011	0	83.09	2e-08	R	SSDCSSLTDGTILLDVR	H				File43 Spectrum10255 scans: 14910
1	1	GMOY002708-PA	hypothetical protein|protein_coding|scf7180000644279:138091-144189:-1|gene:GMOY002708	14303	67871	388	388	10	10	8930	1	1	1	919.944	1837.87	2	1837.87	0.0011	0	106.33	9.7e-11	R	SSDCSSLTDGTILLDVR	H				File43 Spectrum12167 scans: 17334
1	1	GMOY002708-PA	hypothetical protein|protein_coding|scf7180000644279:138091-144189:-1|gene:GMOY002708	14303	67871	388	388	10	10	8931	1	1	1	919.944	1837.87	2	1837.87	0.0011	0	108.93	5.3e-11	R	SSDCSSLTDGTILLDVR	H				File43 Spectrum12963 scans: 18437
1	1	GMOY002708-PA	hypothetical protein|protein_coding|scf7180000644279:138091-144189:-1|gene:GMOY002708	14303	67871	388	388	10	10	8932	1	1	1	919.944	1837.87	2	1837.87	0.0011	0	106.37	9.6e-11	R	SSDCSSLTDGTILLDVR	H				File43 Spectrum13603 scans: 19349
1	1	GMOY002708-PA	hypothetical protein|protein_coding|scf7180000644279:138091-144189:-1|gene:GMOY002708	14303	67871	388	388	10	10	8933	1	1	1	919.944	1837.87	2	1837.87	0.0011	0	100.6	3.6e-10	R	SSDCSSLTDGTILLDVR	H				File43 Spectrum13550 scans: 19274
1	1	GMOY002708-PA	hypothetical protein|protein_coding|scf7180000644279:138091-144189:-1|gene:GMOY002708	14303	67871	388	388	10	10	8934	1	1	1	919.944	1837.87	2	1837.87	0.0011	0	111.93	2.7e-11	R	SSDCSSLTDGTILLDVR	H				File43 Spectrum12907 scans: 18357
1	1	GMOY002708-PA	hypothetical protein|protein_coding|scf7180000644279:138091-144189:-1|gene:GMOY002708	14303	67871	388	388	10	10	8935	1	1	1	919.944	1837.87	2	1837.87	0.0011	0	134.08	1.6e-13	R	SSDCSSLTDGTILLDVR	H				File43 Spectrum13495 scans: 19198
1	1	GMOY002708-PA	hypothetical protein|protein_coding|scf7180000644279:138091-144189:-1|gene:GMOY002708	14303	67871	388	388	10	10	8936	1	1	1	919.944	1837.87	2	1837.87	0.0012	0	108.54	5.7e-11	R	SSDCSSLTDGTILLDVR	H				File43 Spectrum14318 scans: 20374
1	1	GMOY002708-PA	hypothetical protein|protein_coding|scf7180000644279:138091-144189:-1|gene:GMOY002708	14303	67871	388	388	10	10	8938	1	1	1	919.944	1837.87	2	1837.87	0.0014	0	91.42	2.8e-09	R	SSDCSSLTDGTILLDVR	H				File43 Spectrum11120 scans: 15981
1	1	GMOY002708-PA	hypothetical protein|protein_coding|scf7180000644279:138091-144189:-1|gene:GMOY002708	14303	67871	388	388	10	10	8939	1	1	1	919.944	1837.87	2	1837.87	0.0014	0	119.2	4.7e-12	R	SSDCSSLTDGTILLDVR	H				File43 Spectrum12221 scans: 17409
1	1	GMOY002708-PA	hypothetical protein|protein_coding|scf7180000644279:138091-144189:-1|gene:GMOY002708	14303	67871	388	388	10	10	8940	1	1	1	919.944	1837.87	2	1837.87	0.0014	0	105.48	1.1e-10	R	SSDCSSLTDGTILLDVR	H				File43 Spectrum15804 scans: 22655
1	1	GMOY002708-PA	hypothetical protein|protein_coding|scf7180000644279:138091-144189:-1|gene:GMOY002708	14303	67871	388	388	10	10	8941	1	1	1	919.944	1837.87	2	1837.87	0.0014	0	106.12	9.7e-11	R	SSDCSSLTDGTILLDVR	H				File43 Spectrum11757 scans: 16790
1	1	GMOY002708-PA	hypothetical protein|protein_coding|scf7180000644279:138091-144189:-1|gene:GMOY002708	14303	67871	388	388	10	10	8942	1	1	1	919.944	1837.87	2	1837.87	0.0014	0	91.25	3e-09	R	SSDCSSLTDGTILLDVR	H				File43 Spectrum12845 scans: 18275
1	1	GMOY002708-PA	hypothetical protein|protein_coding|scf7180000644279:138091-144189:-1|gene:GMOY002708	14303	67871	388	388	10	10	8944	1	1	1	919.944	1837.87	2	1837.87	0.0015	0	79.03	4.9e-08	R	SSDCSSLTDGTILLDVR	H				File43 Spectrum10706 scans: 15464
1	1	GMOY002708-PA	hypothetical protein|protein_coding|scf7180000644279:138091-144189:-1|gene:GMOY002708	14303	67871	388	388	10	10	8945	1	1	1	919.944	1837.87	2	1837.87	0.0015	0	108.57	5.5e-11	R	SSDCSSLTDGTILLDVR	H				File43 Spectrum11818 scans: 16869
1	1	GMOY002708-PA	hypothetical protein|protein_coding|scf7180000644279:138091-144189:-1|gene:GMOY002708	14303	67871	388	388	10	10	8946	1	1	1	919.944	1837.87	2	1837.87	0.0015	0	85.25	1.2e-08	R	SSDCSSLTDGTILLDVR	H				File43 Spectrum11058 scans: 15901
1	1	GMOY002708-PA	hypothetical protein|protein_coding|scf7180000644279:138091-144189:-1|gene:GMOY002708	14303	67871	388	388	10	10	8947	1	1	1	919.944	1837.87	2	1837.87	0.0015	0	91.55	2.8e-09	R	SSDCSSLTDGTILLDVR	H				File43 Spectrum11988 scans: 17097
1	1	GMOY002708-PA	hypothetical protein|protein_coding|scf7180000644279:138091-144189:-1|gene:GMOY002708	14303	67871	388	388	10	10	8948	1	1	1	919.944	1837.87	2	1837.87	0.0016	0	114.44	1.5e-11	R	SSDCSSLTDGTILLDVR	H				File43 Spectrum15922 scans: 22909
1	1	GMOY002708-PA	hypothetical protein|protein_coding|scf7180000644279:138091-144189:-1|gene:GMOY002708	14303	67871	388	388	10	10	8949	1	1	1	919.944	1837.87	2	1837.87	0.0016	0	141.1	3.1e-14	R	SSDCSSLTDGTILLDVR	H				File43 Spectrum9315 scans: 13788
1	1	GMOY002708-PA	hypothetical protein|protein_coding|scf7180000644279:138091-144189:-1|gene:GMOY002708	14303	67871	388	388	10	10	8950	1	1	1	919.944	1837.87	2	1837.87	0.0016	0	91.5	2.9e-09	R	SSDCSSLTDGTILLDVR	H				File43 Spectrum10426 scans: 15117
1	1	GMOY002708-PA	hypothetical protein|protein_coding|scf7180000644279:138091-144189:-1|gene:GMOY002708	14303	67871	388	388	10	10	8951	1	1	1	919.944	1837.87	2	1837.87	0.0016	0	108.84	5.3e-11	R	SSDCSSLTDGTILLDVR	H				File43 Spectrum14484 scans: 20624
1	1	GMOY002708-PA	hypothetical protein|protein_coding|scf7180000644279:138091-144189:-1|gene:GMOY002708	14303	67871	388	388	10	10	8954	1	1	1	919.944	1837.87	2	1837.87	0.0017	0	120.27	3.8e-12	R	SSDCSSLTDGTILLDVR	H				File43 Spectrum8152 scans: 12433
1	1	GMOY002708-PA	hypothetical protein|protein_coding|scf7180000644279:138091-144189:-1|gene:GMOY002708	14303	67871	388	388	10	10	8955	1	1	1	919.944	1837.87	2	1837.87	0.0017	0	133.38	1.9e-13	R	SSDCSSLTDGTILLDVR	H				File43 Spectrum10773 scans: 15548
1	1	GMOY002708-PA	hypothetical protein|protein_coding|scf7180000644279:138091-144189:-1|gene:GMOY002708	14303	67871	388	388	10	10	8956	1	1	1	919.944	1837.87	2	1837.87	0.0017	0	108.87	5.3e-11	R	SSDCSSLTDGTILLDVR	H				File43 Spectrum12603 scans: 17933
1	1	GMOY002708-PA	hypothetical protein|protein_coding|scf7180000644279:138091-144189:-1|gene:GMOY002708	14303	67871	388	388	10	10	8957	1	1	1	919.944	1837.87	2	1837.87	0.0017	0	133.97	1.6e-13	R	SSDCSSLTDGTILLDVR	H				File43 Spectrum10841 scans: 15633
1	1	GMOY002708-PA	hypothetical protein|protein_coding|scf7180000644279:138091-144189:-1|gene:GMOY002708	14303	67871	388	388	10	10	8960	1	1	1	919.945	1837.87	2	1837.87	0.002	0	109.01	4.9e-11	R	SSDCSSLTDGTILLDVR	H				File43 Spectrum9864 scans: 14446
1	1	GMOY002708-PA	hypothetical protein|protein_coding|scf7180000644279:138091-144189:-1|gene:GMOY002708	14303	67871	388	388	10	10	8961	1	1	1	919.945	1837.87	2	1837.87	0.002	0	99.4	4.5e-10	R	SSDCSSLTDGTILLDVR	H				File43 Spectrum15542 scans: 22224
1	1	GMOY002708-PA	hypothetical protein|protein_coding|scf7180000644279:138091-144189:-1|gene:GMOY002708	14303	67871	388	388	10	10	8962	1	1	1	919.945	1837.87	2	1837.87	0.002	0	134.16	1.5e-13	R	SSDCSSLTDGTILLDVR	H				File43 Spectrum13653 scans: 19423
1	1	GMOY002708-PA	hypothetical protein|protein_coding|scf7180000644279:138091-144189:-1|gene:GMOY002708	14303	67871	388	388	10	10	8965	1	1	1	919.945	1837.87	2	1837.87	0.0021	0	126.8	8.1e-13	R	SSDCSSLTDGTILLDVR	H				File43 Spectrum8065 scans: 12332
1	1	GMOY002708-PA	hypothetical protein|protein_coding|scf7180000644279:138091-144189:-1|gene:GMOY002708	14303	67871	388	388	10	10	8966	1	1	1	919.945	1837.87	2	1837.87	0.0021	0	141.04	3.1e-14	R	SSDCSSLTDGTILLDVR	H				File43 Spectrum8827 scans: 13225
1	1	GMOY002708-PA	hypothetical protein|protein_coding|scf7180000644279:138091-144189:-1|gene:GMOY002708	14303	67871	388	388	10	10	8967	1	1	1	919.945	1837.87	2	1837.87	0.0021	0	140.06	3.8e-14	R	SSDCSSLTDGTILLDVR	H				File43 Spectrum13918 scans: 19800
1	1	GMOY002708-PA	hypothetical protein|protein_coding|scf7180000644279:138091-144189:-1|gene:GMOY002708	14303	67871	388	388	10	10	8968	1	1	1	919.945	1837.87	2	1837.87	0.0021	0	113.85	1.6e-11	R	SSDCSSLTDGTILLDVR	H				File43 Spectrum13342 scans: 18973
1	1	GMOY002708-PA	hypothetical protein|protein_coding|scf7180000644279:138091-144189:-1|gene:GMOY002708	14303	67871	388	388	10	10	8969	1	1	1	919.945	1837.88	2	1837.87	0.0023	0	136.03	9.7e-14	R	SSDCSSLTDGTILLDVR	H				File43 Spectrum8918 scans: 13328
1	1	GMOY002708-PA	hypothetical protein|protein_coding|scf7180000644279:138091-144189:-1|gene:GMOY002708	14303	67871	388	388	10	10	8970	1	1	1	919.945	1837.88	2	1837.87	0.0023	0	75.23	1.2e-07	R	SSDCSSLTDGTILLDVR	H				File43 Spectrum10102 scans: 14727
1	1	GMOY002708-PA	hypothetical protein|protein_coding|scf7180000644279:138091-144189:-1|gene:GMOY002708	14303	67871	388	388	10	10	8971	1	1	1	919.945	1837.88	2	1837.87	0.0023	0	93.38	1.8e-09	R	SSDCSSLTDGTILLDVR	H				File43 Spectrum12107 scans: 17255
1	1	GMOY002708-PA	hypothetical protein|protein_coding|scf7180000644279:138091-144189:-1|gene:GMOY002708	14303	67871	388	388	10	10	8972	1	1	1	919.945	1837.88	2	1837.87	0.0023	0	87.34	7.2e-09	R	SSDCSSLTDGTILLDVR	H				File43 Spectrum13024 scans: 18520
1	1	GMOY002708-PA	hypothetical protein|protein_coding|scf7180000644279:138091-144189:-1|gene:GMOY002708	14303	67871	388	388	10	10	8973	1	1	1	919.945	1837.88	2	1837.87	0.0023	0	125.78	1e-12	R	SSDCSSLTDGTILLDVR	H				File43 Spectrum14264 scans: 20297
1	1	GMOY002708-PA	hypothetical protein|protein_coding|scf7180000644279:138091-144189:-1|gene:GMOY002708	14303	67871	388	388	10	10	8974	1	1	1	919.945	1837.88	2	1837.87	0.0025	0	140.59	3.4e-14	R	SSDCSSLTDGTILLDVR	H				File43 Spectrum15773 scans: 22586
1	1	GMOY002708-PA	hypothetical protein|protein_coding|scf7180000644279:138091-144189:-1|gene:GMOY002708	14303	67871	388	388	10	10	8975	1	1	1	919.945	1837.88	2	1837.87	0.0025	0	125.68	1.1e-12	R	SSDCSSLTDGTILLDVR	H				File43 Spectrum13290 scans: 18897
1	1	GMOY002708-PA	hypothetical protein|protein_coding|scf7180000644279:138091-144189:-1|gene:GMOY002708	14303	67871	388	388	10	10	8978	1	1	1	919.945	1837.88	2	1837.87	0.0026	0	148.45	5.6e-15	R	SSDCSSLTDGTILLDVR	H				File43 Spectrum7988 scans: 12240
1	1	GMOY002708-PA	hypothetical protein|protein_coding|scf7180000644279:138091-144189:-1|gene:GMOY002708	14303	67871	388	388	10	10	8979	1	1	1	919.945	1837.88	2	1837.87	0.0026	0	133.38	1.8e-13	R	SSDCSSLTDGTILLDVR	H				File43 Spectrum11877 scans: 16947
1	1	GMOY002708-PA	hypothetical protein|protein_coding|scf7180000644279:138091-144189:-1|gene:GMOY002708	14303	67871	388	388	10	10	8980	1	1	1	919.945	1837.88	2	1837.87	0.0026	0	101.49	2.8e-10	R	SSDCSSLTDGTILLDVR	H				File43 Spectrum10027 scans: 14637
1	1	GMOY002708-PA	hypothetical protein|protein_coding|scf7180000644279:138091-144189:-1|gene:GMOY002708	14303	67871	388	388	10	10	8981	1	1	1	919.945	1837.88	2	1837.87	0.0026	0	113.46	1.8e-11	R	SSDCSSLTDGTILLDVR	H				File43 Spectrum7750 scans: 11954
1	1	GMOY002708-PA	hypothetical protein|protein_coding|scf7180000644279:138091-144189:-1|gene:GMOY002708	14303	67871	388	388	10	10	8982	1	1	1	919.945	1837.88	2	1837.87	0.0026	0	74.08	1.5e-07	R	SSDCSSLTDGTILLDVR	H				File43 Spectrum7670 scans: 11857
1	1	GMOY002708-PA	hypothetical protein|protein_coding|scf7180000644279:138091-144189:-1|gene:GMOY002708	14303	67871	388	388	10	10	8983	1	1	1	919.945	1837.88	2	1837.87	0.0027	0	147.88	6.4e-15	R	SSDCSSLTDGTILLDVR	H				File43 Spectrum11279 scans: 16175
1	1	GMOY002708-PA	hypothetical protein|protein_coding|scf7180000644279:138091-144189:-1|gene:GMOY002708	14303	67871	388	388	10	10	8984	1	1	1	919.945	1837.88	2	1837.87	0.0027	0	111.84	2.6e-11	R	SSDCSSLTDGTILLDVR	H				File43 Spectrum14095 scans: 20047
1	1	GMOY002708-PA	hypothetical protein|protein_coding|scf7180000644279:138091-144189:-1|gene:GMOY002708	14303	67871	388	388	10	10	8985	1	1	1	919.945	1837.88	2	1837.87	0.0028	0	155.57	1.1e-15	R	SSDCSSLTDGTILLDVR	H				File43 Spectrum11339 scans: 16254
1	1	GMOY002708-PA	hypothetical protein|protein_coding|scf7180000644279:138091-144189:-1|gene:GMOY002708	14303	67871	388	388	10	10	8986	1	1	1	919.945	1837.88	2	1837.87	0.0028	0	134.29	1.5e-13	R	SSDCSSLTDGTILLDVR	H				File43 Spectrum12277 scans: 17486
1	1	GMOY002708-PA	hypothetical protein|protein_coding|scf7180000644279:138091-144189:-1|gene:GMOY002708	14303	67871	388	388	10	10	8987	1	1	1	919.945	1837.88	2	1837.87	0.0028	0	99.13	4.8e-10	R	SSDCSSLTDGTILLDVR	H				File43 Spectrum7840 scans: 12059
1	1	GMOY002708-PA	hypothetical protein|protein_coding|scf7180000644279:138091-144189:-1|gene:GMOY002708	14303	67871	388	388	10	10	8988	1	1	1	613.633	1837.88	3	1837.87	0.0029	0	30.19	0.0037	R	SSDCSSLTDGTILLDVR	H				File43 Spectrum8973 scans: 13390
1	1	GMOY002708-PA	hypothetical protein|protein_coding|scf7180000644279:138091-144189:-1|gene:GMOY002708	14303	67871	388	388	10	10	8990	1	1	1	919.945	1837.88	2	1837.87	0.0031	0	119.77	4.1e-12	R	SSDCSSLTDGTILLDVR	H				File43 Spectrum11933 scans: 17023
1	1	GMOY002708-PA	hypothetical protein|protein_coding|scf7180000644279:138091-144189:-1|gene:GMOY002708	14303	67871	388	388	10	10	8992	1	1	1	919.945	1837.88	2	1837.87	0.0032	0	148.89	5e-15	R	SSDCSSLTDGTILLDVR	H				File43 Spectrum7915 scans: 12149
1	1	GMOY002708-PA	hypothetical protein|protein_coding|scf7180000644279:138091-144189:-1|gene:GMOY002708	14303	67871	388	388	10	10	8993	1	1	1	919.945	1837.88	2	1837.87	0.0032	0	148.92	5e-15	R	SSDCSSLTDGTILLDVR	H				File43 Spectrum8635 scans: 13010
1	1	GMOY002708-PA	hypothetical protein|protein_coding|scf7180000644279:138091-144189:-1|gene:GMOY002708	14303	67871	388	388	10	10	8994	1	1	1	919.945	1837.88	2	1837.87	0.0032	0	100.21	3.7e-10	R	SSDCSSLTDGTILLDVR	H				File43 Spectrum14988 scans: 21393
1	1	GMOY002708-PA	hypothetical protein|protein_coding|scf7180000644279:138091-144189:-1|gene:GMOY002708	14303	67871	388	388	10	10	8995	1	1	1	919.945	1837.88	2	1837.87	0.0033	0	134.04	1.5e-13	R	SSDCSSLTDGTILLDVR	H				File43 Spectrum13707 scans: 19500
1	1	GMOY002708-PA	hypothetical protein|protein_coding|scf7180000644279:138091-144189:-1|gene:GMOY002708	14303	67871	388	388	10	10	8996	1	1	1	919.945	1837.88	2	1837.87	0.0034	0	127.8	6.6e-13	R	SSDCSSLTDGTILLDVR	H				File43 Spectrum14040 scans: 19971
1	1	GMOY002708-PA	hypothetical protein|protein_coding|scf7180000644279:138091-144189:-1|gene:GMOY002708	14303	67871	388	388	10	10	8998	1	1	1	919.945	1837.88	2	1837.87	0.0035	0	108.87	5.2e-11	R	SSDCSSLTDGTILLDVR	H				File43 Spectrum15111 scans: 21579
1	1	GMOY002708-PA	hypothetical protein|protein_coding|scf7180000644279:138091-144189:-1|gene:GMOY002708	14303	67871	388	388	10	10	8999	1	1	1	919.946	1837.88	2	1837.87	0.0037	0	140.59	3.5e-14	R	SSDCSSLTDGTILLDVR	H				File43 Spectrum9944 scans: 14540
1	1	GMOY002708-PA	hypothetical protein|protein_coding|scf7180000644279:138091-144189:-1|gene:GMOY002708	14303	67871	388	388	10	10	9000	1	1	1	919.946	1837.88	2	1837.87	0.0039	0	89.77	4.2e-09	R	SSDCSSLTDGTILLDVR	H				File43 Spectrum14903 scans: 21263
1	1	GMOY002708-PA	hypothetical protein|protein_coding|scf7180000644279:138091-144189:-1|gene:GMOY002708	14303	67871	388	388	10	10	9002	1	1	1	919.946	1837.88	2	1837.87	0.0045	0	148.69	5.5e-15	R	SSDCSSLTDGTILLDVR	H				File43 Spectrum8452 scans: 12799
1	1	GMOY002708-PA	hypothetical protein|protein_coding|scf7180000644279:138091-144189:-1|gene:GMOY002708	14303	67871	388	388	10	10	9004	1	1	1	919.947	1837.88	2	1837.87	0.0071	0	118.59	5.7e-12	R	SSDCSSLTDGTILLDVR	H				File43 Spectrum12825 scans: 18248
1	1	GMOY002708-PA	hypothetical protein|protein_coding|scf7180000644279:138091-144189:-1|gene:GMOY002708	14303	67871	388	388	10	10	9709	1	1	1	642.297	1923.87	3	1923.87	-0.0034	1	39.56	0.00024	R	CPLGQWYDSDVRLCR	D				File43 Spectrum9578 scans: 14105
1	1	GMOY002708-PA	hypothetical protein|protein_coding|scf7180000644279:138091-144189:-1|gene:GMOY002708	14303	67871	388	388	10	10	9716	1	1	1	642.297	1923.87	3	1923.87	-0.0028	1	43.22	0.0001	R	CPLGQWYDSDVRLCR	D				File43 Spectrum9443 scans: 13943
1	1	GMOY002708-PA	hypothetical protein|protein_coding|scf7180000644279:138091-144189:-1|gene:GMOY002708	14303	67871	388	388	10	10	9787	1	1	1	642.298	1923.87	3	1923.87	0.0003	1	32.16	0.0012	R	CPLGQWYDSDVRLCR	D				File43 Spectrum9911 scans: 14503
1	1	GMOY002708-PA	hypothetical protein|protein_coding|scf7180000644279:138091-144189:-1|gene:GMOY002708	14303	67871	388	388	10	10	9804	1	1	1	642.299	1923.87	3	1923.87	0.0021	1	43.62	0.0001	R	CPLGQWYDSDVRLCR	D				File43 Spectrum9214 scans: 13668
1	1	GMOY002708-PA	hypothetical protein|protein_coding|scf7180000644279:138091-144189:-1|gene:GMOY002708	14303	67871	388	388	10	10	9806	1	1	1	642.299	1923.87	3	1923.87	0.0028	1	42.87	0.00012	R	CPLGQWYDSDVRLCR	D				File43 Spectrum9288 scans: 13757
1	1	GMOY002708-PA	hypothetical protein|protein_coding|scf7180000644279:138091-144189:-1|gene:GMOY002708	14303	67871	388	388	10	10	9807	1	1	1	642.299	1923.88	3	1923.87	0.003	1	37.75	0.00039	R	CPLGQWYDSDVRLCR	D				File43 Spectrum9118 scans: 13557
1	1	GMOY002708-PA	hypothetical protein|protein_coding|scf7180000644279:138091-144189:-1|gene:GMOY002708	14303	67871	388	388	10	10	9809	1	1	1	642.299	1923.88	3	1923.87	0.0034	1	33.17	0.0011	R	CPLGQWYDSDVRLCR	D				File43 Spectrum9752 scans: 14311
1	1	GMOY002708-PA	hypothetical protein|protein_coding|scf7180000644279:138091-144189:-1|gene:GMOY002708	14303	67871	388	388	10	10	9810	1	1	1	642.299	1923.88	3	1923.87	0.0045	1	38.15	0.00037	R	CPLGQWYDSDVRLCR	D				File43 Spectrum9369 scans: 13852
1	1	GMOY002708-PA	hypothetical protein|protein_coding|scf7180000644279:138091-144189:-1|gene:GMOY002708	14303	67871	388	388	10	10	9812	1	1	1	642.302	1923.88	3	1923.87	0.0127	1	31.59	0.0019	R	CPLGQWYDSDVRLCR	D				File43 Spectrum8639 scans: 13014
1	1	GMOY002708-PA	hypothetical protein|protein_coding|scf7180000644279:138091-144189:-1|gene:GMOY002708	14303	67871	388	388	10	10	10433	1	1	1	665.665	1993.97	3	1993.97	-0.0015	1	38.15	0.00057	R	RSSDCSSLTDGTILLDVR	H				File43 Spectrum8364 scans: 12697
1	1	GMOY002708-PA	hypothetical protein|protein_coding|scf7180000644279:138091-144189:-1|gene:GMOY002708	14303	67871	388	388	10	10	10435	1	1	1	665.665	1993.97	3	1993.97	-0.0008	1	59.54	4.1e-06	R	RSSDCSSLTDGTILLDVR	H				File43 Spectrum13163 scans: 18714
1	1	GMOY002708-PA	hypothetical protein|protein_coding|scf7180000644279:138091-144189:-1|gene:GMOY002708	14303	67871	388	388	10	10	10436	1	1	1	665.665	1993.97	3	1993.97	-0.0002	1	45.67	0.0001	R	RSSDCSSLTDGTILLDVR	H				File43 Spectrum15299 scans: 21863
1	1	GMOY002708-PA	hypothetical protein|protein_coding|scf7180000644279:138091-144189:-1|gene:GMOY002708	14303	67871	388	388	10	10	10438	1	1	1	665.665	1993.97	3	1993.97	0.0001	1	42.58	0.0002	R	RSSDCSSLTDGTILLDVR	H				File43 Spectrum14257 scans: 20289
1	1	GMOY002708-PA	hypothetical protein|protein_coding|scf7180000644279:138091-144189:-1|gene:GMOY002708	14303	67871	388	388	10	10	10440	1	1	1	665.665	1993.97	3	1993.97	0.0001	1	35.06	0.0012	R	RSSDCSSLTDGTILLDVR	H				File43 Spectrum10791 scans: 15572
1	1	GMOY002708-PA	hypothetical protein|protein_coding|scf7180000644279:138091-144189:-1|gene:GMOY002708	14303	67871	388	388	10	10	10442	1	1	1	665.665	1993.97	3	1993.97	0.0003	1	32.92	0.0019	R	RSSDCSSLTDGTILLDVR	H				File43 Spectrum9479 scans: 13987
1	1	GMOY002708-PA	hypothetical protein|protein_coding|scf7180000644279:138091-144189:-1|gene:GMOY002708	14303	67871	388	388	10	10	10443	1	1	1	665.665	1993.97	3	1993.97	0.0005	1	36.75	0.00077	R	RSSDCSSLTDGTILLDVR	H				File43 Spectrum15446 scans: 22080
1	1	GMOY002708-PA	hypothetical protein|protein_coding|scf7180000644279:138091-144189:-1|gene:GMOY002708	14303	67871	388	388	10	10	10444	1	1	1	665.665	1993.97	3	1993.97	0.0007	1	45.86	9.5e-05	R	RSSDCSSLTDGTILLDVR	H				File43 Spectrum13317 scans: 18939
1	1	GMOY002708-PA	hypothetical protein|protein_coding|scf7180000644279:138091-144189:-1|gene:GMOY002708	14303	67871	388	388	10	10	10445	1	1	1	665.665	1993.97	3	1993.97	0.0007	1	38.11	0.00056	R	RSSDCSSLTDGTILLDVR	H				File43 Spectrum14969 scans: 21365
1	1	GMOY002708-PA	hypothetical protein|protein_coding|scf7180000644279:138091-144189:-1|gene:GMOY002708	14303	67871	388	388	10	10	10446	1	1	1	665.665	1993.97	3	1993.97	0.0009	1	42.69	0.0002	R	RSSDCSSLTDGTILLDVR	H				File43 Spectrum11747 scans: 16778
1	1	GMOY002708-PA	hypothetical protein|protein_coding|scf7180000644279:138091-144189:-1|gene:GMOY002708	14303	67871	388	388	10	10	10447	1	1	1	665.665	1993.97	3	1993.97	0.0009	1	44.85	0.00012	R	RSSDCSSLTDGTILLDVR	H				File43 Spectrum14212 scans: 20219
1	1	GMOY002708-PA	hypothetical protein|protein_coding|scf7180000644279:138091-144189:-1|gene:GMOY002708	14303	67871	388	388	10	10	10448	1	1	1	665.665	1993.97	3	1993.97	0.0009	1	31.68	0.0025	R	RSSDCSSLTDGTILLDVR	H				File43 Spectrum14656 scans: 20878
1	1	GMOY002708-PA	hypothetical protein|protein_coding|scf7180000644279:138091-144189:-1|gene:GMOY002708	14303	67871	388	388	10	10	10449	1	1	1	665.666	1993.97	3	1993.97	0.0011	1	43.09	0.00018	R	RSSDCSSLTDGTILLDVR	H				File43 Spectrum12765 scans: 18162
1	1	GMOY002708-PA	hypothetical protein|protein_coding|scf7180000644279:138091-144189:-1|gene:GMOY002708	14303	67871	388	388	10	10	10450	1	1	1	665.666	1993.97	3	1993.97	0.0011	1	34.09	0.0014	R	RSSDCSSLTDGTILLDVR	H				File43 Spectrum11684 scans: 16697
1	1	GMOY002708-PA	hypothetical protein|protein_coding|scf7180000644279:138091-144189:-1|gene:GMOY002708	14303	67871	388	388	10	10	10451	1	1	1	665.666	1993.97	3	1993.97	0.0011	1	54.64	1.3e-05	R	RSSDCSSLTDGTILLDVR	H				File43 Spectrum14165 scans: 20148
1	1	GMOY002708-PA	hypothetical protein|protein_coding|scf7180000644279:138091-144189:-1|gene:GMOY002708	14303	67871	388	388	10	10	10452	1	1	1	665.666	1993.97	3	1993.97	0.0011	1	36.27	0.00086	R	RSSDCSSLTDGTILLDVR	H				File43 Spectrum11299 scans: 16200
1	1	GMOY002708-PA	hypothetical protein|protein_coding|scf7180000644279:138091-144189:-1|gene:GMOY002708	14303	67871	388	388	10	10	10453	1	1	1	665.666	1993.97	3	1993.97	0.0011	1	39.75	0.00039	R	RSSDCSSLTDGTILLDVR	H				File43 Spectrum12877 scans: 18320
1	1	GMOY002708-PA	hypothetical protein|protein_coding|scf7180000644279:138091-144189:-1|gene:GMOY002708	14303	67871	388	388	10	10	10455	1	1	1	665.666	1993.98	3	1993.97	0.0012	1	38.75	0.00049	R	RSSDCSSLTDGTILLDVR	H				File43 Spectrum14606 scans: 20805
1	1	GMOY002708-PA	hypothetical protein|protein_coding|scf7180000644279:138091-144189:-1|gene:GMOY002708	14303	67871	388	388	10	10	10456	1	1	1	665.666	1993.98	3	1993.97	0.0012	1	44.77	0.00012	R	RSSDCSSLTDGTILLDVR	H				File43 Spectrum12266 scans: 17471
1	1	GMOY002708-PA	hypothetical protein|protein_coding|scf7180000644279:138091-144189:-1|gene:GMOY002708	14303	67871	388	388	10	10	10457	1	1	1	665.666	1993.98	3	1993.97	0.0012	1	39.26	0.00043	R	RSSDCSSLTDGTILLDVR	H				File43 Spectrum12597 scans: 17924
1	1	GMOY002708-PA	hypothetical protein|protein_coding|scf7180000644279:138091-144189:-1|gene:GMOY002708	14303	67871	388	388	10	10	10458	1	1	1	665.666	1993.98	3	1993.97	0.0012	1	48.84	4.8e-05	R	RSSDCSSLTDGTILLDVR	H				File43 Spectrum11981 scans: 17089
1	1	GMOY002708-PA	hypothetical protein|protein_coding|scf7180000644279:138091-144189:-1|gene:GMOY002708	14303	67871	388	388	10	10	10460	1	1	1	665.666	1993.98	3	1993.97	0.0014	1	44.32	0.00013	R	RSSDCSSLTDGTILLDVR	H				File43 Spectrum14005 scans: 19922
1	1	GMOY002708-PA	hypothetical protein|protein_coding|scf7180000644279:138091-144189:-1|gene:GMOY002708	14303	67871	388	388	10	10	10461	1	1	1	665.666	1993.98	3	1993.97	0.0014	1	37.99	0.00058	R	RSSDCSSLTDGTILLDVR	H				File43 Spectrum13372 scans: 19016
1	1	GMOY002708-PA	hypothetical protein|protein_coding|scf7180000644279:138091-144189:-1|gene:GMOY002708	14303	67871	388	388	10	10	10462	1	1	1	665.666	1993.98	3	1993.97	0.0014	1	46.07	9e-05	R	RSSDCSSLTDGTILLDVR	H				File43 Spectrum11874 scans: 16941
1	1	GMOY002708-PA	hypothetical protein|protein_coding|scf7180000644279:138091-144189:-1|gene:GMOY002708	14303	67871	388	388	10	10	10463	1	1	1	665.666	1993.98	3	1993.97	0.0014	1	41.26	0.00027	R	RSSDCSSLTDGTILLDVR	H				File43 Spectrum13269 scans: 18866
1	1	GMOY002708-PA	hypothetical protein|protein_coding|scf7180000644279:138091-144189:-1|gene:GMOY002708	14303	67871	388	388	10	10	10464	1	1	1	665.666	1993.98	3	1993.97	0.0014	1	48.15	5.6e-05	R	RSSDCSSLTDGTILLDVR	H				File43 Spectrum12209 scans: 17395
1	1	GMOY002708-PA	hypothetical protein|protein_coding|scf7180000644279:138091-144189:-1|gene:GMOY002708	14303	67871	388	388	10	10	10465	1	1	1	665.666	1993.98	3	1993.97	0.0014	1	36.41	0.00083	R	RSSDCSSLTDGTILLDVR	H				File43 Spectrum12544 scans: 17849
1	1	GMOY002708-PA	hypothetical protein|protein_coding|scf7180000644279:138091-144189:-1|gene:GMOY002708	14303	67871	388	388	10	10	10466	1	1	1	665.666	1993.98	3	1993.97	0.0014	1	45.84	9.5e-05	R	RSSDCSSLTDGTILLDVR	H				File43 Spectrum13470 scans: 19165
1	1	GMOY002708-PA	hypothetical protein|protein_coding|scf7180000644279:138091-144189:-1|gene:GMOY002708	14303	67871	388	388	10	10	10467	1	1	1	665.666	1993.98	3	1993.97	0.0014	1	36.16	0.00088	R	RSSDCSSLTDGTILLDVR	H				File43 Spectrum10864 scans: 15663
1	1	GMOY002708-PA	hypothetical protein|protein_coding|scf7180000644279:138091-144189:-1|gene:GMOY002708	14303	67871	388	388	10	10	10468	1	1	1	665.666	1993.98	3	1993.97	0.0014	1	54.55	1.3e-05	R	RSSDCSSLTDGTILLDVR	H				File43 Spectrum15252 scans: 21792
1	1	GMOY002708-PA	hypothetical protein|protein_coding|scf7180000644279:138091-144189:-1|gene:GMOY002708	14303	67871	388	388	10	10	10470	1	1	1	665.666	1993.98	3	1993.97	0.0016	1	51.33	2.7e-05	R	RSSDCSSLTDGTILLDVR	H				File43 Spectrum14925 scans: 21296
1	1	GMOY002708-PA	hypothetical protein|protein_coding|scf7180000644279:138091-144189:-1|gene:GMOY002708	14303	67871	388	388	10	10	10471	1	1	1	665.666	1993.98	3	1993.97	0.0016	1	50.88	3e-05	R	RSSDCSSLTDGTILLDVR	H				File43 Spectrum11812 scans: 16861
1	1	GMOY002708-PA	hypothetical protein|protein_coding|scf7180000644279:138091-144189:-1|gene:GMOY002708	14303	67871	388	388	10	10	10472	1	1	1	665.666	1993.98	3	1993.97	0.0016	1	38.46	0.00052	R	RSSDCSSLTDGTILLDVR	H				File43 Spectrum14312 scans: 20366
1	1	GMOY002708-PA	hypothetical protein|protein_coding|scf7180000644279:138091-144189:-1|gene:GMOY002708	14303	67871	388	388	10	10	10473	1	1	1	665.666	1993.98	3	1993.97	0.0016	1	47.51	6.5e-05	R	RSSDCSSLTDGTILLDVR	H				File43 Spectrum14555 scans: 20728
1	1	GMOY002708-PA	hypothetical protein|protein_coding|scf7180000644279:138091-144189:-1|gene:GMOY002708	14303	67871	388	388	10	10	10474	1	1	1	665.666	1993.98	3	1993.97	0.0016	1	61.91	2.4e-06	R	RSSDCSSLTDGTILLDVR	H				File43 Spectrum14508 scans: 20657
1	1	GMOY002708-PA	hypothetical protein|protein_coding|scf7180000644279:138091-144189:-1|gene:GMOY002708	14303	67871	388	388	10	10	10475	1	1	1	665.666	1993.98	3	1993.97	0.0016	1	34.62	0.0013	R	RSSDCSSLTDGTILLDVR	H				File43 Spectrum12375 scans: 17621
1	1	GMOY002708-PA	hypothetical protein|protein_coding|scf7180000644279:138091-144189:-1|gene:GMOY002708	14303	67871	388	388	10	10	10477	1	1	1	665.666	1993.98	3	1993.97	0.0016	1	34.98	0.0012	R	RSSDCSSLTDGTILLDVR	H				File43 Spectrum15400 scans: 22009
1	1	GMOY002708-PA	hypothetical protein|protein_coding|scf7180000644279:138091-144189:-1|gene:GMOY002708	14303	67871	388	388	10	10	10478	1	1	1	665.666	1993.98	3	1993.97	0.0018	1	37.51	0.00065	R	RSSDCSSLTDGTILLDVR	H				File43 Spectrum12318 scans: 17544
1	1	GMOY002708-PA	hypothetical protein|protein_coding|scf7180000644279:138091-144189:-1|gene:GMOY002708	14303	67871	388	388	10	10	10479	1	1	1	665.666	1993.98	3	1993.97	0.0018	1	39.65	0.0004	R	RSSDCSSLTDGTILLDVR	H				File43 Spectrum13740 scans: 19544
1	1	GMOY002708-PA	hypothetical protein|protein_coding|scf7180000644279:138091-144189:-1|gene:GMOY002708	14303	67871	388	388	10	10	10480	1	1	1	665.666	1993.98	3	1993.97	0.0018	1	38.7	0.00049	R	RSSDCSSLTDGTILLDVR	H				File43 Spectrum15540 scans: 22221
1	1	GMOY002708-PA	hypothetical protein|protein_coding|scf7180000644279:138091-144189:-1|gene:GMOY002708	14303	67871	388	388	10	10	10481	1	1	1	665.666	1993.98	3	1993.97	0.0018	1	44.46	0.00013	R	RSSDCSSLTDGTILLDVR	H				File43 Spectrum13948 scans: 19844
1	1	GMOY002708-PA	hypothetical protein|protein_coding|scf7180000644279:138091-144189:-1|gene:GMOY002708	14303	67871	388	388	10	10	10482	1	1	1	665.666	1993.98	3	1993.97	0.0018	1	39.7	0.00039	R	RSSDCSSLTDGTILLDVR	H				File43 Spectrum13895 scans: 19768
1	1	GMOY002708-PA	hypothetical protein|protein_coding|scf7180000644279:138091-144189:-1|gene:GMOY002708	14303	67871	388	388	10	10	10483	1	1	1	665.666	1993.98	3	1993.97	0.0018	1	39.66	0.00039	R	RSSDCSSLTDGTILLDVR	H				File43 Spectrum12434 scans: 17699
1	1	GMOY002708-PA	hypothetical protein|protein_coding|scf7180000644279:138091-144189:-1|gene:GMOY002708	14303	67871	388	388	10	10	10484	1	1	1	665.666	1993.98	3	1993.97	0.0018	1	43.86	0.00015	R	RSSDCSSLTDGTILLDVR	H				File43 Spectrum15204 scans: 21721
1	1	GMOY002708-PA	hypothetical protein|protein_coding|scf7180000644279:138091-144189:-1|gene:GMOY002708	14303	67871	388	388	10	10	10485	1	1	1	665.666	1993.98	3	1993.97	0.0018	1	42.18	0.00022	R	RSSDCSSLTDGTILLDVR	H				File43 Spectrum14878 scans: 21225
1	1	GMOY002708-PA	hypothetical protein|protein_coding|scf7180000644279:138091-144189:-1|gene:GMOY002708	14303	67871	388	388	10	10	10488	1	1	1	665.666	1993.98	3	1993.97	0.002	1	46.52	8.1e-05	R	RSSDCSSLTDGTILLDVR	H				File43 Spectrum15352 scans: 21937
1	1	GMOY002708-PA	hypothetical protein|protein_coding|scf7180000644279:138091-144189:-1|gene:GMOY002708	14303	67871	388	388	10	10	10489	1	1	1	665.666	1993.98	3	1993.97	0.002	1	42.94	0.00019	R	RSSDCSSLTDGTILLDVR	H				File43 Spectrum14405 scans: 20509
1	1	GMOY002708-PA	hypothetical protein|protein_coding|scf7180000644279:138091-144189:-1|gene:GMOY002708	14303	67871	388	388	10	10	10490	1	1	1	665.666	1993.98	3	1993.97	0.002	1	60.93	2.9e-06	R	RSSDCSSLTDGTILLDVR	H				File43 Spectrum14786 scans: 21084
1	1	GMOY002708-PA	hypothetical protein|protein_coding|scf7180000644279:138091-144189:-1|gene:GMOY002708	14303	67871	388	388	10	10	10491	1	1	1	665.666	1993.98	3	1993.97	0.002	1	44.39	0.00013	R	RSSDCSSLTDGTILLDVR	H				File43 Spectrum12158 scans: 17323
1	1	GMOY002708-PA	hypothetical protein|protein_coding|scf7180000644279:138091-144189:-1|gene:GMOY002708	14303	67871	388	388	10	10	10492	1	1	1	665.666	1993.98	3	1993.97	0.002	1	37.95	0.00059	R	RSSDCSSLTDGTILLDVR	H				File43 Spectrum14057 scans: 19997
1	1	GMOY002708-PA	hypothetical protein|protein_coding|scf7180000644279:138091-144189:-1|gene:GMOY002708	14303	67871	388	388	10	10	10494	1	1	1	665.666	1993.98	3	1993.97	0.0021	1	48.54	5.1e-05	R	RSSDCSSLTDGTILLDVR	H				File43 Spectrum11925 scans: 17013
1	1	GMOY002708-PA	hypothetical protein|protein_coding|scf7180000644279:138091-144189:-1|gene:GMOY002708	14303	67871	388	388	10	10	10495	1	1	1	665.666	1993.98	3	1993.97	0.0021	1	34.25	0.0014	R	RSSDCSSLTDGTILLDVR	H				File43 Spectrum12710 scans: 18084
1	1	GMOY002708-PA	hypothetical protein|protein_coding|scf7180000644279:138091-144189:-1|gene:GMOY002708	14303	67871	388	388	10	10	10496	1	1	1	665.666	1993.98	3	1993.97	0.0021	1	40.88	0.0003	R	RSSDCSSLTDGTILLDVR	H				File43 Spectrum15020 scans: 21439
1	1	GMOY002708-PA	hypothetical protein|protein_coding|scf7180000644279:138091-144189:-1|gene:GMOY002708	14303	67871	388	388	10	10	10497	1	1	1	665.666	1993.98	3	1993.97	0.0021	1	38.97	0.00046	R	RSSDCSSLTDGTILLDVR	H				File43 Spectrum13581 scans: 19318
1	1	GMOY002708-PA	hypothetical protein|protein_coding|scf7180000644279:138091-144189:-1|gene:GMOY002708	14303	67871	388	388	10	10	10498	1	1	1	665.666	1993.98	3	1993.97	0.0021	1	46.77	7.7e-05	R	RSSDCSSLTDGTILLDVR	H				File43 Spectrum12821 scans: 18242
1	1	GMOY002708-PA	hypothetical protein|protein_coding|scf7180000644279:138091-144189:-1|gene:GMOY002708	14303	67871	388	388	10	10	10499	1	1	1	665.666	1993.98	3	1993.97	0.0021	1	45.69	9.8e-05	R	RSSDCSSLTDGTILLDVR	H				File43 Spectrum13686 scans: 19468
1	1	GMOY002708-PA	hypothetical protein|protein_coding|scf7180000644279:138091-144189:-1|gene:GMOY002708	14303	67871	388	388	10	10	10500	1	1	1	665.666	1993.98	3	1993.97	0.0021	1	38.03	0.00057	R	RSSDCSSLTDGTILLDVR	H				File43 Spectrum15067 scans: 21509
1	1	GMOY002708-PA	hypothetical protein|protein_coding|scf7180000644279:138091-144189:-1|gene:GMOY002708	14303	67871	388	388	10	10	10501	1	1	1	665.666	1993.98	3	1993.97	0.0021	1	36.56	0.00081	R	RSSDCSSLTDGTILLDVR	H				File43 Spectrum13841 scans: 19693
1	1	GMOY002708-PA	hypothetical protein|protein_coding|scf7180000644279:138091-144189:-1|gene:GMOY002708	14303	67871	388	388	10	10	10502	1	1	1	665.666	1993.98	3	1993.97	0.0024	1	48.37	5.2e-05	R	RSSDCSSLTDGTILLDVR	H				File43 Spectrum12042 scans: 17169
1	1	GMOY002708-PA	hypothetical protein|protein_coding|scf7180000644279:138091-144189:-1|gene:GMOY002708	14303	67871	388	388	10	10	10503	1	1	1	665.666	1993.98	3	1993.97	0.0024	1	46.43	8.1e-05	R	RSSDCSSLTDGTILLDVR	H				File43 Spectrum14459 scans: 20585
1	1	GMOY002708-PA	hypothetical protein|protein_coding|scf7180000644279:138091-144189:-1|gene:GMOY002708	14303	67871	388	388	10	10	10504	1	1	1	665.666	1993.98	3	1993.97	0.0024	1	50.08	3.5e-05	R	RSSDCSSLTDGTILLDVR	H				File43 Spectrum14744 scans: 21016
1	1	GMOY002708-PA	hypothetical protein|protein_coding|scf7180000644279:138091-144189:-1|gene:GMOY002708	14303	67871	388	388	10	10	10505	1	1	1	665.666	1993.98	3	1993.97	0.0024	1	39.23	0.00042	R	RSSDCSSLTDGTILLDVR	H				File43 Spectrum13215 scans: 18789
1	1	GMOY002708-PA	hypothetical protein|protein_coding|scf7180000644279:138091-144189:-1|gene:GMOY002708	14303	67871	388	388	10	10	10506	1	1	1	665.666	1993.98	3	1993.97	0.0024	1	41.5	0.00025	R	RSSDCSSLTDGTILLDVR	H				File43 Spectrum15494 scans: 22151
1	1	GMOY002708-PA	hypothetical protein|protein_coding|scf7180000644279:138091-144189:-1|gene:GMOY002708	14303	67871	388	388	10	10	10509	1	1	1	665.666	1993.98	3	1993.97	0.0025	1	46.48	8e-05	R	RSSDCSSLTDGTILLDVR	H				File43 Spectrum14832 scans: 21155
1	1	GMOY002708-PA	hypothetical protein|protein_coding|scf7180000644279:138091-144189:-1|gene:GMOY002708	14303	67871	388	388	10	10	10510	1	1	1	665.666	1993.98	3	1993.97	0.0025	1	37.73	0.0006	R	RSSDCSSLTDGTILLDVR	H				File43 Spectrum13529 scans: 19244
1	1	GMOY002708-PA	hypothetical protein|protein_coding|scf7180000644279:138091-144189:-1|gene:GMOY002708	14303	67871	388	388	10	10	10511	1	1	1	665.666	1993.98	3	1993.97	0.0025	1	44.07	0.00014	R	RSSDCSSLTDGTILLDVR	H				File43 Spectrum14698 scans: 20946
1	1	GMOY002708-PA	hypothetical protein|protein_coding|scf7180000644279:138091-144189:-1|gene:GMOY002708	14303	67871	388	388	10	10	10512	1	1	1	665.666	1993.98	3	1993.97	0.0025	1	43.36	0.00016	R	RSSDCSSLTDGTILLDVR	H				File43 Spectrum13052 scans: 18560
1	1	GMOY002708-PA	hypothetical protein|protein_coding|scf7180000644279:138091-144189:-1|gene:GMOY002708	14303	67871	388	388	10	10	10513	1	1	1	665.666	1993.98	3	1993.97	0.0025	1	30.63	0.0031	R	RSSDCSSLTDGTILLDVR	H				File43 Spectrum13111 scans: 18640
1	1	GMOY002708-PA	hypothetical protein|protein_coding|scf7180000644279:138091-144189:-1|gene:GMOY002708	14303	67871	388	388	10	10	10514	1	1	1	665.666	1993.98	3	1993.97	0.0025	1	42.43	0.0002	R	RSSDCSSLTDGTILLDVR	H				File43 Spectrum15156 scans: 21648
1	1	GMOY002708-PA	hypothetical protein|protein_coding|scf7180000644279:138091-144189:-1|gene:GMOY002708	14303	67871	388	388	10	10	10515	1	1	1	665.666	1993.98	3	1993.97	0.0025	1	32.01	0.0022	R	RSSDCSSLTDGTILLDVR	H				File43 Spectrum11429 scans: 16368
1	1	GMOY002708-PA	hypothetical protein|protein_coding|scf7180000644279:138091-144189:-1|gene:GMOY002708	14303	67871	388	388	10	10	10516	1	1	1	665.666	1993.98	3	1993.97	0.0027	1	49.15	4.3e-05	R	RSSDCSSLTDGTILLDVR	H				File43 Spectrum14361 scans: 20438
1	1	GMOY002708-PA	hypothetical protein|protein_coding|scf7180000644279:138091-144189:-1|gene:GMOY002708	14303	67871	388	388	10	10	10517	1	1	1	665.666	1993.98	3	1993.97	0.0027	1	45.7	9.6e-05	R	RSSDCSSLTDGTILLDVR	H				File43 Spectrum16154 scans: 23773
1	1	GMOY002708-PA	hypothetical protein|protein_coding|scf7180000644279:138091-144189:-1|gene:GMOY002708	14303	67871	388	388	10	10	10518	1	1	1	665.666	1993.98	3	1993.97	0.0027	1	48.82	4.7e-05	R	RSSDCSSLTDGTILLDVR	H				File43 Spectrum13635 scans: 19393
1	1	GMOY002708-PA	hypothetical protein|protein_coding|scf7180000644279:138091-144189:-1|gene:GMOY002708	14303	67871	388	388	10	10	10519	1	1	1	665.666	1993.98	3	1993.97	0.0027	1	42.29	0.00021	R	RSSDCSSLTDGTILLDVR	H				File43 Spectrum13792 scans: 19620
1	1	GMOY002708-PA	hypothetical protein|protein_coding|scf7180000644279:138091-144189:-1|gene:GMOY002708	14303	67871	388	388	10	10	10522	1	1	1	665.666	1993.98	3	1993.97	0.0031	1	37.33	0.00062	R	RSSDCSSLTDGTILLDVR	H				File43 Spectrum11563 scans: 16537
1	1	GMOY002708-PA	hypothetical protein|protein_coding|scf7180000644279:138091-144189:-1|gene:GMOY002708	14303	67871	388	388	10	10	10525	1	1	1	665.666	1993.98	3	1993.97	0.0031	1	48.35	4.9e-05	R	RSSDCSSLTDGTILLDVR	H				File43 Spectrum12994 scans: 18481
1	1	GMOY002708-PA	hypothetical protein|protein_coding|scf7180000644279:138091-144189:-1|gene:GMOY002708	14303	67871	388	388	10	10	10526	1	1	1	665.666	1993.98	3	1993.97	0.0031	1	38.73	0.00045	R	RSSDCSSLTDGTILLDVR	H				File43 Spectrum12490 scans: 17775
1	1	GMOY002708-PA	hypothetical protein|protein_coding|scf7180000644279:138091-144189:-1|gene:GMOY002708	14303	67871	388	388	10	10	10527	1	1	1	665.666	1993.98	3	1993.97	0.0031	1	32.86	0.0017	R	RSSDCSSLTDGTILLDVR	H				File43 Spectrum15589 scans: 22294
1	1	GMOY002708-PA	hypothetical protein|protein_coding|scf7180000644279:138091-144189:-1|gene:GMOY002708	14303	67871	388	388	10	10	10528	1	1	1	665.666	1993.98	3	1993.97	0.0031	1	46.62	7.3e-05	R	RSSDCSSLTDGTILLDVR	H				File43 Spectrum9409 scans: 13900
1	1	GMOY002708-PA	hypothetical protein|protein_coding|scf7180000644279:138091-144189:-1|gene:GMOY002708	14303	67871	388	388	10	10	10529	1	1	1	665.666	1993.98	3	1993.97	0.0033	1	37.81	0.00055	R	RSSDCSSLTDGTILLDVR	H				File43 Spectrum13419 scans: 19089
1	1	GMOY002708-PA	hypothetical protein|protein_coding|scf7180000644279:138091-144189:-1|gene:GMOY002708	14303	67871	388	388	10	10	10530	1	1	1	665.666	1993.98	3	1993.97	0.0033	1	64.47	1.2e-06	R	RSSDCSSLTDGTILLDVR	H				File43 Spectrum12934 scans: 18399
1	1	GMOY002708-PA	hypothetical protein|protein_coding|scf7180000644279:138091-144189:-1|gene:GMOY002708	14303	67871	388	388	10	10	10532	1	1	1	665.666	1993.98	3	1993.97	0.0036	1	40.15	0.00033	R	RSSDCSSLTDGTILLDVR	H				File43 Spectrum14113 scans: 20073
1	1	GMOY002708-PA	hypothetical protein|protein_coding|scf7180000644279:138091-144189:-1|gene:GMOY002708	14303	67871	388	388	10	10	10533	1	1	1	665.667	1993.98	3	1993.97	0.0038	1	51.01	2.7e-05	R	RSSDCSSLTDGTILLDVR	H				File43 Spectrum15110 scans: 21578
1	1	GMOY002708-PA	hypothetical protein|protein_coding|scf7180000644279:138091-144189:-1|gene:GMOY002708	14303	67871	388	388	10	10	10534	1	1	1	665.667	1993.98	3	1993.97	0.0038	1	33.69	0.0014	R	RSSDCSSLTDGTILLDVR	H				File43 Spectrum10338 scans: 15010
1	1	GMOY002708-PA	hypothetical protein|protein_coding|scf7180000644279:138091-144189:-1|gene:GMOY002708	14303	67871	388	388	10	10	10535	1	1	1	665.667	1993.98	3	1993.97	0.0038	1	41.82	0.00022	R	RSSDCSSLTDGTILLDVR	H				File43 Spectrum16119 scans: 23708
1	1	GMOY002708-PA	hypothetical protein|protein_coding|scf7180000644279:138091-144189:-1|gene:GMOY002708	14303	67871	388	388	10	10	10536	1	1	1	665.667	1993.98	3	1993.97	0.0047	1	37.45	0.0006	R	RSSDCSSLTDGTILLDVR	H				File43 Spectrum11362 scans: 16285
1	1	GMOY002708-PA	hypothetical protein|protein_coding|scf7180000644279:138091-144189:-1|gene:GMOY002708	14303	67871	388	388	10	10	10537	1	1	1	665.667	1993.98	3	1993.97	0.0051	1	33.4	0.0015	R	RSSDCSSLTDGTILLDVR	H				File43 Spectrum11147 scans: 16015
1	1	GMOY002708-PA	hypothetical protein|protein_coding|scf7180000644279:138091-144189:-1|gene:GMOY002708	14303	67871	388	388	10	10	10538	1	1	1	665.667	1993.98	3	1993.97	0.0062	1	43.07	0.00016	R	RSSDCSSLTDGTILLDVR	H				File43 Spectrum8467 scans: 12815	emPAI	0.85
2	1	GMOY001525-PA	hypothetical protein|protein_coding|scf7180000641491:115440-116963:-1|gene:GMOY001525	2194	54546	107	107	8	8	1407	1	1	1	506.793	1011.57	2	1011.57	-0.0009	0	51.35	1.3e-05	R	IPVGAETLGR	I				File43 Spectrum3030 scans: 6473
2	1	GMOY001525-PA	hypothetical protein|protein_coding|scf7180000641491:115440-116963:-1|gene:GMOY001525	2194	54546	107	107	8	8	3727	1	1	1	631.824	1261.63	2	1261.63	-0.001	0	48.8	7.1e-05	R	TIAMDGTEGLVR	G				File43 Spectrum4723 scans: 8435
2	1	GMOY001525-PA	hypothetical protein|protein_coding|scf7180000641491:115440-116963:-1|gene:GMOY001525	2194	54546	107	107	8	8	3728	1	1	1	631.824	1261.63	2	1261.63	-0.0001	0	54.97	1.7e-05	R	TIAMDGTEGLVR	G				File43 Spectrum4814 scans: 8542
2	1	GMOY001525-PA	hypothetical protein|protein_coding|scf7180000641491:115440-116963:-1|gene:GMOY001525	2194	54546	107	107	8	8	3729	1	1	1	631.824	1261.63	2	1261.63	-0.0001	0	50.81	4.4e-05	R	TIAMDGTEGLVR	G				File43 Spectrum4901 scans: 8643
2	1	GMOY001525-PA	hypothetical protein|protein_coding|scf7180000641491:115440-116963:-1|gene:GMOY001525	2194	54546	107	107	8	8	4687	1	1	1	684.38	1366.75	2	1366.75	0.0006	0	57.8	4.1e-06	R	IINVIGEPIDER	G				File43 Spectrum6487 scans: 10491
2	1	GMOY001525-PA	hypothetical protein|protein_coding|scf7180000641491:115440-116963:-1|gene:GMOY001525	2194	54546	107	107	8	8	4688	1	1	1	684.38	1366.75	2	1366.75	0.0007	0	55.6	6.7e-06	R	IINVIGEPIDER	G				File43 Spectrum6402 scans: 10389
2	1	GMOY001525-PA	hypothetical protein|protein_coding|scf7180000641491:115440-116963:-1|gene:GMOY001525	2194	54546	107	107	8	8	4689	1	1	1	684.381	1366.75	2	1366.75	0.0016	0	52.53	1.4e-05	R	IINVIGEPIDER	G				File43 Spectrum6318 scans: 10292
2	1	GMOY001525-PA	hypothetical protein|protein_coding|scf7180000641491:115440-116963:-1|gene:GMOY001525	2194	54546	107	107	8	8	5205	1	1	1	718.38	1434.75	2	1434.75	-0.0009	0	78.92	6.7e-08	R	FTQAGSEVSALLGR	I				File43 Spectrum7416 scans: 11555
2	1	GMOY001525-PA	hypothetical protein|protein_coding|scf7180000641491:115440-116963:-1|gene:GMOY001525	2194	54546	107	107	8	8	5206	1	1	1	718.381	1434.75	2	1434.75	0.0015	0	84.4	1.9e-08	R	FTQAGSEVSALLGR	I				File43 Spectrum7491 scans: 11645
2	1	GMOY001525-PA	hypothetical protein|protein_coding|scf7180000641491:115440-116963:-1|gene:GMOY001525	2194	54546	107	107	8	8	6990	1	1	1	559.32	1674.94	3	1674.94	-0.0037	0	42.38	6.6e-05	R	LVLEVAQHLGENVVR	T				File43 Spectrum12782 scans: 18188
2	1	GMOY001525-PA	hypothetical protein|protein_coding|scf7180000641491:115440-116963:-1|gene:GMOY001525	2194	54546	107	107	8	8	6991	1	1	1	559.32	1674.94	3	1674.94	-0.0035	0	39.47	0.00013	R	LVLEVAQHLGENVVR	T				File43 Spectrum11629 scans: 16622
2	1	GMOY001525-PA	hypothetical protein|protein_coding|scf7180000641491:115440-116963:-1|gene:GMOY001525	2194	54546	107	107	8	8	6993	1	1	1	838.477	1674.94	2	1674.94	-0.0024	0	43.57	5.3e-05	R	LVLEVAQHLGENVVR	T				File43 Spectrum14379 scans: 20470
2	1	GMOY001525-PA	hypothetical protein|protein_coding|scf7180000641491:115440-116963:-1|gene:GMOY001525	2194	54546	107	107	8	8	6994	1	1	1	838.477	1674.94	2	1674.94	-0.0019	0	75.87	3e-08	R	LVLEVAQHLGENVVR	T				File43 Spectrum13117 scans: 18647
2	1	GMOY001525-PA	hypothetical protein|protein_coding|scf7180000641491:115440-116963:-1|gene:GMOY001525	2194	54546	107	107	8	8	6995	1	1	1	559.321	1674.94	3	1674.94	-0.0018	0	36.89	0.00024	R	LVLEVAQHLGENVVR	T				File43 Spectrum13286 scans: 18891
2	1	GMOY001525-PA	hypothetical protein|protein_coding|scf7180000641491:115440-116963:-1|gene:GMOY001525	2194	54546	107	107	8	8	6996	1	1	1	838.477	1674.94	2	1674.94	-0.0018	0	61.27	8.6e-07	R	LVLEVAQHLGENVVR	T				File43 Spectrum13930 scans: 19817
2	1	GMOY001525-PA	hypothetical protein|protein_coding|scf7180000641491:115440-116963:-1|gene:GMOY001525	2194	54546	107	107	8	8	6997	1	1	1	559.321	1674.94	3	1674.94	-0.0015	0	44.1	4.5e-05	R	LVLEVAQHLGENVVR	T				File43 Spectrum12900 scans: 18348
2	1	GMOY001525-PA	hypothetical protein|protein_coding|scf7180000641491:115440-116963:-1|gene:GMOY001525	2194	54546	107	107	8	8	6998	1	1	1	559.321	1674.94	3	1674.94	-0.0015	0	35.7	0.00031	R	LVLEVAQHLGENVVR	T				File43 Spectrum14188 scans: 20187
2	1	GMOY001525-PA	hypothetical protein|protein_coding|scf7180000641491:115440-116963:-1|gene:GMOY001525	2194	54546	107	107	8	8	6999	1	1	1	559.321	1674.94	3	1674.94	-0.0015	0	33.07	0.00057	R	LVLEVAQHLGENVVR	T				File43 Spectrum11895 scans: 16973
2	1	GMOY001525-PA	hypothetical protein|protein_coding|scf7180000641491:115440-116963:-1|gene:GMOY001525	2194	54546	107	107	8	8	7002	1	1	1	559.321	1674.94	3	1674.94	-0.0011	0	30.8	0.00096	R	LVLEVAQHLGENVVR	T				File43 Spectrum14654 scans: 20875
2	1	GMOY001525-PA	hypothetical protein|protein_coding|scf7180000641491:115440-116963:-1|gene:GMOY001525	2194	54546	107	107	8	8	7003	1	1	1	559.321	1674.94	3	1674.94	-0.0011	0	34.7	0.00039	R	LVLEVAQHLGENVVR	T				File43 Spectrum15369 scans: 21960
2	1	GMOY001525-PA	hypothetical protein|protein_coding|scf7180000641491:115440-116963:-1|gene:GMOY001525	2194	54546	107	107	8	8	7005	1	1	1	559.321	1674.94	3	1674.94	-0.0009	0	31.75	0.00067	R	LVLEVAQHLGENVVR	T				File43 Spectrum12136 scans: 17292
2	1	GMOY001525-PA	hypothetical protein|protein_coding|scf7180000641491:115440-116963:-1|gene:GMOY001525	2194	54546	107	107	8	8	7006	1	1	1	838.478	1674.94	2	1674.94	-0.0009	0	78.67	1.4e-08	R	LVLEVAQHLGENVVR	T				File43 Spectrum13197 scans: 18762
2	1	GMOY001525-PA	hypothetical protein|protein_coding|scf7180000641491:115440-116963:-1|gene:GMOY001525	2194	54546	107	107	8	8	7007	1	1	1	559.321	1674.94	3	1674.94	-0.0008	0	34.57	0.00035	R	LVLEVAQHLGENVVR	T				File43 Spectrum14787 scans: 21085
2	1	GMOY001525-PA	hypothetical protein|protein_coding|scf7180000641491:115440-116963:-1|gene:GMOY001525	2194	54546	107	107	8	8	7008	1	1	1	838.478	1674.94	2	1674.94	-0.0007	0	60.9	8.1e-07	R	LVLEVAQHLGENVVR	T				File43 Spectrum14924 scans: 21294
2	1	GMOY001525-PA	hypothetical protein|protein_coding|scf7180000641491:115440-116963:-1|gene:GMOY001525	2194	54546	107	107	8	8	7009	1	1	1	559.321	1674.94	3	1674.94	-0.0006	0	39.76	0.00011	R	LVLEVAQHLGENVVR	T				File43 Spectrum13661 scans: 19432
2	1	GMOY001525-PA	hypothetical protein|protein_coding|scf7180000641491:115440-116963:-1|gene:GMOY001525	2194	54546	107	107	8	8	7010	1	1	1	559.321	1674.94	3	1674.94	-0.0006	0	44.58	3.5e-05	R	LVLEVAQHLGENVVR	T				File43 Spectrum13395 scans: 19049
2	1	GMOY001525-PA	hypothetical protein|protein_coding|scf7180000641491:115440-116963:-1|gene:GMOY001525	2194	54546	107	107	8	8	7011	1	1	1	559.321	1674.94	3	1674.94	-0.0006	0	47.16	1.9e-05	R	LVLEVAQHLGENVVR	T				File43 Spectrum14142 scans: 20116
2	1	GMOY001525-PA	hypothetical protein|protein_coding|scf7180000641491:115440-116963:-1|gene:GMOY001525	2194	54546	107	107	8	8	7012	1	1	1	559.321	1674.94	3	1674.94	-0.0006	0	31.14	0.00077	R	LVLEVAQHLGENVVR	T				File43 Spectrum13503 scans: 19207
2	1	GMOY001525-PA	hypothetical protein|protein_coding|scf7180000641491:115440-116963:-1|gene:GMOY001525	2194	54546	107	107	8	8	7013	1	1	1	559.321	1674.94	3	1674.94	-0.0006	0	38.91	0.00013	R	LVLEVAQHLGENVVR	T				File43 Spectrum14030 scans: 19958
2	1	GMOY001525-PA	hypothetical protein|protein_coding|scf7180000641491:115440-116963:-1|gene:GMOY001525	2194	54546	107	107	8	8	7015	1	1	1	559.321	1674.94	3	1674.94	-0.0004	0	46.17	2.4e-05	R	LVLEVAQHLGENVVR	T				File43 Spectrum12955 scans: 18427
2	1	GMOY001525-PA	hypothetical protein|protein_coding|scf7180000641491:115440-116963:-1|gene:GMOY001525	2194	54546	107	107	8	8	7016	1	1	1	559.321	1674.94	3	1674.94	-0.0004	0	41.55	7e-05	R	LVLEVAQHLGENVVR	T				File43 Spectrum14084 scans: 20034
2	1	GMOY001525-PA	hypothetical protein|protein_coding|scf7180000641491:115440-116963:-1|gene:GMOY001525	2194	54546	107	107	8	8	7017	1	1	1	559.321	1674.94	3	1674.94	-0.0004	0	32.23	0.0006	R	LVLEVAQHLGENVVR	T				File43 Spectrum13135 scans: 18671
2	1	GMOY001525-PA	hypothetical protein|protein_coding|scf7180000641491:115440-116963:-1|gene:GMOY001525	2194	54546	107	107	8	8	7019	1	1	1	559.321	1674.94	3	1674.94	-0.0002	0	30.37	0.00092	R	LVLEVAQHLGENVVR	T				File43 Spectrum15460 scans: 22100
2	1	GMOY001525-PA	hypothetical protein|protein_coding|scf7180000641491:115440-116963:-1|gene:GMOY001525	2194	54546	107	107	8	8	7021	1	1	1	559.321	1674.94	3	1674.94	0	0	50.66	8.6e-06	R	LVLEVAQHLGENVVR	T				File43 Spectrum14385 scans: 20479
2	1	GMOY001525-PA	hypothetical protein|protein_coding|scf7180000641491:115440-116963:-1|gene:GMOY001525	2194	54546	107	107	8	8	7022	1	1	1	559.321	1674.94	3	1674.94	0	0	44.56	3.5e-05	R	LVLEVAQHLGENVVR	T				File43 Spectrum14697 scans: 20944
2	1	GMOY001525-PA	hypothetical protein|protein_coding|scf7180000641491:115440-116963:-1|gene:GMOY001525	2194	54546	107	107	8	8	7023	1	1	1	559.321	1674.94	3	1674.94	0	0	36.1	0.00025	R	LVLEVAQHLGENVVR	T				File43 Spectrum13922 scans: 19807
2	1	GMOY001525-PA	hypothetical protein|protein_coding|scf7180000641491:115440-116963:-1|gene:GMOY001525	2194	54546	107	107	8	8	7024	1	1	1	559.321	1674.94	3	1674.94	0	0	31.75	0.00067	R	LVLEVAQHLGENVVR	T				File43 Spectrum13558 scans: 19284
2	1	GMOY001525-PA	hypothetical protein|protein_coding|scf7180000641491:115440-116963:-1|gene:GMOY001525	2194	54546	107	107	8	8	7026	1	1	1	559.321	1674.94	3	1674.94	0	0	32.64	0.00054	R	LVLEVAQHLGENVVR	T				File43 Spectrum15265 scans: 21811
2	1	GMOY001525-PA	hypothetical protein|protein_coding|scf7180000641491:115440-116963:-1|gene:GMOY001525	2194	54546	107	107	8	8	7027	1	1	1	559.321	1674.94	3	1674.94	0.0002	0	34.87	0.00033	R	LVLEVAQHLGENVVR	T				File43 Spectrum14604 scans: 20802
2	1	GMOY001525-PA	hypothetical protein|protein_coding|scf7180000641491:115440-116963:-1|gene:GMOY001525	2194	54546	107	107	8	8	7028	1	1	1	559.321	1674.94	3	1674.94	0.0002	0	41.03	7.9e-05	R	LVLEVAQHLGENVVR	T				File43 Spectrum13235 scans: 18816
2	1	GMOY001525-PA	hypothetical protein|protein_coding|scf7180000641491:115440-116963:-1|gene:GMOY001525	2194	54546	107	107	8	8	7029	1	1	1	559.321	1674.94	3	1674.94	0.0002	0	47.97	1.6e-05	R	LVLEVAQHLGENVVR	T				File43 Spectrum12187 scans: 17363
2	1	GMOY001525-PA	hypothetical protein|protein_coding|scf7180000641491:115440-116963:-1|gene:GMOY001525	2194	54546	107	107	8	8	7030	1	1	1	559.321	1674.94	3	1674.94	0.0002	0	35.27	0.0003	R	LVLEVAQHLGENVVR	T				File43 Spectrum13339 scans: 18969
2	1	GMOY001525-PA	hypothetical protein|protein_coding|scf7180000641491:115440-116963:-1|gene:GMOY001525	2194	54546	107	107	8	8	7031	1	1	1	838.478	1674.94	2	1674.94	0.0002	0	44.27	3.7e-05	R	LVLEVAQHLGENVVR	T				File43 Spectrum15533 scans: 22210
2	1	GMOY001525-PA	hypothetical protein|protein_coding|scf7180000641491:115440-116963:-1|gene:GMOY001525	2194	54546	107	107	8	8	7032	1	1	1	559.321	1674.94	3	1674.94	0.0003	0	49.15	1.2e-05	R	LVLEVAQHLGENVVR	T				File43 Spectrum12243 scans: 17439
2	1	GMOY001525-PA	hypothetical protein|protein_coding|scf7180000641491:115440-116963:-1|gene:GMOY001525	2194	54546	107	107	8	8	7033	1	1	1	838.478	1674.94	2	1674.94	0.0004	0	52.8	5.2e-06	R	LVLEVAQHLGENVVR	T				File43 Spectrum13854 scans: 19711
2	1	GMOY001525-PA	hypothetical protein|protein_coding|scf7180000641491:115440-116963:-1|gene:GMOY001525	2194	54546	107	107	8	8	7034	1	1	1	559.321	1674.94	3	1674.94	0.0005	0	41.46	7.1e-05	R	LVLEVAQHLGENVVR	T				File43 Spectrum14235 scans: 20258
2	1	GMOY001525-PA	hypothetical protein|protein_coding|scf7180000641491:115440-116963:-1|gene:GMOY001525	2194	54546	107	107	8	8	7035	1	1	1	559.321	1674.94	3	1674.94	0.0005	0	32.18	0.00061	R	LVLEVAQHLGENVVR	T				File43 Spectrum14290 scans: 20334
2	1	GMOY001525-PA	hypothetical protein|protein_coding|scf7180000641491:115440-116963:-1|gene:GMOY001525	2194	54546	107	107	8	8	7036	1	1	1	559.321	1674.94	3	1674.94	0.0005	0	36.05	0.00025	R	LVLEVAQHLGENVVR	T				File43 Spectrum13979 scans: 19885
2	1	GMOY001525-PA	hypothetical protein|protein_coding|scf7180000641491:115440-116963:-1|gene:GMOY001525	2194	54546	107	107	8	8	7037	1	1	1	559.321	1674.94	3	1674.94	0.0005	0	41.59	6.9e-05	R	LVLEVAQHLGENVVR	T				File43 Spectrum14343 scans: 20410
2	1	GMOY001525-PA	hypothetical protein|protein_coding|scf7180000641491:115440-116963:-1|gene:GMOY001525	2194	54546	107	107	8	8	7038	1	1	1	559.321	1674.94	3	1674.94	0.0007	0	32.77	0.00053	R	LVLEVAQHLGENVVR	T				File43 Spectrum12632 scans: 17970
2	1	GMOY001525-PA	hypothetical protein|protein_coding|scf7180000641491:115440-116963:-1|gene:GMOY001525	2194	54546	107	107	8	8	7039	1	1	1	559.322	1674.94	3	1674.94	0.0009	0	41.25	7.5e-05	R	LVLEVAQHLGENVVR	T				File43 Spectrum12525 scans: 17821
2	1	GMOY001525-PA	hypothetical protein|protein_coding|scf7180000641491:115440-116963:-1|gene:GMOY001525	2194	54546	107	107	8	8	7040	1	1	1	559.322	1674.94	3	1674.94	0.0009	0	37.75	0.00017	R	LVLEVAQHLGENVVR	T				File43 Spectrum12076 scans: 17213
2	1	GMOY001525-PA	hypothetical protein|protein_coding|scf7180000641491:115440-116963:-1|gene:GMOY001525	2194	54546	107	107	8	8	7043	1	1	1	838.479	1674.94	2	1674.94	0.001	0	45.27	3e-05	R	LVLEVAQHLGENVVR	T				File43 Spectrum14195 scans: 20195
2	1	GMOY001525-PA	hypothetical protein|protein_coding|scf7180000641491:115440-116963:-1|gene:GMOY001525	2194	54546	107	107	8	8	7044	1	1	1	559.322	1674.94	3	1674.94	0.0011	0	31.08	0.00078	R	LVLEVAQHLGENVVR	T				File43 Spectrum15078 scans: 21529
2	1	GMOY001525-PA	hypothetical protein|protein_coding|scf7180000641491:115440-116963:-1|gene:GMOY001525	2194	54546	107	107	8	8	7045	1	1	1	559.322	1674.94	3	1674.94	0.0011	0	33.27	0.00047	R	LVLEVAQHLGENVVR	T				File43 Spectrum12680 scans: 18040
2	1	GMOY001525-PA	hypothetical protein|protein_coding|scf7180000641491:115440-116963:-1|gene:GMOY001525	2194	54546	107	107	8	8	7048	1	1	1	559.322	1674.94	3	1674.94	0.0012	0	30.86	0.00082	R	LVLEVAQHLGENVVR	T				File43 Spectrum13816 scans: 19657
2	1	GMOY001525-PA	hypothetical protein|protein_coding|scf7180000641491:115440-116963:-1|gene:GMOY001525	2194	54546	107	107	8	8	7049	1	1	1	559.322	1674.94	3	1674.94	0.0012	0	38.18	0.00015	R	LVLEVAQHLGENVVR	T				File43 Spectrum13610 scans: 19358
2	1	GMOY001525-PA	hypothetical protein|protein_coding|scf7180000641491:115440-116963:-1|gene:GMOY001525	2194	54546	107	107	8	8	7050	1	1	1	559.322	1674.94	3	1674.94	0.0012	0	34.13	0.00039	R	LVLEVAQHLGENVVR	T				File43 Spectrum14486 scans: 20627
2	1	GMOY001525-PA	hypothetical protein|protein_coding|scf7180000641491:115440-116963:-1|gene:GMOY001525	2194	54546	107	107	8	8	7051	1	1	1	559.322	1674.94	3	1674.94	0.0012	0	33.24	0.00047	R	LVLEVAQHLGENVVR	T				File43 Spectrum15415 scans: 22030
2	1	GMOY001525-PA	hypothetical protein|protein_coding|scf7180000641491:115440-116963:-1|gene:GMOY001525	2194	54546	107	107	8	8	7052	1	1	1	838.479	1674.94	2	1674.94	0.0014	0	52.16	6.1e-06	R	LVLEVAQHLGENVVR	T				File43 Spectrum15440 scans: 22066
2	1	GMOY001525-PA	hypothetical protein|protein_coding|scf7180000641491:115440-116963:-1|gene:GMOY001525	2194	54546	107	107	8	8	7053	1	1	1	559.322	1674.94	3	1674.94	0.0015	0	36.5	0.00022	R	LVLEVAQHLGENVVR	T				File43 Spectrum14556 scans: 20729
2	1	GMOY001525-PA	hypothetical protein|protein_coding|scf7180000641491:115440-116963:-1|gene:GMOY001525	2194	54546	107	107	8	8	7054	1	1	1	838.479	1674.94	2	1674.94	0.0016	0	64.98	3.2e-07	R	LVLEVAQHLGENVVR	T				File43 Spectrum13612 scans: 19360
2	1	GMOY001525-PA	hypothetical protein|protein_coding|scf7180000641491:115440-116963:-1|gene:GMOY001525	2194	54546	107	107	8	8	7055	1	1	1	559.322	1674.94	3	1674.94	0.0016	0	36.65	0.00022	R	LVLEVAQHLGENVVR	T				File43 Spectrum13870 scans: 19733
2	1	GMOY001525-PA	hypothetical protein|protein_coding|scf7180000641491:115440-116963:-1|gene:GMOY001525	2194	54546	107	107	8	8	7056	1	1	1	559.322	1674.94	3	1674.94	0.0016	0	32.34	0.00058	R	LVLEVAQHLGENVVR	T				File43 Spectrum14985 scans: 21387
2	1	GMOY001525-PA	hypothetical protein|protein_coding|scf7180000641491:115440-116963:-1|gene:GMOY001525	2194	54546	107	107	8	8	7057	1	1	1	559.322	1674.94	3	1674.94	0.0016	0	31.45	0.00072	R	LVLEVAQHLGENVVR	T				File43 Spectrum13184 scans: 18742
2	1	GMOY001525-PA	hypothetical protein|protein_coding|scf7180000641491:115440-116963:-1|gene:GMOY001525	2194	54546	107	107	8	8	7058	1	1	1	559.322	1674.94	3	1674.94	0.0016	0	40.39	9.1e-05	R	LVLEVAQHLGENVVR	T				File43 Spectrum12838 scans: 18266
2	1	GMOY001525-PA	hypothetical protein|protein_coding|scf7180000641491:115440-116963:-1|gene:GMOY001525	2194	54546	107	107	8	8	7059	1	1	1	559.322	1674.94	3	1674.94	0.0016	0	37	0.0002	R	LVLEVAQHLGENVVR	T				File43 Spectrum14743 scans: 21014
2	1	GMOY001525-PA	hypothetical protein|protein_coding|scf7180000641491:115440-116963:-1|gene:GMOY001525	2194	54546	107	107	8	8	7060	1	1	1	559.322	1674.94	3	1674.94	0.0016	0	32.17	0.00061	R	LVLEVAQHLGENVVR	T				File43 Spectrum15218 scans: 21740
2	1	GMOY001525-PA	hypothetical protein|protein_coding|scf7180000641491:115440-116963:-1|gene:GMOY001525	2194	54546	107	107	8	8	7063	1	1	1	838.479	1674.94	2	1674.94	0.0018	0	52.38	5.8e-06	R	LVLEVAQHLGENVVR	T				File43 Spectrum13827 scans: 19671
2	1	GMOY001525-PA	hypothetical protein|protein_coding|scf7180000641491:115440-116963:-1|gene:GMOY001525	2194	54546	107	107	8	8	7064	1	1	1	559.322	1674.94	3	1674.94	0.0018	0	41.53	7e-05	R	LVLEVAQHLGENVVR	T				File43 Spectrum12471 scans: 17745
2	1	GMOY001525-PA	hypothetical protein|protein_coding|scf7180000641491:115440-116963:-1|gene:GMOY001525	2194	54546	107	107	8	8	7065	1	1	1	559.322	1674.94	3	1674.94	0.002	0	33.83	0.00041	R	LVLEVAQHLGENVVR	T				File43 Spectrum11835 scans: 16891
2	1	GMOY001525-PA	hypothetical protein|protein_coding|scf7180000641491:115440-116963:-1|gene:GMOY001525	2194	54546	107	107	8	8	7066	1	1	1	838.479	1674.94	2	1674.94	0.0021	0	74.73	3.4e-08	R	LVLEVAQHLGENVVR	T				File43 Spectrum14055 scans: 19993
2	1	GMOY001525-PA	hypothetical protein|protein_coding|scf7180000641491:115440-116963:-1|gene:GMOY001525	2194	54546	107	107	8	8	7067	1	1	1	559.322	1674.94	3	1674.94	0.0022	0	35.73	0.00027	R	LVLEVAQHLGENVVR	T				File43 Spectrum13766 scans: 19582
2	1	GMOY001525-PA	hypothetical protein|protein_coding|scf7180000641491:115440-116963:-1|gene:GMOY001525	2194	54546	107	107	8	8	7069	1	1	1	559.322	1674.94	3	1674.94	0.0024	0	37.59	0.00017	R	LVLEVAQHLGENVVR	T				File43 Spectrum12727 scans: 18109
2	1	GMOY001525-PA	hypothetical protein|protein_coding|scf7180000641491:115440-116963:-1|gene:GMOY001525	2194	54546	107	107	8	8	7070	1	1	1	559.322	1674.94	3	1674.94	0.0024	0	34.32	0.00037	R	LVLEVAQHLGENVVR	T				File43 Spectrum15605 scans: 22320
2	1	GMOY001525-PA	hypothetical protein|protein_coding|scf7180000641491:115440-116963:-1|gene:GMOY001525	2194	54546	107	107	8	8	7071	1	1	1	838.479	1674.94	2	1674.94	0.0025	0	67.49	1.8e-07	R	LVLEVAQHLGENVVR	T				File43 Spectrum14634 scans: 20847
2	1	GMOY001525-PA	hypothetical protein|protein_coding|scf7180000641491:115440-116963:-1|gene:GMOY001525	2194	54546	107	107	8	8	7073	1	1	1	559.322	1674.94	3	1674.94	0.0027	0	36.44	0.00023	R	LVLEVAQHLGENVVR	T				File43 Spectrum12351 scans: 17587
2	1	GMOY001525-PA	hypothetical protein|protein_coding|scf7180000641491:115440-116963:-1|gene:GMOY001525	2194	54546	107	107	8	8	7074	1	1	1	559.322	1674.94	3	1674.94	0.0029	0	31.38	0.00073	R	LVLEVAQHLGENVVR	T				File43 Spectrum12018 scans: 17136
2	1	GMOY001525-PA	hypothetical protein|protein_coding|scf7180000641491:115440-116963:-1|gene:GMOY001525	2194	54546	107	107	8	8	7075	1	1	1	559.322	1674.94	3	1674.94	0.0029	0	36.49	0.00022	R	LVLEVAQHLGENVVR	T				File43 Spectrum15037 scans: 21462
2	1	GMOY001525-PA	hypothetical protein|protein_coding|scf7180000641491:115440-116963:-1|gene:GMOY001525	2194	54546	107	107	8	8	7077	1	1	1	838.48	1674.94	2	1674.94	0.0034	0	52.59	5.5e-06	R	LVLEVAQHLGENVVR	T				File43 Spectrum14845 scans: 21174
2	1	GMOY001525-PA	hypothetical protein|protein_coding|scf7180000641491:115440-116963:-1|gene:GMOY001525	2194	54546	107	107	8	8	7078	1	1	1	838.48	1674.94	2	1674.94	0.0034	0	33.81	0.00042	R	LVLEVAQHLGENVVR	T				File43 Spectrum13262 scans: 18855
2	1	GMOY001525-PA	hypothetical protein|protein_coding|scf7180000641491:115440-116963:-1|gene:GMOY001525	2194	54546	107	107	8	8	7079	1	1	1	559.322	1674.95	3	1674.94	0.0035	0	36.94	0.0002	R	LVLEVAQHLGENVVR	T				File43 Spectrum12297 scans: 17513
2	1	GMOY001525-PA	hypothetical protein|protein_coding|scf7180000641491:115440-116963:-1|gene:GMOY001525	2194	54546	107	107	8	8	7080	1	1	1	559.322	1674.95	3	1674.94	0.0038	0	42.57	5.5e-05	R	LVLEVAQHLGENVVR	T				File43 Spectrum15122 scans: 21598
2	1	GMOY001525-PA	hypothetical protein|protein_coding|scf7180000641491:115440-116963:-1|gene:GMOY001525	2194	54546	107	107	8	8	7081	1	1	1	838.48	1674.95	2	1674.94	0.0043	0	46.18	2.4e-05	R	LVLEVAQHLGENVVR	T				File43 Spectrum13346 scans: 18978
2	1	GMOY001525-PA	hypothetical protein|protein_coding|scf7180000641491:115440-116963:-1|gene:GMOY001525	2194	54546	107	107	8	8	7082	1	1	1	838.48	1674.95	2	1674.94	0.0045	0	54	4e-06	R	LVLEVAQHLGENVVR	T				File43 Spectrum15155 scans: 21646
2	1	GMOY001525-PA	hypothetical protein|protein_coding|scf7180000641491:115440-116963:-1|gene:GMOY001525	2194	54546	107	107	8	8	7083	1	1	1	838.48	1674.95	2	1674.94	0.0046	0	62.53	5.6e-07	R	LVLEVAQHLGENVVR	T				File43 Spectrum15028 scans: 21451
2	1	GMOY001525-PA	hypothetical protein|protein_coding|scf7180000641491:115440-116963:-1|gene:GMOY001525	2194	54546	107	107	8	8	7084	1	1	1	838.481	1674.95	2	1674.94	0.0051	0	52.26	5.9e-06	R	LVLEVAQHLGENVVR	T				File43 Spectrum14301 scans: 20350
2	1	GMOY001525-PA	hypothetical protein|protein_coding|scf7180000641491:115440-116963:-1|gene:GMOY001525	2194	54546	107	107	8	8	7085	1	1	1	838.481	1674.95	2	1674.94	0.0059	0	64.11	4.1e-07	R	LVLEVAQHLGENVVR	T				File43 Spectrum14777 scans: 21067
2	1	GMOY001525-PA	hypothetical protein|protein_coding|scf7180000641491:115440-116963:-1|gene:GMOY001525	2194	54546	107	107	8	8	7086	1	1	1	838.481	1674.95	2	1674.94	0.0067	0	68.78	1.4e-07	R	LVLEVAQHLGENVVR	T				File43 Spectrum15372 scans: 21963
2	1	GMOY001525-PA	hypothetical protein|protein_coding|scf7180000641491:115440-116963:-1|gene:GMOY001525	2194	54546	107	107	8	8	7087	1	1	1	838.481	1674.95	2	1674.94	0.0067	0	56.77	2.2e-06	R	LVLEVAQHLGENVVR	T				File43 Spectrum14514 scans: 20664
2	1	GMOY001525-PA	hypothetical protein|protein_coding|scf7180000641491:115440-116963:-1|gene:GMOY001525	2194	54546	107	107	8	8	10276	1	1	1	994.52	1987.02	2	1987.03	-0.0015	0	36.07	0.00093	R	AIAELGIYPAVDPLDSTSR	I				File43 Spectrum9536 scans: 14053
2	1	GMOY001525-PA	hypothetical protein|protein_coding|scf7180000641491:115440-116963:-1|gene:GMOY001525	2194	54546	107	107	8	8	10277	1	1	1	663.35	1987.03	3	1987.03	0.0008	0	40.96	0.00028	R	AIAELGIYPAVDPLDSTSR	I				File43 Spectrum9525 scans: 14040
2	1	GMOY001525-PA	hypothetical protein|protein_coding|scf7180000641491:115440-116963:-1|gene:GMOY001525	2194	54546	107	107	8	8	10278	1	1	1	994.521	1987.03	2	1987.03	0.0015	0	45.79	9.5e-05	R	AIAELGIYPAVDPLDSTSR	I				File43 Spectrum9452 scans: 13954
2	1	GMOY001525-PA	hypothetical protein|protein_coding|scf7180000641491:115440-116963:-1|gene:GMOY001525	2194	54546	107	107	8	8	10279	1	1	1	663.35	1987.03	3	1987.03	0.0015	0	49.2	4.3e-05	R	AIAELGIYPAVDPLDSTSR	I				File43 Spectrum9446 scans: 13947
2	1	GMOY001525-PA	hypothetical protein|protein_coding|scf7180000641491:115440-116963:-1|gene:GMOY001525	2194	54546	107	107	8	8	10599	1	1	1	671.048	2010.12	3	2010.13	-0.0041	1	32.43	0.00066	K	VLDTGFPIRIPVGAETLGR	I				File43 Spectrum12486 scans: 17767
2	1	GMOY001525-PA	hypothetical protein|protein_coding|scf7180000641491:115440-116963:-1|gene:GMOY001525	2194	54546	107	107	8	8	10602	1	1	1	671.049	2010.12	3	2010.13	-0.0014	1	40.53	9.3e-05	K	VLDTGFPIRIPVGAETLGR	I				File43 Spectrum12252 scans: 17451
2	1	GMOY001525-PA	hypothetical protein|protein_coding|scf7180000641491:115440-116963:-1|gene:GMOY001525	2194	54546	107	107	8	8	10604	1	1	1	671.049	2010.13	3	2010.13	-0.0007	1	36.09	0.00025	K	VLDTGFPIRIPVGAETLGR	I				File43 Spectrum12188 scans: 17365
2	1	GMOY001525-PA	hypothetical protein|protein_coding|scf7180000641491:115440-116963:-1|gene:GMOY001525	2194	54546	107	107	8	8	10610	1	1	1	671.049	2010.13	3	2010.13	0.0005	1	33.39	0.00046	K	VLDTGFPIRIPVGAETLGR	I				File43 Spectrum13624 scans: 19377
2	1	GMOY001525-PA	hypothetical protein|protein_coding|scf7180000641491:115440-116963:-1|gene:GMOY001525	2194	54546	107	107	8	8	10611	1	1	1	671.05	2010.13	3	2010.13	0.0008	1	33.3	0.00047	K	VLDTGFPIRIPVGAETLGR	I				File43 Spectrum12538 scans: 17841
2	1	GMOY001525-PA	hypothetical protein|protein_coding|scf7180000641491:115440-116963:-1|gene:GMOY001525	2194	54546	107	107	8	8	10617	1	1	1	671.05	2010.13	3	2010.13	0.0023	1	34.9	0.00032	K	VLDTGFPIRIPVGAETLGR	I				File43 Spectrum12014 scans: 17129
2	1	GMOY001525-PA	hypothetical protein|protein_coding|scf7180000641491:115440-116963:-1|gene:GMOY001525	2194	54546	107	107	8	8	10618	1	1	1	671.05	2010.13	3	2010.13	0.0025	1	30.31	0.00093	K	VLDTGFPIRIPVGAETLGR	I				File43 Spectrum12650 scans: 17996
2	1	GMOY001525-PA	hypothetical protein|protein_coding|scf7180000641491:115440-116963:-1|gene:GMOY001525	2194	54546	107	107	8	8	10621	1	1	1	671.05	2010.13	3	2010.13	0.0032	1	34.73	0.00034	K	VLDTGFPIRIPVGAETLGR	I				File43 Spectrum12068 scans: 17202
2	1	GMOY001525-PA	hypothetical protein|protein_coding|scf7180000641491:115440-116963:-1|gene:GMOY001525	2194	54546	107	107	8	8	10622	1	1	1	671.051	2010.13	3	2010.13	0.0038	1	34.26	0.00037	K	VLDTGFPIRIPVGAETLGR	I				File43 Spectrum13226 scans: 18805
2	1	GMOY001525-PA	hypothetical protein|protein_coding|scf7180000641491:115440-116963:-1|gene:GMOY001525	2194	54546	107	107	8	8	10623	1	1	1	671.051	2010.13	3	2010.13	0.0045	1	44.3	3.7e-05	K	VLDTGFPIRIPVGAETLGR	I				File43 Spectrum13357 scans: 18993
2	1	GMOY001525-PA	hypothetical protein|protein_coding|scf7180000641491:115440-116963:-1|gene:GMOY001525	2194	54546	107	107	8	8	12138	1	1	1	751.361	2251.06	3	2251.06	-0.001	0	63.41	1.3e-06	R	IPSAVGYQPTLATDMGSMQER	I				File43 Spectrum7166 scans: 11268
2	1	GMOY001525-PA	hypothetical protein|protein_coding|scf7180000641491:115440-116963:-1|gene:GMOY001525	2194	54546	107	107	8	8	12139	1	1	1	1126.54	2251.06	2	2251.06	0.0006	0	71.15	2.3e-07	R	IPSAVGYQPTLATDMGSMQER	I				File43 Spectrum7152 scans: 11252
2	1	GMOY001525-PA	hypothetical protein|protein_coding|scf7180000641491:115440-116963:-1|gene:GMOY001525	2194	54546	107	107	8	8	12212	1	1	1	756.693	2267.06	3	2267.06	-0.0003	0	47.56	4.6e-05	R	IPSAVGYQPTLATDMGSMQER	I	Oxidation (M)	0.000000000000000001000.0		File43 Spectrum6051 scans: 9977	emPAI	1.02
2		GMOY007817-PA	hypothetical protein|protein_coding|scf7180000650671:1508803-1511091:-1|gene:GMOY007817	222	58623	5	5	2	2	4687	1	0	1	684.38	1366.75	2	1366.75	0.0006	0	57.8	4.1e-06	R	ILNVIGEPIDER	G				File43 Spectrum6487 scans: 10491
2		GMOY007817-PA	hypothetical protein|protein_coding|scf7180000650671:1508803-1511091:-1|gene:GMOY007817	222	58623	5	5	2	2	4688	1	0	1	684.38	1366.75	2	1366.75	0.0007	0	55.6	6.7e-06	R	ILNVIGEPIDER	G				File43 Spectrum6402 scans: 10389
2		GMOY007817-PA	hypothetical protein|protein_coding|scf7180000650671:1508803-1511091:-1|gene:GMOY007817	222	58623	5	5	2	2	4689	1	0	1	684.381	1366.75	2	1366.75	0.0016	0	52.53	1.4e-05	R	ILNVIGEPIDER	G				File43 Spectrum6318 scans: 10292
2		GMOY007817-PA	hypothetical protein|protein_coding|scf7180000650671:1508803-1511091:-1|gene:GMOY007817	222	58623	5	5	2	2	5205	1	0	1	718.38	1434.75	2	1434.75	-0.0009	0	78.92	6.7e-08	R	FTQAGSEVSALLGR	I				File43 Spectrum7416 scans: 11555
2		GMOY007817-PA	hypothetical protein|protein_coding|scf7180000650671:1508803-1511091:-1|gene:GMOY007817	222	58623	5	5	2	2	5206	1	0	1	718.381	1434.75	2	1434.75	0.0015	0	84.4	1.9e-08	R	FTQAGSEVSALLGR	I				File43 Spectrum7491 scans: 11645
3	1	GMOY007085-PA	hypothetical protein|protein_coding|scf7180000650090:80493-84134:-1|gene:GMOY007085	911	48871	43	43	6	6	1142	1	1	0	488.728	975.441	2	975.441	0.0003	0	63.14	1.6e-06	K	AGFAGDDAPR	A				File43 Spectrum947 scans: 3994
3	1	GMOY007085-PA	hypothetical protein|protein_coding|scf7180000650090:80493-84134:-1|gene:GMOY007085	911	48871	43	43	6	6	2586	1	1	0	566.766	1131.52	2	1131.52	-0.0017	0	53.99	1.4e-05	R	GYSFTTTAER	E				File43 Spectrum2612 scans: 5978
3	1	GMOY007085-PA	hypothetical protein|protein_coding|scf7180000650090:80493-84134:-1|gene:GMOY007085	911	48871	43	43	6	6	2587	1	1	0	566.767	1131.52	2	1131.52	0.0001	0	41.97	0.00026	R	GYSFTTTAER	E				File43 Spectrum18 scans: 94
3	1	GMOY007085-PA	hypothetical protein|protein_coding|scf7180000650090:80493-84134:-1|gene:GMOY007085	911	48871	43	43	6	6	2588	1	1	0	566.768	1131.52	2	1131.52	0.0007	0	32.81	0.0021	R	GYSFTTTAER	E				File43 Spectrum1 scans: 41
3	1	GMOY007085-PA	hypothetical protein|protein_coding|scf7180000650090:80493-84134:-1|gene:GMOY007085	911	48871	43	43	6	6	3129	1	1	0	599.855	1197.7	2	1197.7	-0.0027	0	45.04	5.3e-05	R	AVFPSIVGRPR	H				File43 Spectrum7425 scans: 11565
3	1	GMOY007085-PA	hypothetical protein|protein_coding|scf7180000650090:80493-84134:-1|gene:GMOY007085	911	48871	43	43	6	6	3176	1	1	0	599.856	1197.7	2	1197.7	-0.0001	0	31.79	0.0018	R	AVFPSIVGRPR	H				File43 Spectrum6110 scans: 10047
3	1	GMOY007085-PA	hypothetical protein|protein_coding|scf7180000650090:80493-84134:-1|gene:GMOY007085	911	48871	43	43	6	6	3177	1	1	0	599.856	1197.7	2	1197.7	-0.0001	0	32.57	0.0015	R	AVFPSIVGRPR	H				File43 Spectrum6027 scans: 9948
3	1	GMOY007085-PA	hypothetical protein|protein_coding|scf7180000650090:80493-84134:-1|gene:GMOY007085	911	48871	43	43	6	6	3182	1	1	0	599.856	1197.7	2	1197.7	0.0001	0	56.2	6.5e-06	R	AVFPSIVGRPR	H				File43 Spectrum5737 scans: 9609
3	1	GMOY007085-PA	hypothetical protein|protein_coding|scf7180000650090:80493-84134:-1|gene:GMOY007085	911	48871	43	43	6	6	3183	1	1	0	599.856	1197.7	2	1197.7	0.0002	0	33.6	0.0012	R	AVFPSIVGRPR	H				File43 Spectrum5818 scans: 9705
3	1	GMOY007085-PA	hypothetical protein|protein_coding|scf7180000650090:80493-84134:-1|gene:GMOY007085	911	48871	43	43	6	6	3185	1	1	0	599.857	1197.7	2	1197.7	0.0004	0	42.59	0.00015	R	AVFPSIVGRPR	H				File43 Spectrum6938 scans: 11005
3	1	GMOY007085-PA	hypothetical protein|protein_coding|scf7180000650090:80493-84134:-1|gene:GMOY007085	911	48871	43	43	6	6	3190	1	1	0	599.857	1197.7	2	1197.7	0.0006	0	35.96	0.00068	R	AVFPSIVGRPR	H				File43 Spectrum5467 scans: 9300
3	1	GMOY007085-PA	hypothetical protein|protein_coding|scf7180000650090:80493-84134:-1|gene:GMOY007085	911	48871	43	43	6	6	3191	1	1	0	599.857	1197.7	2	1197.7	0.0006	0	44.18	0.0001	R	AVFPSIVGRPR	H				File43 Spectrum7030 scans: 11109
3	1	GMOY007085-PA	hypothetical protein|protein_coding|scf7180000650090:80493-84134:-1|gene:GMOY007085	911	48871	43	43	6	6	3196	1	1	0	599.857	1197.7	2	1197.7	0.001	0	43.78	0.0001	R	AVFPSIVGRPR	H				File43 Spectrum6276 scans: 10242
3	1	GMOY007085-PA	hypothetical protein|protein_coding|scf7180000650090:80493-84134:-1|gene:GMOY007085	911	48871	43	43	6	6	3197	1	1	0	599.857	1197.7	2	1197.7	0.001	0	33.62	0.0011	R	AVFPSIVGRPR	H				File43 Spectrum7742 scans: 11944
3	1	GMOY007085-PA	hypothetical protein|protein_coding|scf7180000650090:80493-84134:-1|gene:GMOY007085	911	48871	43	43	6	6	3199	1	1	0	599.857	1197.7	2	1197.7	0.0012	0	44.78	8.2e-05	R	AVFPSIVGRPR	H				File43 Spectrum6200 scans: 10149
3	1	GMOY007085-PA	hypothetical protein|protein_coding|scf7180000650090:80493-84134:-1|gene:GMOY007085	911	48871	43	43	6	6	3201	1	1	0	599.857	1197.7	2	1197.7	0.0013	0	46.58	5.4e-05	R	AVFPSIVGRPR	H				File43 Spectrum5559 scans: 9403
3	1	GMOY007085-PA	hypothetical protein|protein_coding|scf7180000650090:80493-84134:-1|gene:GMOY007085	911	48871	43	43	6	6	3202	1	1	0	599.857	1197.7	2	1197.7	0.0013	0	35.12	0.00075	R	AVFPSIVGRPR	H				File43 Spectrum5653 scans: 9510
3	1	GMOY007085-PA	hypothetical protein|protein_coding|scf7180000650090:80493-84134:-1|gene:GMOY007085	911	48871	43	43	6	6	3203	1	1	0	599.857	1197.7	2	1197.7	0.0013	0	36.38	0.00056	R	AVFPSIVGRPR	H				File43 Spectrum6531 scans: 10541
3	1	GMOY007085-PA	hypothetical protein|protein_coding|scf7180000650090:80493-84134:-1|gene:GMOY007085	911	48871	43	43	6	6	3206	1	1	0	599.857	1197.7	2	1197.7	0.0016	0	44.36	9e-05	R	AVFPSIVGRPR	H				File43 Spectrum6359 scans: 10340
3	1	GMOY007085-PA	hypothetical protein|protein_coding|scf7180000650090:80493-84134:-1|gene:GMOY007085	911	48871	43	43	6	6	3208	1	1	0	599.857	1197.7	2	1197.7	0.0017	0	31.77	0.0016	R	AVFPSIVGRPR	H				File43 Spectrum5938 scans: 9845
3	1	GMOY007085-PA	hypothetical protein|protein_coding|scf7180000650090:80493-84134:-1|gene:GMOY007085	911	48871	43	43	6	6	8381	1	1	0	895.947	1789.88	2	1789.88	-0.0057	0	57.76	8.9e-06	K	SYELPDGQVITIGNER	F				File43 Spectrum6945 scans: 11013
3	1	GMOY007085-PA	hypothetical protein|protein_coding|scf7180000650090:80493-84134:-1|gene:GMOY007085	911	48871	43	43	6	6	8382	1	1	0	895.95	1789.88	2	1789.88	0.0001	0	71.87	3.3e-07	K	SYELPDGQVITIGNER	F				File43 Spectrum7901 scans: 12133
3	1	GMOY007085-PA	hypothetical protein|protein_coding|scf7180000650090:80493-84134:-1|gene:GMOY007085	911	48871	43	43	6	6	8383	1	1	0	597.637	1789.89	3	1789.88	0.0041	0	34.03	0.0021	K	SYELPDGQVITIGNER	F				File43 Spectrum7844 scans: 12063
3	1	GMOY007085-PA	hypothetical protein|protein_coding|scf7180000650090:80493-84134:-1|gene:GMOY007085	911	48871	43	43	6	6	8384	1	1	0	895.952	1789.89	2	1789.88	0.0054	0	81.02	4.2e-08	K	SYELPDGQVITIGNER	F				File43 Spectrum7825 scans: 12042
3	1	GMOY007085-PA	hypothetical protein|protein_coding|scf7180000650090:80493-84134:-1|gene:GMOY007085	911	48871	43	43	6	6	10092	1	1	0	977.534	1953.05	2	1953.06	-0.0026	0	49.03	4e-05	R	VAPEEHPVLLTEAPLNPK	A				File43 Spectrum6214 scans: 10164
3	1	GMOY007085-PA	hypothetical protein|protein_coding|scf7180000650090:80493-84134:-1|gene:GMOY007085	911	48871	43	43	6	6	10093	1	1	0	977.536	1953.06	2	1953.06	-0.0002	0	45.14	9e-05	R	VAPEEHPVLLTEAPLNPK	A				File43 Spectrum6039 scans: 9961
3	1	GMOY007085-PA	hypothetical protein|protein_coding|scf7180000650090:80493-84134:-1|gene:GMOY007085	911	48871	43	43	6	6	10095	1	1	0	977.537	1953.06	2	1953.06	0.0014	0	56.71	6.3e-06	R	VAPEEHPVLLTEAPLNPK	A				File43 Spectrum6121 scans: 10059
3	1	GMOY007085-PA	hypothetical protein|protein_coding|scf7180000650090:80493-84134:-1|gene:GMOY007085	911	48871	43	43	6	6	13719	1	1	1	856.058	2565.15	3	2565.16	-0.0108	0	35.39	0.00045	K	LCYVALDFEQEMATAASSSSLEK	S	Oxidation (M)	0.00000000000100000000000.0		File43 Spectrum14926 scans: 21297
3	1	GMOY007085-PA	hypothetical protein|protein_coding|scf7180000650090:80493-84134:-1|gene:GMOY007085	911	48871	43	43	6	6	13720	1	1	1	856.058	2565.15	3	2565.16	-0.0095	0	38.82	0.0002	K	LCYVALDFEQEMATAASSSSLEK	S	Oxidation (M)	0.00000000000100000000000.0		File43 Spectrum14790 scans: 21088
3	1	GMOY007085-PA	hypothetical protein|protein_coding|scf7180000650090:80493-84134:-1|gene:GMOY007085	911	48871	43	43	6	6	13721	1	1	1	1283.58	2565.15	2	2565.16	-0.0075	0	113.88	6.5e-12	K	LCYVALDFEQEMATAASSSSLEK	S	Oxidation (M)	0.00000000000100000000000.0		File43 Spectrum16055 scans: 23571
3	1	GMOY007085-PA	hypothetical protein|protein_coding|scf7180000650090:80493-84134:-1|gene:GMOY007085	911	48871	43	43	6	6	13722	1	1	1	856.059	2565.15	3	2565.16	-0.0075	0	31.88	0.001	K	LCYVALDFEQEMATAASSSSLEK	S	Oxidation (M)	0.00000000000100000000000.0		File43 Spectrum16081 scans: 23630
3	1	GMOY007085-PA	hypothetical protein|protein_coding|scf7180000650090:80493-84134:-1|gene:GMOY007085	911	48871	43	43	6	6	13724	1	1	1	856.06	2565.16	3	2565.16	-0.0044	0	31.6	0.0012	K	LCYVALDFEQEMATAASSSSLEK	S	Oxidation (M)	0.00000000000100000000000.0		File43 Spectrum15388 scans: 21988
3	1	GMOY007085-PA	hypothetical protein|protein_coding|scf7180000650090:80493-84134:-1|gene:GMOY007085	911	48871	43	43	6	6	13725	1	1	1	856.06	2565.16	3	2565.16	-0.0042	0	40.6	0.00015	K	LCYVALDFEQEMATAASSSSLEK	S	Oxidation (M)	0.00000000000100000000000.0		File43 Spectrum14694 scans: 20939
3	1	GMOY007085-PA	hypothetical protein|protein_coding|scf7180000650090:80493-84134:-1|gene:GMOY007085	911	48871	43	43	6	6	13726	1	1	1	856.06	2565.16	3	2565.16	-0.0031	0	46.85	3.5e-05	K	LCYVALDFEQEMATAASSSSLEK	S	Oxidation (M)	0.00000000000100000000000.0		File43 Spectrum15016 scans: 21433
3	1	GMOY007085-PA	hypothetical protein|protein_coding|scf7180000650090:80493-84134:-1|gene:GMOY007085	911	48871	43	43	6	6	13728	1	1	1	856.061	2565.16	3	2565.16	-0.0011	0	45.7	4.4e-05	K	LCYVALDFEQEMATAASSSSLEK	S	Oxidation (M)	0.00000000000100000000000.0		File43 Spectrum15517 scans: 22186
3	1	GMOY007085-PA	hypothetical protein|protein_coding|scf7180000650090:80493-84134:-1|gene:GMOY007085	911	48871	43	43	6	6	13729	1	1	1	856.061	2565.16	3	2565.16	-0.0005	0	40.35	0.00015	K	LCYVALDFEQEMATAASSSSLEK	S	Oxidation (M)	0.00000000000100000000000.0		File43 Spectrum15239 scans: 21772
3	1	GMOY007085-PA	hypothetical protein|protein_coding|scf7180000650090:80493-84134:-1|gene:GMOY007085	911	48871	43	43	6	6	13731	1	1	1	856.061	2565.16	3	2565.16	0.0006	0	41.39	0.00012	K	LCYVALDFEQEMATAASSSSLEK	S	Oxidation (M)	0.00000000000100000000000.0		File43 Spectrum15563 scans: 22257
3	1	GMOY007085-PA	hypothetical protein|protein_coding|scf7180000650090:80493-84134:-1|gene:GMOY007085	911	48871	43	43	6	6	13732	1	1	1	856.062	2565.16	3	2565.16	0.0013	0	79.53	2e-08	K	LCYVALDFEQEMATAASSSSLEK	S	Oxidation (M)	0.00000000000100000000000.0		File43 Spectrum16051 scans: 23567
3	1	GMOY007085-PA	hypothetical protein|protein_coding|scf7180000650090:80493-84134:-1|gene:GMOY007085	911	48871	43	43	6	6	13733	1	1	1	856.062	2565.16	3	2565.16	0.0026	0	36.91	0.00037	K	LCYVALDFEQEMATAASSSSLEK	S	Oxidation (M)	0.00000000000100000000000.0		File43 Spectrum16130 scans: 23726
3	1	GMOY007085-PA	hypothetical protein|protein_coding|scf7180000650090:80493-84134:-1|gene:GMOY007085	911	48871	43	43	6	6	13734	1	1	1	856.062	2565.16	3	2565.16	0.0031	0	52.29	1e-05	K	LCYVALDFEQEMATAASSSSLEK	S	Oxidation (M)	0.00000000000100000000000.0		File43 Spectrum15612 scans: 22329
3	1	GMOY007085-PA	hypothetical protein|protein_coding|scf7180000650090:80493-84134:-1|gene:GMOY007085	911	48871	43	43	6	6	13736	1	1	1	856.062	2565.17	3	2565.16	0.0037	0	40.12	0.00018	K	LCYVALDFEQEMATAASSSSLEK	S	Oxidation (M)	0.00000000000100000000000.0		File43 Spectrum15284 scans: 21841
3	1	GMOY007085-PA	hypothetical protein|protein_coding|scf7180000650090:80493-84134:-1|gene:GMOY007085	911	48871	43	43	6	6	13737	1	1	1	856.062	2565.17	3	2565.16	0.0037	0	51	1.5e-05	K	LCYVALDFEQEMATAASSSSLEK	S	Oxidation (M)	0.00000000000100000000000.0		File43 Spectrum15334 scans: 21912
3	1	GMOY007085-PA	hypothetical protein|protein_coding|scf7180000650090:80493-84134:-1|gene:GMOY007085	911	48871	43	43	6	6	13738	1	1	1	856.063	2565.17	3	2565.16	0.0052	0	57.52	3.4e-06	K	LCYVALDFEQEMATAASSSSLEK	S	Oxidation (M)	0.00000000000100000000000.0		File43 Spectrum15463 scans: 22104	emPAI	0.69
3	2	GMOY001776-PA	hypothetical protein|protein_coding|scf7180000642081:269290-271349:-1|gene:GMOY001776	531	42191	28	28	6	6	1142	1	0	0	488.728	975.441	2	975.441	0.0003	0	63.14	1.6e-06	K	AGFAGDDAPR	A				File43 Spectrum947 scans: 3994
3	2	GMOY001776-PA	hypothetical protein|protein_coding|scf7180000642081:269290-271349:-1|gene:GMOY001776	531	42191	28	28	6	6	2586	1	0	0	566.766	1131.52	2	1131.52	-0.0017	0	53.99	1.4e-05	R	GYSFTTTAER	E				File43 Spectrum2612 scans: 5978
3	2	GMOY001776-PA	hypothetical protein|protein_coding|scf7180000642081:269290-271349:-1|gene:GMOY001776	531	42191	28	28	6	6	2587	1	0	0	566.767	1131.52	2	1131.52	0.0001	0	41.97	0.00026	R	GYSFTTTAER	E				File43 Spectrum18 scans: 94
3	2	GMOY001776-PA	hypothetical protein|protein_coding|scf7180000642081:269290-271349:-1|gene:GMOY001776	531	42191	28	28	6	6	2588	1	0	0	566.768	1131.52	2	1131.52	0.0007	0	32.81	0.0021	R	GYSFTTTAER	E				File43 Spectrum1 scans: 41
3	2	GMOY001776-PA	hypothetical protein|protein_coding|scf7180000642081:269290-271349:-1|gene:GMOY001776	531	42191	28	28	6	6	2685	1	0	1	572.335	1142.66	2	1142.65	0.0013	0	33.55	0.0016	K	EITALAPSTIK	I				File43 Spectrum4566 scans: 8242
3	2	GMOY001776-PA	hypothetical protein|protein_coding|scf7180000642081:269290-271349:-1|gene:GMOY001776	531	42191	28	28	6	6	3129	1	0	0	599.855	1197.7	2	1197.7	-0.0027	0	45.04	5.3e-05	R	AVFPSIVGRPR	H				File43 Spectrum7425 scans: 11565
3	2	GMOY001776-PA	hypothetical protein|protein_coding|scf7180000642081:269290-271349:-1|gene:GMOY001776	531	42191	28	28	6	6	3176	1	0	0	599.856	1197.7	2	1197.7	-0.0001	0	31.79	0.0018	R	AVFPSIVGRPR	H				File43 Spectrum6110 scans: 10047
3	2	GMOY001776-PA	hypothetical protein|protein_coding|scf7180000642081:269290-271349:-1|gene:GMOY001776	531	42191	28	28	6	6	3177	1	0	0	599.856	1197.7	2	1197.7	-0.0001	0	32.57	0.0015	R	AVFPSIVGRPR	H				File43 Spectrum6027 scans: 9948
3	2	GMOY001776-PA	hypothetical protein|protein_coding|scf7180000642081:269290-271349:-1|gene:GMOY001776	531	42191	28	28	6	6	3182	1	0	0	599.856	1197.7	2	1197.7	0.0001	0	56.2	6.5e-06	R	AVFPSIVGRPR	H				File43 Spectrum5737 scans: 9609
3	2	GMOY001776-PA	hypothetical protein|protein_coding|scf7180000642081:269290-271349:-1|gene:GMOY001776	531	42191	28	28	6	6	3183	1	0	0	599.856	1197.7	2	1197.7	0.0002	0	33.6	0.0012	R	AVFPSIVGRPR	H				File43 Spectrum5818 scans: 9705
3	2	GMOY001776-PA	hypothetical protein|protein_coding|scf7180000642081:269290-271349:-1|gene:GMOY001776	531	42191	28	28	6	6	3185	1	0	0	599.857	1197.7	2	1197.7	0.0004	0	42.59	0.00015	R	AVFPSIVGRPR	H				File43 Spectrum6938 scans: 11005
3	2	GMOY001776-PA	hypothetical protein|protein_coding|scf7180000642081:269290-271349:-1|gene:GMOY001776	531	42191	28	28	6	6	3190	1	0	0	599.857	1197.7	2	1197.7	0.0006	0	35.96	0.00068	R	AVFPSIVGRPR	H				File43 Spectrum5467 scans: 9300
3	2	GMOY001776-PA	hypothetical protein|protein_coding|scf7180000642081:269290-271349:-1|gene:GMOY001776	531	42191	28	28	6	6	3191	1	0	0	599.857	1197.7	2	1197.7	0.0006	0	44.18	0.0001	R	AVFPSIVGRPR	H				File43 Spectrum7030 scans: 11109
3	2	GMOY001776-PA	hypothetical protein|protein_coding|scf7180000642081:269290-271349:-1|gene:GMOY001776	531	42191	28	28	6	6	3196	1	0	0	599.857	1197.7	2	1197.7	0.001	0	43.78	0.0001	R	AVFPSIVGRPR	H				File43 Spectrum6276 scans: 10242
3	2	GMOY001776-PA	hypothetical protein|protein_coding|scf7180000642081:269290-271349:-1|gene:GMOY001776	531	42191	28	28	6	6	3197	1	0	0	599.857	1197.7	2	1197.7	0.001	0	33.62	0.0011	R	AVFPSIVGRPR	H				File43 Spectrum7742 scans: 11944
3	2	GMOY001776-PA	hypothetical protein|protein_coding|scf7180000642081:269290-271349:-1|gene:GMOY001776	531	42191	28	28	6	6	3199	1	0	0	599.857	1197.7	2	1197.7	0.0012	0	44.78	8.2e-05	R	AVFPSIVGRPR	H				File43 Spectrum6200 scans: 10149
3	2	GMOY001776-PA	hypothetical protein|protein_coding|scf7180000642081:269290-271349:-1|gene:GMOY001776	531	42191	28	28	6	6	3201	1	0	0	599.857	1197.7	2	1197.7	0.0013	0	46.58	5.4e-05	R	AVFPSIVGRPR	H				File43 Spectrum5559 scans: 9403
3	2	GMOY001776-PA	hypothetical protein|protein_coding|scf7180000642081:269290-271349:-1|gene:GMOY001776	531	42191	28	28	6	6	3202	1	0	0	599.857	1197.7	2	1197.7	0.0013	0	35.12	0.00075	R	AVFPSIVGRPR	H				File43 Spectrum5653 scans: 9510
3	2	GMOY001776-PA	hypothetical protein|protein_coding|scf7180000642081:269290-271349:-1|gene:GMOY001776	531	42191	28	28	6	6	3203	1	0	0	599.857	1197.7	2	1197.7	0.0013	0	36.38	0.00056	R	AVFPSIVGRPR	H				File43 Spectrum6531 scans: 10541
3	2	GMOY001776-PA	hypothetical protein|protein_coding|scf7180000642081:269290-271349:-1|gene:GMOY001776	531	42191	28	28	6	6	3206	1	0	0	599.857	1197.7	2	1197.7	0.0016	0	44.36	9e-05	R	AVFPSIVGRPR	H				File43 Spectrum6359 scans: 10340
3	2	GMOY001776-PA	hypothetical protein|protein_coding|scf7180000642081:269290-271349:-1|gene:GMOY001776	531	42191	28	28	6	6	3208	1	0	0	599.857	1197.7	2	1197.7	0.0017	0	31.77	0.0016	R	AVFPSIVGRPR	H				File43 Spectrum5938 scans: 9845
3	2	GMOY001776-PA	hypothetical protein|protein_coding|scf7180000642081:269290-271349:-1|gene:GMOY001776	531	42191	28	28	6	6	8381	1	0	0	895.947	1789.88	2	1789.88	-0.0057	0	57.76	8.9e-06	K	SYELPDGQVITIGNER	F				File43 Spectrum6945 scans: 11013
3	2	GMOY001776-PA	hypothetical protein|protein_coding|scf7180000642081:269290-271349:-1|gene:GMOY001776	531	42191	28	28	6	6	8382	1	0	0	895.95	1789.88	2	1789.88	0.0001	0	71.87	3.3e-07	K	SYELPDGQVITIGNER	F				File43 Spectrum7901 scans: 12133
3	2	GMOY001776-PA	hypothetical protein|protein_coding|scf7180000642081:269290-271349:-1|gene:GMOY001776	531	42191	28	28	6	6	8383	1	0	0	597.637	1789.89	3	1789.88	0.0041	0	34.03	0.0021	K	SYELPDGQVITIGNER	F				File43 Spectrum7844 scans: 12063
3	2	GMOY001776-PA	hypothetical protein|protein_coding|scf7180000642081:269290-271349:-1|gene:GMOY001776	531	42191	28	28	6	6	8384	1	0	0	895.952	1789.89	2	1789.88	0.0054	0	81.02	4.2e-08	K	SYELPDGQVITIGNER	F				File43 Spectrum7825 scans: 12042
3	2	GMOY001776-PA	hypothetical protein|protein_coding|scf7180000642081:269290-271349:-1|gene:GMOY001776	531	42191	28	28	6	6	10092	1	0	0	977.534	1953.05	2	1953.06	-0.0026	0	49.03	4e-05	R	VAPEEHPVLLTEAPLNPK	A				File43 Spectrum6214 scans: 10164
3	2	GMOY001776-PA	hypothetical protein|protein_coding|scf7180000642081:269290-271349:-1|gene:GMOY001776	531	42191	28	28	6	6	10093	1	0	0	977.536	1953.06	2	1953.06	-0.0002	0	45.14	9e-05	R	VAPEEHPVLLTEAPLNPK	A				File43 Spectrum6039 scans: 9961
3	2	GMOY001776-PA	hypothetical protein|protein_coding|scf7180000642081:269290-271349:-1|gene:GMOY001776	531	42191	28	28	6	6	10095	1	0	0	977.537	1953.06	2	1953.06	0.0014	0	56.71	6.3e-06	R	VAPEEHPVLLTEAPLNPK	A				File43 Spectrum6121 scans: 10059	emPAI	0.7
4	1	GMOY008764-PA	hypothetical protein|protein_coding|scf7180000651536:25240-28076:-1|gene:GMOY008764	709	59624	27	27	11	11	58	1	1	1	362.228	722.441	2	722.444	-0.0034	0	42.5	5.6e-05	K	APGIIPR	V				File43 Spectrum2305 scans: 5594
4	1	GMOY008764-PA	hypothetical protein|protein_coding|scf7180000651536:25240-28076:-1|gene:GMOY008764	709	59624	27	27	11	11	378	1	1	1	408.235	814.456	2	814.455	0.0014	0	35.67	0.0012	R	ELIIGDR	Q				File43 Spectrum3050 scans: 6495
4	1	GMOY008764-PA	hypothetical protein|protein_coding|scf7180000651536:25240-28076:-1|gene:GMOY008764	709	59624	27	27	11	11	550	1	1	1	430.754	859.494	2	859.495	-0.0011	0	38.91	0.00069	R	QMSLLLR	R				File43 Spectrum5926 scans: 9831
4	1	GMOY008764-PA	hypothetical protein|protein_coding|scf7180000651536:25240-28076:-1|gene:GMOY008764	709	59624	27	27	11	11	551	1	1	1	430.755	859.494	2	859.495	-0.0006	0	42.38	0.00032	R	QMSLLLR	R				File43 Spectrum6007 scans: 9925
4	1	GMOY008764-PA	hypothetical protein|protein_coding|scf7180000651536:25240-28076:-1|gene:GMOY008764	709	59624	27	27	11	11	713	1	1	1	446.747	891.48	2	891.481	-0.0016	0	34.11	0.0024	K	LELAQYR	E				File43 Spectrum3215 scans: 6682
4	1	GMOY008764-PA	hypothetical protein|protein_coding|scf7180000651536:25240-28076:-1|gene:GMOY008764	709	59624	27	27	11	11	1336	1	1	1	500.793	999.571	2	999.571	0.0002	0	50.95	3.1e-05	R	VLSIGDGIAR	V				File43 Spectrum4708 scans: 8416
4	1	GMOY008764-PA	hypothetical protein|protein_coding|scf7180000651536:25240-28076:-1|gene:GMOY008764	709	59624	27	27	11	11	1337	1	1	1	500.793	999.572	2	999.571	0.0005	0	49.5	4.3e-05	R	VLSIGDGIAR	V				File43 Spectrum4792 scans: 8517
4	1	GMOY008764-PA	hypothetical protein|protein_coding|scf7180000651536:25240-28076:-1|gene:GMOY008764	709	59624	27	27	11	11	2443	1	1	1	374.244	1119.71	3	1119.71	-0.0033	1	38.4	0.00014	R	VGIKAPGIIPR	V				File43 Spectrum5756 scans: 9629
4	1	GMOY008764-PA	hypothetical protein|protein_coding|scf7180000651536:25240-28076:-1|gene:GMOY008764	709	59624	27	27	11	11	2444	1	1	1	374.244	1119.71	3	1119.71	-0.0028	1	64.08	3.9e-07	R	VGIKAPGIIPR	V				File43 Spectrum6137 scans: 10077
4	1	GMOY008764-PA	hypothetical protein|protein_coding|scf7180000651536:25240-28076:-1|gene:GMOY008764	709	59624	27	27	11	11	2445	1	1	1	374.244	1119.71	3	1119.71	-0.0027	1	56.82	2.1e-06	R	VGIKAPGIIPR	V				File43 Spectrum6010 scans: 9928
4	1	GMOY008764-PA	hypothetical protein|protein_coding|scf7180000651536:25240-28076:-1|gene:GMOY008764	709	59624	27	27	11	11	2446	1	1	1	374.244	1119.71	3	1119.71	-0.0022	1	60.93	8.1e-07	R	VGIKAPGIIPR	V				File43 Spectrum5335 scans: 9142
4	1	GMOY008764-PA	hypothetical protein|protein_coding|scf7180000651536:25240-28076:-1|gene:GMOY008764	709	59624	27	27	11	11	2447	1	1	1	374.244	1119.71	3	1119.71	-0.0022	1	60.29	9.4e-07	R	VGIKAPGIIPR	V				File43 Spectrum5418 scans: 9241
4	1	GMOY008764-PA	hypothetical protein|protein_coding|scf7180000651536:25240-28076:-1|gene:GMOY008764	709	59624	27	27	11	11	2448	1	1	1	374.244	1119.71	3	1119.71	-0.002	1	49.11	1.2e-05	R	VGIKAPGIIPR	V				File43 Spectrum5929 scans: 9834
4	1	GMOY008764-PA	hypothetical protein|protein_coding|scf7180000651536:25240-28076:-1|gene:GMOY008764	709	59624	27	27	11	11	2449	1	1	1	374.244	1119.71	3	1119.71	-0.0018	1	69.59	1.1e-07	R	VGIKAPGIIPR	V				File43 Spectrum5519 scans: 9357
4	1	GMOY008764-PA	hypothetical protein|protein_coding|scf7180000651536:25240-28076:-1|gene:GMOY008764	709	59624	27	27	11	11	2450	1	1	1	374.244	1119.71	3	1119.71	-0.0014	1	53.99	4e-06	R	VGIKAPGIIPR	V				File43 Spectrum5244 scans: 9037
4	1	GMOY008764-PA	hypothetical protein|protein_coding|scf7180000651536:25240-28076:-1|gene:GMOY008764	709	59624	27	27	11	11	2451	1	1	1	374.245	1119.71	3	1119.71	-0.0007	1	54.66	3.4e-06	R	VGIKAPGIIPR	V				File43 Spectrum5842 scans: 9732
4	1	GMOY008764-PA	hypothetical protein|protein_coding|scf7180000651536:25240-28076:-1|gene:GMOY008764	709	59624	27	27	11	11	2452	1	1	1	374.245	1119.71	3	1119.71	-0.0004	1	53.19	4.8e-06	R	VGIKAPGIIPR	V				File43 Spectrum4963 scans: 8715
4	1	GMOY008764-PA	hypothetical protein|protein_coding|scf7180000651536:25240-28076:-1|gene:GMOY008764	709	59624	27	27	11	11	2453	1	1	1	374.245	1119.71	3	1119.71	-0.0003	1	61.41	7.2e-07	R	VGIKAPGIIPR	V				File43 Spectrum5146 scans: 8926
4	1	GMOY008764-PA	hypothetical protein|protein_coding|scf7180000651536:25240-28076:-1|gene:GMOY008764	709	59624	27	27	11	11	2454	1	1	1	374.245	1119.71	3	1119.71	-0.0002	1	55.57	2.8e-06	R	VGIKAPGIIPR	V				File43 Spectrum5057 scans: 8821
4	1	GMOY008764-PA	hypothetical protein|protein_coding|scf7180000651536:25240-28076:-1|gene:GMOY008764	709	59624	27	27	11	11	2455	1	1	1	560.865	1119.71	2	1119.71	0.0016	1	41.57	7e-05	R	VGIKAPGIIPR	V				File43 Spectrum6128 scans: 10067
4	1	GMOY008764-PA	hypothetical protein|protein_coding|scf7180000651536:25240-28076:-1|gene:GMOY008764	709	59624	27	27	11	11	2457	1	1	1	374.245	1119.71	3	1119.71	0.0017	1	45.26	3e-05	R	VGIKAPGIIPR	V				File43 Spectrum6225 scans: 10179
4	1	GMOY008764-PA	hypothetical protein|protein_coding|scf7180000651536:25240-28076:-1|gene:GMOY008764	709	59624	27	27	11	11	2938	1	1	1	586.32	1170.63	2	1170.62	0.0009	0	59.97	5.5e-06	R	VVDALGNAIDGK	G				File43 Spectrum4286 scans: 7917
4	1	GMOY008764-PA	hypothetical protein|protein_coding|scf7180000651536:25240-28076:-1|gene:GMOY008764	709	59624	27	27	11	11	3234	1	1	1	602.315	1202.62	2	1202.61	0.0011	0	61.53	4.2e-06	R	GAEISSILEER	I				File43 Spectrum6177 scans: 10122
4	1	GMOY008764-PA	hypothetical protein|protein_coding|scf7180000651536:25240-28076:-1|gene:GMOY008764	709	59624	27	27	11	11	4126	1	1	1	650.876	1299.74	2	1299.74	-0.0013	0	44.24	0.00014	K	TALAIDTIINQK	R				File43 Spectrum7339 scans: 11467
4	1	GMOY008764-PA	hypothetical protein|protein_coding|scf7180000651536:25240-28076:-1|gene:GMOY008764	709	59624	27	27	11	11	4499	1	1	1	448.915	1343.72	3	1343.72	-0.0009	1	36.62	0.0012	R	VSVREPMQTGIK	A				File43 Spectrum2286 scans: 5570
4	1	GMOY008764-PA	hypothetical protein|protein_coding|scf7180000651536:25240-28076:-1|gene:GMOY008764	709	59624	27	27	11	11	6265	1	1	1	791.943	1581.87	2	1581.87	-0.0016	0	55.59	7.7e-06	R	TGAIVDVPVGSEILGR	V				File43 Spectrum8220 scans: 12510
4	1	GMOY008764-PA	hypothetical protein|protein_coding|scf7180000651536:25240-28076:-1|gene:GMOY008764	709	59624	27	27	11	11	6266	1	1	1	791.943	1581.87	2	1581.87	-0.0012	0	50.82	2.2e-05	R	TGAIVDVPVGSEILGR	V				File43 Spectrum8300 scans: 12607	emPAI	0.91
4		GMOY001949-PA	hypothetical protein|protein_coding|scf7180000642471:6195-8877:1|gene:GMOY001949	58	88652	3	3	2	2	378	1	0	1	408.235	814.456	2	814.455	0.0014	0	35.67	0.0012	R	ELIIGDR	Q				File43 Spectrum3050 scans: 6495
4		GMOY001949-PA	hypothetical protein|protein_coding|scf7180000642471:6195-8877:1|gene:GMOY001949	58	88652	3	3	2	2	550	1	0	1	430.754	859.494	2	859.495	-0.0011	0	38.91	0.00069	R	QMSLLLR	R				File43 Spectrum5926 scans: 9831
4		GMOY001949-PA	hypothetical protein|protein_coding|scf7180000642471:6195-8877:1|gene:GMOY001949	58	88652	3	3	2	2	551	1	0	1	430.755	859.494	2	859.495	-0.0006	0	42.38	0.00032	R	QMSLLLR	R				File43 Spectrum6007 scans: 9925
4		GMOY004407-PA	hypothetical protein|protein_coding|scf7180000648095:57479-71053:-1|gene:GMOY004407	42	393144	1	1	1	1	551	1	0	1	430.755	859.494	2	859.495	-0.0006	1	42.38	0.00032	R	KMEAILR	A				File43 Spectrum6007 scans: 9925
5	1	GMOY007063-PA	hypothetical protein|protein_coding|scf7180000650063:13373-14149:1|gene:GMOY007063	578	27857	20	20	6	6	1060	1	1	1	480.279	958.543	2	958.545	-0.0013	0	63.9	1.9e-06	K	SAEIAIISR	T				File43 Spectrum4760 scans: 8479
5	1	GMOY007063-PA	hypothetical protein|protein_coding|scf7180000650063:13373-14149:1|gene:GMOY007063	578	27857	20	20	6	6	1062	1	1	1	480.279	958.544	2	958.545	-0.0002	0	66.5	8.7e-07	K	SAEIAIISR	T				File43 Spectrum4420 scans: 8075
5	1	GMOY007063-PA	hypothetical protein|protein_coding|scf7180000650063:13373-14149:1|gene:GMOY007063	578	27857	20	20	6	6	1063	1	1	1	480.28	958.545	2	958.545	0.0002	0	83.45	1.8e-08	K	SAEIAIISR	T				File43 Spectrum4146 scans: 7759
5	1	GMOY007063-PA	hypothetical protein|protein_coding|scf7180000650063:13373-14149:1|gene:GMOY007063	578	27857	20	20	6	6	1064	1	1	1	480.28	958.545	2	958.545	0.0004	0	48.26	5.8e-05	K	SAEIAIISR	T				File43 Spectrum4334 scans: 7974
5	1	GMOY007063-PA	hypothetical protein|protein_coding|scf7180000650063:13373-14149:1|gene:GMOY007063	578	27857	20	20	6	6	1065	1	1	1	480.28	958.545	2	958.545	0.0004	0	86.7	8.3e-09	K	SAEIAIISR	T				File43 Spectrum4243 scans: 7869
5	1	GMOY007063-PA	hypothetical protein|protein_coding|scf7180000650063:13373-14149:1|gene:GMOY007063	578	27857	20	20	6	6	1066	1	1	1	480.28	958.545	2	958.545	0.0007	0	37.76	0.00065	K	SAEIAIISR	T				File43 Spectrum4859 scans: 8595
5	1	GMOY007063-PA	hypothetical protein|protein_coding|scf7180000650063:13373-14149:1|gene:GMOY007063	578	27857	20	20	6	6	1067	1	1	1	480.28	958.545	2	958.545	0.0008	0	70.87	3.2e-07	K	SAEIAIISR	T				File43 Spectrum4063 scans: 7663
5	1	GMOY007063-PA	hypothetical protein|protein_coding|scf7180000650063:13373-14149:1|gene:GMOY007063	578	27857	20	20	6	6	1068	1	1	1	480.28	958.546	2	958.545	0.001	0	68.01	6.2e-07	K	SAEIAIISR	T				File43 Spectrum3973 scans: 7559
5	1	GMOY007063-PA	hypothetical protein|protein_coding|scf7180000650063:13373-14149:1|gene:GMOY007063	578	27857	20	20	6	6	1285	1	1	1	495.759	989.504	2	989.503	0.0006	0	57.19	1.1e-05	R	IVGGSDSDIK	S				File43 Spectrum504 scans: 3412
5	1	GMOY007063-PA	hypothetical protein|protein_coding|scf7180000650063:13373-14149:1|gene:GMOY007063	578	27857	20	20	6	6	1286	1	1	1	495.76	989.505	2	989.503	0.0016	0	38.93	0.00095	R	IVGGSDSDIK	S				File43 Spectrum3985 scans: 7572
5	1	GMOY007063-PA	hypothetical protein|protein_coding|scf7180000650063:13373-14149:1|gene:GMOY007063	578	27857	20	20	6	6	1707	1	1	1	524.314	1046.61	2	1046.61	0.0005	1	33.14	0.00095	R	FSSKIQPIK	L				File43 Spectrum3552 scans: 7076
5	1	GMOY007063-PA	hypothetical protein|protein_coding|scf7180000650063:13373-14149:1|gene:GMOY007063	578	27857	20	20	6	6	2785	1	1	1	579.293	1156.57	2	1156.57	-0.0003	0	64.73	1.3e-06	K	TSHLLTSPNST	-				File43 Spectrum1536 scans: 4685
5	1	GMOY007063-PA	hypothetical protein|protein_coding|scf7180000650063:13373-14149:1|gene:GMOY007063	578	27857	20	20	6	6	2786	1	1	1	579.294	1156.57	2	1156.57	0.0015	0	53.93	1.5e-05	K	TSHLLTSPNST	-				File43 Spectrum1600 scans: 4770
5	1	GMOY007063-PA	hypothetical protein|protein_coding|scf7180000650063:13373-14149:1|gene:GMOY007063	578	27857	20	20	6	6	2787	1	1	1	579.294	1156.57	2	1156.57	0.0015	0	55.16	1.1e-05	K	TSHLLTSPNST	-				File43 Spectrum1690 scans: 4874
5	1	GMOY007063-PA	hypothetical protein|protein_coding|scf7180000650063:13373-14149:1|gene:GMOY007063	578	27857	20	20	6	6	3057	1	1	1	596.291	1190.57	2	1190.57	0.0001	0	60.08	6.2e-06	R	AGSSQWQSGGVK	I				File43 Spectrum807 scans: 3817
5	1	GMOY007063-PA	hypothetical protein|protein_coding|scf7180000650063:13373-14149:1|gene:GMOY007063	578	27857	20	20	6	6	3058	1	1	1	596.292	1190.57	2	1190.57	0.0007	0	40.2	0.00058	R	AGSSQWQSGGVK	I				File43 Spectrum734 scans: 3728
5	1	GMOY007063-PA	hypothetical protein|protein_coding|scf7180000650063:13373-14149:1|gene:GMOY007063	578	27857	20	20	6	6	3059	1	1	1	596.293	1190.57	2	1190.57	0.003	0	56.25	1.5e-05	R	AGSSQWQSGGVK	I				File43 Spectrum876 scans: 3905
5	1	GMOY007063-PA	hypothetical protein|protein_coding|scf7180000650063:13373-14149:1|gene:GMOY007063	578	27857	20	20	6	6	14176	1	1	1	889.073	2664.2	3	2664.2	-0.0006	0	34.39	0.00087	R	TNCASSAYSYGSSIKPSMICAAGPGK	S				File43 Spectrum5786 scans: 9666
5	1	GMOY007063-PA	hypothetical protein|protein_coding|scf7180000650063:13373-14149:1|gene:GMOY007063	578	27857	20	20	6	6	14177	1	1	1	889.074	2664.2	3	2664.2	0.0036	0	33.8	0.001	R	TNCASSAYSYGSSIKPSMICAAGPGK	S				File43 Spectrum5897 scans: 9799
5	1	GMOY007063-PA	hypothetical protein|protein_coding|scf7180000650063:13373-14149:1|gene:GMOY007063	578	27857	20	20	6	6	14178	1	1	1	889.075	2664.2	3	2664.2	0.0047	0	54.42	9e-06	R	TNCASSAYSYGSSIKPSMICAAGPGK	S				File43 Spectrum5703 scans: 9569	emPAI	0.97
6	1	GMOY004647-PA	hypothetical protein|protein_coding|scf7180000648171:146033-149609:-1|gene:GMOY004647	482	73250	21	21	2	2	2136	1	1	1	544.333	1086.65	2	1086.65	-0.0039	0	52.61	7.7e-06	R	AFGLAGALIVR	Q				File43 Spectrum12199 scans: 17381
6	1	GMOY004647-PA	hypothetical protein|protein_coding|scf7180000648171:146033-149609:-1|gene:GMOY004647	482	73250	21	21	2	2	2137	1	1	1	544.333	1086.65	2	1086.65	-0.0028	0	40.05	0.00013	R	AFGLAGALIVR	Q				File43 Spectrum12812 scans: 18230
6	1	GMOY004647-PA	hypothetical protein|protein_coding|scf7180000648171:146033-149609:-1|gene:GMOY004647	482	73250	21	21	2	2	2138	1	1	1	544.334	1086.65	2	1086.65	-0.0018	0	48.87	1.8e-05	R	AFGLAGALIVR	Q				File43 Spectrum14164 scans: 20146
6	1	GMOY004647-PA	hypothetical protein|protein_coding|scf7180000648171:146033-149609:-1|gene:GMOY004647	482	73250	21	21	2	2	2139	1	1	1	544.334	1086.65	2	1086.65	-0.0017	0	51.5	9.6e-06	R	AFGLAGALIVR	Q				File43 Spectrum12439 scans: 17704
6	1	GMOY004647-PA	hypothetical protein|protein_coding|scf7180000648171:146033-149609:-1|gene:GMOY004647	482	73250	21	21	2	2	2140	1	1	1	544.334	1086.65	2	1086.65	-0.0015	0	33.28	0.00063	R	AFGLAGALIVR	Q				File43 Spectrum12751 scans: 18142
6	1	GMOY004647-PA	hypothetical protein|protein_coding|scf7180000648171:146033-149609:-1|gene:GMOY004647	482	73250	21	21	2	2	2141	1	1	1	544.334	1086.65	2	1086.65	-0.0008	0	42.03	0.0001	R	AFGLAGALIVR	Q				File43 Spectrum12905 scans: 18354
6	1	GMOY004647-PA	hypothetical protein|protein_coding|scf7180000648171:146033-149609:-1|gene:GMOY004647	482	73250	21	21	2	2	2142	1	1	1	544.334	1086.65	2	1086.65	-0.0007	0	35.78	0.00044	R	AFGLAGALIVR	Q				File43 Spectrum13472 scans: 19167
6	1	GMOY004647-PA	hypothetical protein|protein_coding|scf7180000648171:146033-149609:-1|gene:GMOY004647	482	73250	21	21	2	2	2143	1	1	1	544.335	1086.65	2	1086.65	-0.0006	0	33.35	0.00076	R	AFGLAGALIVR	Q				File43 Spectrum12648 scans: 17993
6	1	GMOY004647-PA	hypothetical protein|protein_coding|scf7180000648171:146033-149609:-1|gene:GMOY004647	482	73250	21	21	2	2	2144	1	1	1	544.335	1086.66	2	1086.65	0.0009	0	37.35	0.00021	R	AFGLAGALIVR	Q				File43 Spectrum12585 scans: 17905
6	1	GMOY004647-PA	hypothetical protein|protein_coding|scf7180000648171:146033-149609:-1|gene:GMOY004647	482	73250	21	21	2	2	2145	1	1	1	544.335	1086.66	2	1086.65	0.0012	0	30.64	0.00099	R	AFGLAGALIVR	Q				File43 Spectrum14478 scans: 20616
6	1	GMOY004647-PA	hypothetical protein|protein_coding|scf7180000648171:146033-149609:-1|gene:GMOY004647	482	73250	21	21	2	2	2146	1	1	1	544.336	1086.66	2	1086.65	0.0014	0	49.41	1.3e-05	R	AFGLAGALIVR	Q				File43 Spectrum14300 scans: 20348
6	1	GMOY004647-PA	hypothetical protein|protein_coding|scf7180000648171:146033-149609:-1|gene:GMOY004647	482	73250	21	21	2	2	2147	1	1	1	544.336	1086.66	2	1086.65	0.0015	0	50.34	1.1e-05	R	AFGLAGALIVR	Q				File43 Spectrum11505 scans: 16463
6	1	GMOY004647-PA	hypothetical protein|protein_coding|scf7180000648171:146033-149609:-1|gene:GMOY004647	482	73250	21	21	2	2	2149	1	1	1	544.336	1086.66	2	1086.65	0.0023	0	41.08	9e-05	R	AFGLAGALIVR	Q				File43 Spectrum12533 scans: 17832
6	1	GMOY004647-PA	hypothetical protein|protein_coding|scf7180000648171:146033-149609:-1|gene:GMOY004647	482	73250	21	21	2	2	2150	1	1	1	544.336	1086.66	2	1086.65	0.0025	0	45.74	3.1e-05	R	AFGLAGALIVR	Q				File43 Spectrum11841 scans: 16899
6	1	GMOY004647-PA	hypothetical protein|protein_coding|scf7180000648171:146033-149609:-1|gene:GMOY004647	482	73250	21	21	2	2	2151	1	1	1	544.336	1086.66	2	1086.65	0.0026	0	34.03	0.00045	R	AFGLAGALIVR	Q				File43 Spectrum15569 scans: 22266
6	1	GMOY004647-PA	hypothetical protein|protein_coding|scf7180000648171:146033-149609:-1|gene:GMOY004647	482	73250	21	21	2	2	2152	1	1	1	544.336	1086.66	2	1086.65	0.003	0	48.71	1.5e-05	R	AFGLAGALIVR	Q				File43 Spectrum13399 scans: 19056
6	1	GMOY004647-PA	hypothetical protein|protein_coding|scf7180000648171:146033-149609:-1|gene:GMOY004647	482	73250	21	21	2	2	2153	1	1	1	544.336	1086.66	2	1086.65	0.0031	0	44.18	3.8e-05	R	AFGLAGALIVR	Q				File43 Spectrum13534 scans: 19250
6	1	GMOY004647-PA	hypothetical protein|protein_coding|scf7180000648171:146033-149609:-1|gene:GMOY004647	482	73250	21	21	2	2	2155	1	1	1	544.337	1086.66	2	1086.65	0.0041	0	41.99	6.3e-05	R	AFGLAGALIVR	Q				File43 Spectrum13319 scans: 18941
6	1	GMOY004647-PA	hypothetical protein|protein_coding|scf7180000648171:146033-149609:-1|gene:GMOY004647	482	73250	21	21	2	2	2156	1	1	1	544.337	1086.66	2	1086.65	0.0042	0	52.53	5.6e-06	R	AFGLAGALIVR	Q				File43 Spectrum12692 scans: 18056
6	1	GMOY004647-PA	hypothetical protein|protein_coding|scf7180000648171:146033-149609:-1|gene:GMOY004647	482	73250	21	21	2	2	3593	1	1	1	625.848	1249.68	2	1249.68	-0.0006	0	71.1	2.1e-07	R	YAQILNLYPR	F				File43 Spectrum7546 scans: 11710
6	1	GMOY004647-PA	hypothetical protein|protein_coding|scf7180000648171:146033-149609:-1|gene:GMOY004647	482	73250	21	21	2	2	3595	1	1	1	625.848	1249.68	2	1249.68	0.0001	0	75.17	8.1e-08	R	YAQILNLYPR	F				File43 Spectrum7619 scans: 11799	emPAI	0.09
7	1	GMOY002029-PA	hypothetical protein|protein_coding|scf7180000642607:3510-5697:-1|gene:GMOY002029	450	54466	10	10	4	4	1141	1	1	1	488.285	974.555	2	974.555	0.0004	0	51.72	2.8e-05	K	FAEIVQLR	L				File43 Spectrum5974 scans: 9886
7	1	GMOY002029-PA	hypothetical protein|protein_coding|scf7180000642607:3510-5697:-1|gene:GMOY002029	450	54466	10	10	4	4	2314	1	1	1	552.771	1103.53	2	1103.53	0.0002	0	67.13	9.8e-07	R	TPVSEDMLGR	V				File43 Spectrum3261 scans: 6737
7	1	GMOY002029-PA	hypothetical protein|protein_coding|scf7180000642607:3510-5697:-1|gene:GMOY002029	450	54466	10	10	4	4	2315	1	1	1	552.771	1103.53	2	1103.53	0.0003	0	63.41	2.4e-06	R	TPVSEDMLGR	V				File43 Spectrum3346 scans: 6835
7	1	GMOY002029-PA	hypothetical protein|protein_coding|scf7180000642607:3510-5697:-1|gene:GMOY002029	450	54466	10	10	4	4	4678	1	1	1	682.864	1363.71	2	1363.71	-0.0009	0	80.37	4.1e-08	R	IPASTLAEFYPR	D				File43 Spectrum7845 scans: 12065
7	1	GMOY002029-PA	hypothetical protein|protein_coding|scf7180000642607:3510-5697:-1|gene:GMOY002029	450	54466	10	10	4	4	4679	1	1	1	682.864	1363.71	2	1363.71	0.0005	0	80.77	3.6e-08	R	IPASTLAEFYPR	D				File43 Spectrum7757 scans: 11963
7	1	GMOY002029-PA	hypothetical protein|protein_coding|scf7180000642607:3510-5697:-1|gene:GMOY002029	450	54466	10	10	4	4	4680	1	1	1	682.864	1363.71	2	1363.71	0.0005	0	83.54	1.9e-08	R	IPASTLAEFYPR	D				File43 Spectrum7683 scans: 11874
7	1	GMOY002029-PA	hypothetical protein|protein_coding|scf7180000642607:3510-5697:-1|gene:GMOY002029	450	54466	10	10	4	4	9518	1	1	1	948.942	1895.87	2	1895.88	-0.0077	0	78.56	4.3e-08	R	GFPGYMYTDLATIYER	A				File43 Spectrum11088 scans: 15940
7	1	GMOY002029-PA	hypothetical protein|protein_coding|scf7180000642607:3510-5697:-1|gene:GMOY002029	450	54466	10	10	4	4	9519	1	1	1	948.943	1895.87	2	1895.88	-0.0049	0	49.85	3.2e-05	R	GFPGYMYTDLATIYER	A				File43 Spectrum10908 scans: 15716
7	1	GMOY002029-PA	hypothetical protein|protein_coding|scf7180000642607:3510-5697:-1|gene:GMOY002029	450	54466	10	10	4	4	9520	1	1	1	948.945	1895.88	2	1895.88	-0.0013	0	70.59	2.8e-07	R	GFPGYMYTDLATIYER	A				File43 Spectrum11018 scans: 15852
7	1	GMOY002029-PA	hypothetical protein|protein_coding|scf7180000642607:3510-5697:-1|gene:GMOY002029	450	54466	10	10	4	4	9521	1	1	1	948.946	1895.88	2	1895.88	0.0013	0	76.15	8e-08	R	GFPGYMYTDLATIYER	A				File43 Spectrum11081 scans: 15930	emPAI	0.26
8	1	GMOY011520-PA	hypothetical protein|protein_coding|scf7180000652170:6501426-6517991:1|gene:GMOY011520	323	220281	7	7	2	2	4785	1	1	1	687.872	1373.73	2	1373.73	-0.001	0	47.26	0.0001	R	AQIVDDLFNLAR	S				File43 Spectrum10702 scans: 15458
8	1	GMOY011520-PA	hypothetical protein|protein_coding|scf7180000652170:6501426-6517991:1|gene:GMOY011520	323	220281	7	7	2	2	4786	1	1	1	687.873	1373.73	2	1373.73	0.0003	0	34.48	0.0019	R	AQIVDDLFNLAR	S				File43 Spectrum11021 scans: 15855
8	1	GMOY011520-PA	hypothetical protein|protein_coding|scf7180000652170:6501426-6517991:1|gene:GMOY011520	323	220281	7	7	2	2	4787	1	1	1	687.873	1373.73	2	1373.73	0.0006	0	76.2	1.3e-07	R	AQIVDDLFNLAR	S				File43 Spectrum10837 scans: 15628
8	1	GMOY011520-PA	hypothetical protein|protein_coding|scf7180000652170:6501426-6517991:1|gene:GMOY011520	323	220281	7	7	2	2	4788	1	1	1	687.873	1373.73	2	1373.73	0.0012	0	53.76	2.3e-05	R	AQIVDDLFNLAR	S				File43 Spectrum10769 scans: 15543
8	1	GMOY011520-PA	hypothetical protein|protein_coding|scf7180000652170:6501426-6517991:1|gene:GMOY011520	323	220281	7	7	2	2	4789	1	1	1	687.874	1373.73	2	1373.73	0.0025	0	64.83	1.9e-06	R	AQIVDDLFNLAR	S				File43 Spectrum10906 scans: 15714
8	1	GMOY011520-PA	hypothetical protein|protein_coding|scf7180000652170:6501426-6517991:1|gene:GMOY011520	323	220281	7	7	2	2	5487	1	1	1	739.849	1477.68	2	1477.68	-0.0003	0	93.43	1.2e-09	R	LGTDTSNFASYFR	H				File43 Spectrum7846 scans: 12066
8	1	GMOY011520-PA	hypothetical protein|protein_coding|scf7180000652170:6501426-6517991:1|gene:GMOY011520	323	220281	7	7	2	2	5488	1	1	1	739.85	1477.69	2	1477.68	0.0018	0	112	1.8e-11	R	LGTDTSNFASYFR	H				File43 Spectrum7928 scans: 12164	emPAI	0.03
9	1	GMOY003579-PA	hypothetical protein|protein_coding|scf7180000646649:4089-72915:-1|gene:GMOY003579	300	98800	12	12	4	4	2805	1	1	1	387.211	1158.61	3	1158.61	-0.0048	1	32.58	0.003	K	FGDRIPADIR	I				File43 Spectrum4102 scans: 7706
9	1	GMOY003579-PA	hypothetical protein|protein_coding|scf7180000646649:4089-72915:-1|gene:GMOY003579	300	98800	12	12	4	4	3502	1	1	1	413.234	1236.68	3	1236.68	-0.0018	0	46.58	7.1e-05	R	LNIPVSEVNPR	E				File43 Spectrum4959 scans: 8710
9	1	GMOY003579-PA	hypothetical protein|protein_coding|scf7180000646649:4089-72915:-1|gene:GMOY003579	300	98800	12	12	4	4	3504	1	1	1	619.348	1236.68	2	1236.68	-0.0004	0	34.97	0.0011	R	LNIPVSEVNPR	E				File43 Spectrum4920 scans: 8665
9	1	GMOY003579-PA	hypothetical protein|protein_coding|scf7180000646649:4089-72915:-1|gene:GMOY003579	300	98800	12	12	4	4	3505	1	1	1	619.349	1236.68	2	1236.68	0.001	0	38.45	0.00051	R	LNIPVSEVNPR	E				File43 Spectrum5011 scans: 8769
9	1	GMOY003579-PA	hypothetical protein|protein_coding|scf7180000646649:4089-72915:-1|gene:GMOY003579	300	98800	12	12	4	4	4665	1	1	1	681.848	1361.68	2	1361.68	-0.0013	0	56.71	1.2e-05	R	FVGLMSMIDPPR	A				File43 Spectrum10698 scans: 15453
9	1	GMOY003579-PA	hypothetical protein|protein_coding|scf7180000646649:4089-72915:-1|gene:GMOY003579	300	98800	12	12	4	4	4666	1	1	1	681.85	1361.68	2	1361.68	0.001	0	64.53	2.4e-06	R	FVGLMSMIDPPR	A				File43 Spectrum10764 scans: 15537
9	1	GMOY003579-PA	hypothetical protein|protein_coding|scf7180000646649:4089-72915:-1|gene:GMOY003579	300	98800	12	12	4	4	4668	1	1	1	681.85	1361.68	2	1361.68	0.0015	0	62.17	4.1e-06	R	FVGLMSMIDPPR	A				File43 Spectrum10835 scans: 15625
9	1	GMOY003579-PA	hypothetical protein|protein_coding|scf7180000646649:4089-72915:-1|gene:GMOY003579	300	98800	12	12	4	4	4669	1	1	1	681.85	1361.69	2	1361.68	0.0017	0	47.94	0.00011	R	FVGLMSMIDPPR	A				File43 Spectrum10631 scans: 15370
9	1	GMOY003579-PA	hypothetical protein|protein_coding|scf7180000646649:4089-72915:-1|gene:GMOY003579	300	98800	12	12	4	4	4670	1	1	1	681.851	1361.69	2	1361.68	0.0032	0	56.42	1.4e-05	R	FVGLMSMIDPPR	A				File43 Spectrum10901 scans: 15708
9	1	GMOY003579-PA	hypothetical protein|protein_coding|scf7180000646649:4089-72915:-1|gene:GMOY003579	300	98800	12	12	4	4	4671	1	1	1	681.851	1361.69	2	1361.68	0.004	0	47.83	0.0001	R	FVGLMSMIDPPR	A				File43 Spectrum10977 scans: 15800
9	1	GMOY003579-PA	hypothetical protein|protein_coding|scf7180000646649:4089-72915:-1|gene:GMOY003579	300	98800	12	12	4	4	4847	1	1	1	695.347	1388.68	2	1388.68	0.0017	0	52.34	2.1e-05	R	DVSSDQLDEILR	Y				File43 Spectrum7642 scans: 11825
9	1	GMOY003579-PA	hypothetical protein|protein_coding|scf7180000646649:4089-72915:-1|gene:GMOY003579	300	98800	12	12	4	4	4848	1	1	1	695.347	1388.68	2	1388.68	0.0021	0	63.86	1.5e-06	R	DVSSDQLDEILR	Y				File43 Spectrum7563 scans: 11731	emPAI	0.18
10	1	GMOY005703-PA	hypothetical protein|protein_coding|scf7180000648716:31353-60252:-1|gene:GMOY005703	251	269181	10	10	6	6	1559	1	1	1	515.254	1028.49	2	1028.49	0.0003	0	34.8	0.00079	R	NYSTELFR	L				File43 Spectrum4965 scans: 8718
10	1	GMOY005703-PA	hypothetical protein|protein_coding|scf7180000648716:31353-60252:-1|gene:GMOY005703	251	269181	10	10	6	6	1661	1	1	1	522.295	1042.58	2	1042.58	-0.0017	0	45.86	0.00014	R	AQLELSQVR	Q				File43 Spectrum3290 scans: 6771
10	1	GMOY005703-PA	hypothetical protein|protein_coding|scf7180000648716:31353-60252:-1|gene:GMOY005703	251	269181	10	10	6	6	4768	1	1	1	687.339	1372.66	2	1372.66	0.0047	0	64.92	1.4e-06	R	ANALQNELEESR	T				File43 Spectrum3999 scans: 7588
10	1	GMOY005703-PA	hypothetical protein|protein_coding|scf7180000648716:31353-60252:-1|gene:GMOY005703	251	269181	10	10	6	6	5444	1	1	1	737.851	1473.69	2	1473.68	0.0029	0	60.13	3.5e-06	R	IEELEEEVEAER	Q				File43 Spectrum4677 scans: 8380
10	1	GMOY005703-PA	hypothetical protein|protein_coding|scf7180000648716:31353-60252:-1|gene:GMOY005703	251	269181	10	10	6	6	5970	1	1	1	510.594	1528.76	3	1528.76	0.001	1	38.1	0.00074	R	RANALQNELEESR	T				File43 Spectrum2800 scans: 6200
10	1	GMOY005703-PA	hypothetical protein|protein_coding|scf7180000648716:31353-60252:-1|gene:GMOY005703	251	269181	10	10	6	6	10080	1	1	1	976.987	1951.96	2	1951.96	-0.0008	0	73.92	1.7e-07	R	DLEEANIQHESTLANLR	K				File43 Spectrum5463 scans: 9295
10	1	GMOY005703-PA	hypothetical protein|protein_coding|scf7180000648716:31353-60252:-1|gene:GMOY005703	251	269181	10	10	6	6	10081	1	1	1	976.987	1951.96	2	1951.96	-0.0006	0	65.26	1.3e-06	R	DLEEANIQHESTLANLR	K				File43 Spectrum5556 scans: 9399
10	1	GMOY005703-PA	hypothetical protein|protein_coding|scf7180000648716:31353-60252:-1|gene:GMOY005703	251	269181	10	10	6	6	10082	1	1	1	651.661	1951.96	3	1951.96	0	0	36.76	0.0009	R	DLEEANIQHESTLANLR	K				File43 Spectrum5643 scans: 9499
10	1	GMOY005703-PA	hypothetical protein|protein_coding|scf7180000648716:31353-60252:-1|gene:GMOY005703	251	269181	10	10	6	6	10083	1	1	1	651.661	1951.96	3	1951.96	0	0	45.12	0.00013	R	DLEEANIQHESTLANLR	K				File43 Spectrum5724 scans: 9594
10	1	GMOY005703-PA	hypothetical protein|protein_coding|scf7180000648716:31353-60252:-1|gene:GMOY005703	251	269181	10	10	6	6	10084	1	1	1	651.661	1951.96	3	1951.96	0.0017	0	39.66	0.00046	R	DLEEANIQHESTLANLR	K				File43 Spectrum5545 scans: 9387	emPAI	0.09
11	1	GMOY008993-PA	hypothetical protein|protein_coding|scf7180000651745:221590-223660:1|gene:GMOY008993	231	68466	9	9	5	5	64	1	1	1	365.208	728.401	2	728.4	0.0005	0	32.85	0.0015	K	MIVNPR	G				File43 Spectrum1053 scans: 4120
11	1	GMOY008993-PA	hypothetical protein|protein_coding|scf7180000651745:221590-223660:1|gene:GMOY008993	231	68466	9	9	5	5	693	1	1	1	443.226	884.438	2	884.439	-0.001	0	35.83	0.0011	R	LASFYER	A				File43 Spectrum2873 scans: 6291
11	1	GMOY008993-PA	hypothetical protein|protein_coding|scf7180000651745:221590-223660:1|gene:GMOY008993	231	68466	9	9	5	5	694	1	1	1	443.227	884.439	2	884.439	-0.0006	0	39.11	0.00053	R	LASFYER	A				File43 Spectrum2960 scans: 6392
11	1	GMOY008993-PA	hypothetical protein|protein_coding|scf7180000651745:221590-223660:1|gene:GMOY008993	231	68466	9	9	5	5	832	1	1	1	456.767	911.519	2	911.519	0	0	33.12	0.0015	K	GVNVPSLAR	K				File43 Spectrum3665 scans: 7206
11	1	GMOY008993-PA	hypothetical protein|protein_coding|scf7180000651745:221590-223660:1|gene:GMOY008993	231	68466	9	9	5	5	5839	1	1	1	758.4	1514.79	2	1514.79	-0.001	0	63.89	1.9e-06	R	TALVANTSNMPVAAR	E				File43 Spectrum3908 scans: 7488
11	1	GMOY008993-PA	hypothetical protein|protein_coding|scf7180000651745:221590-223660:1|gene:GMOY008993	231	68466	9	9	5	5	5840	1	1	1	758.401	1514.79	2	1514.79	-0.0002	0	74.46	1.7e-07	R	TALVANTSNMPVAAR	E				File43 Spectrum4006 scans: 7597
11	1	GMOY008993-PA	hypothetical protein|protein_coding|scf7180000651745:221590-223660:1|gene:GMOY008993	231	68466	9	9	5	5	5841	1	1	1	505.937	1514.79	3	1514.79	0.0001	0	69.32	5.4e-07	R	TALVANTSNMPVAAR	E				File43 Spectrum3942 scans: 7525
11	1	GMOY008993-PA	hypothetical protein|protein_coding|scf7180000651745:221590-223660:1|gene:GMOY008993	231	68466	9	9	5	5	8217	1	1	1	891.429	1780.84	2	1780.85	-0.0013	0	44.43	0.00012	R	LAEMPADSGYPAYLGAR	L				File43 Spectrum6446 scans: 10440
11	1	GMOY008993-PA	hypothetical protein|protein_coding|scf7180000651745:221590-223660:1|gene:GMOY008993	231	68466	9	9	5	5	8218	1	1	1	891.43	1780.84	2	1780.85	-0.0007	0	64.98	1.1e-06	R	LAEMPADSGYPAYLGAR	L				File43 Spectrum6518 scans: 10527	emPAI	0.32
11		GMOY000743-PA	hypothetical protein|protein_coding|scf7180000640387:2866-4909:1|gene:GMOY000743	209	68480	6	6	3	3	832	1	0	1	456.767	911.519	2	911.519	0	0	33.12	0.0015	K	GVNVPALSR	T				File43 Spectrum3665 scans: 7206
11		GMOY000743-PA	hypothetical protein|protein_coding|scf7180000640387:2866-4909:1|gene:GMOY000743	209	68480	6	6	3	3	5839	1	0	1	758.4	1514.79	2	1514.79	-0.001	0	63.89	1.9e-06	R	TALVANTSNMPVAAR	E				File43 Spectrum3908 scans: 7488
11		GMOY000743-PA	hypothetical protein|protein_coding|scf7180000640387:2866-4909:1|gene:GMOY000743	209	68480	6	6	3	3	5840	1	0	1	758.401	1514.79	2	1514.79	-0.0002	0	74.46	1.7e-07	R	TALVANTSNMPVAAR	E				File43 Spectrum4006 scans: 7597
11		GMOY000743-PA	hypothetical protein|protein_coding|scf7180000640387:2866-4909:1|gene:GMOY000743	209	68480	6	6	3	3	5841	1	0	1	505.937	1514.79	3	1514.79	0.0001	0	69.32	5.4e-07	R	TALVANTSNMPVAAR	E				File43 Spectrum3942 scans: 7525
11		GMOY000743-PA	hypothetical protein|protein_coding|scf7180000640387:2866-4909:1|gene:GMOY000743	209	68480	6	6	3	3	8217	1	0	1	891.429	1780.84	2	1780.85	-0.0013	0	44.43	0.00012	R	LAEMPADSGYPAYLGAR	L				File43 Spectrum6446 scans: 10440
11		GMOY000743-PA	hypothetical protein|protein_coding|scf7180000640387:2866-4909:1|gene:GMOY000743	209	68480	6	6	3	3	8218	1	0	1	891.43	1780.84	2	1780.85	-0.0007	0	64.98	1.1e-06	R	LAEMPADSGYPAYLGAR	L				File43 Spectrum6518 scans: 10527
11		GMOY005064-PA	hypothetical protein|protein_coding|scf7180000648400:135771-137702:-1|gene:GMOY005064	167	71856	5	5	2	2	693	1	0	1	443.226	884.438	2	884.439	-0.001	0	35.83	0.0011	R	LASFYER	A				File43 Spectrum2873 scans: 6291
11		GMOY005064-PA	hypothetical protein|protein_coding|scf7180000648400:135771-137702:-1|gene:GMOY005064	167	71856	5	5	2	2	694	1	0	1	443.227	884.439	2	884.439	-0.0006	0	39.11	0.00053	R	LASFYER	A				File43 Spectrum2960 scans: 6392
11		GMOY005064-PA	hypothetical protein|protein_coding|scf7180000648400:135771-137702:-1|gene:GMOY005064	167	71856	5	5	2	2	5839	1	0	1	758.4	1514.79	2	1514.79	-0.001	0	63.89	1.9e-06	R	TALVANTSNMPVAAR	E				File43 Spectrum3908 scans: 7488
11		GMOY005064-PA	hypothetical protein|protein_coding|scf7180000648400:135771-137702:-1|gene:GMOY005064	167	71856	5	5	2	2	5840	1	0	1	758.401	1514.79	2	1514.79	-0.0002	0	74.46	1.7e-07	R	TALVANTSNMPVAAR	E				File43 Spectrum4006 scans: 7597
11		GMOY005064-PA	hypothetical protein|protein_coding|scf7180000648400:135771-137702:-1|gene:GMOY005064	167	71856	5	5	2	2	5841	1	0	1	505.937	1514.79	3	1514.79	0.0001	0	69.32	5.4e-07	R	TALVANTSNMPVAAR	E				File43 Spectrum3942 scans: 7525
12	1	GMOY009756-PA	hypothetical protein|protein_coding|scf7180000651876:8343-19013:-1|gene:GMOY009756	228	87088	9	9	4	4	449	1	1	1	416.719	831.424	2	831.424	0.0003	0	42.08	0.00033	R	LFENGPR	A				File43 Spectrum1508 scans: 4653
12	1	GMOY009756-PA	hypothetical protein|protein_coding|scf7180000651876:8343-19013:-1|gene:GMOY009756	228	87088	9	9	4	4	1353	1	1	1	501.786	1001.56	2	1001.56	-0.0009	0	60.97	6e-06	R	GLMGDLAVVK	L				File43 Spectrum6992 scans: 11067
12	1	GMOY009756-PA	hypothetical protein|protein_coding|scf7180000651876:8343-19013:-1|gene:GMOY009756	228	87088	9	9	4	4	1354	1	1	1	501.786	1001.56	2	1001.56	-0.0006	0	40.18	0.00072	R	GLMGDLAVVK	L				File43 Spectrum7095 scans: 11186
12	1	GMOY009756-PA	hypothetical protein|protein_coding|scf7180000651876:8343-19013:-1|gene:GMOY009756	228	87088	9	9	4	4	1355	1	1	1	501.786	1001.56	2	1001.56	-0.0005	0	42.19	0.00045	R	GLMGDLAVVK	L				File43 Spectrum7188 scans: 11293
12	1	GMOY009756-PA	hypothetical protein|protein_coding|scf7180000651876:8343-19013:-1|gene:GMOY009756	228	87088	9	9	4	4	1359	1	1	1	502.798	1003.58	2	1003.58	-0.0008	0	46.58	6.8e-05	R	LVGVANYIR	G				File43 Spectrum5605 scans: 9454
12	1	GMOY009756-PA	hypothetical protein|protein_coding|scf7180000651876:8343-19013:-1|gene:GMOY009756	228	87088	9	9	4	4	1360	1	1	1	502.798	1003.58	2	1003.58	-0.0001	0	55.45	1e-05	R	LVGVANYIR	G				File43 Spectrum5769 scans: 9645
12	1	GMOY009756-PA	hypothetical protein|protein_coding|scf7180000651876:8343-19013:-1|gene:GMOY009756	228	87088	9	9	4	4	1361	1	1	1	502.798	1003.58	2	1003.58	0.0004	0	48.53	4.9e-05	R	LVGVANYIR	G				File43 Spectrum5861 scans: 9755
12	1	GMOY009756-PA	hypothetical protein|protein_coding|scf7180000651876:8343-19013:-1|gene:GMOY009756	228	87088	9	9	4	4	1362	1	1	1	502.798	1003.58	2	1003.58	0.0005	0	51.12	2.7e-05	R	LVGVANYIR	G				File43 Spectrum5679 scans: 9542
12	1	GMOY009756-PA	hypothetical protein|protein_coding|scf7180000651876:8343-19013:-1|gene:GMOY009756	228	87088	9	9	4	4	5391	1	1	1	733.354	1464.69	2	1464.7	-0.0009	0	75.01	1.4e-07	R	IDESLLCLMTDR	V				File43 Spectrum9878 scans: 14464	emPAI	0.16
13	1	GMOY011773-PA	hypothetical protein|protein_coding|scf7180000652170:18794781-18853236:-1|gene:GMOY011773	211	497990	8	8	6	6	536	1	1	1	427.759	853.502	2	853.502	0.0003	0	32.9	0.00095	R	LEIPNIR	V				File43 Spectrum5537 scans: 9377
13	1	GMOY011773-PA	hypothetical protein|protein_coding|scf7180000652170:18794781-18853236:-1|gene:GMOY011773	211	497990	8	8	6	6	559	1	1	1	431.245	860.476	2	860.476	0.0005	0	37.18	0.0013	R	LIFESPR	K				File43 Spectrum4348 scans: 7990
13	1	GMOY011773-PA	hypothetical protein|protein_coding|scf7180000652170:18794781-18853236:-1|gene:GMOY011773	211	497990	8	8	6	6	2068	1	1	1	541.275	1080.54	2	1080.54	0.0011	0	74.91	2e-07	R	NSFAAYGVPR	A				File43 Spectrum4084 scans: 7686
13	1	GMOY011773-PA	hypothetical protein|protein_coding|scf7180000652170:18794781-18853236:-1|gene:GMOY011773	211	497990	8	8	6	6	3031	1	1	1	395.903	1184.69	3	1184.69	0.0006	1	43.64	0.00012	R	TAIRDVILER	S				File43 Spectrum4403 scans: 8054
13	1	GMOY011773-PA	hypothetical protein|protein_coding|scf7180000652170:18794781-18853236:-1|gene:GMOY011773	211	497990	8	8	6	6	3032	1	1	1	593.352	1184.69	2	1184.69	0.0013	1	43.91	0.0001	R	TAIRDVILER	S				File43 Spectrum4454 scans: 8113
13	1	GMOY011773-PA	hypothetical protein|protein_coding|scf7180000652170:18794781-18853236:-1|gene:GMOY011773	211	497990	8	8	6	6	3033	1	1	1	395.904	1184.69	3	1184.69	0.0016	1	45.18	7.4e-05	R	TAIRDVILER	S				File43 Spectrum4492 scans: 8157
13	1	GMOY011773-PA	hypothetical protein|protein_coding|scf7180000652170:18794781-18853236:-1|gene:GMOY011773	211	497990	8	8	6	6	8714	1	1	1	908.413	1814.81	2	1814.81	-0.0036	0	83.36	1e-08	R	VEDSGTYICEAVGYPR	H				File43 Spectrum5955 scans: 9863
13	1	GMOY011773-PA	hypothetical protein|protein_coding|scf7180000652170:18794781-18853236:-1|gene:GMOY011773	211	497990	8	8	6	6	11645	1	1	1	1070.02	2138.03	2	2138.03	0.0015	0	42.8	0.00017	R	EVVYIEPPSFNGEPGSYVR	L				File43 Spectrum8185 scans: 12470	emPAI	0.05
14	1	GMOY010150-PA	hypothetical protein|protein_coding|scf7180000652074:42013-44019:1|gene:GMOY010150	195	65547	5	5	2	2	5248	1	1	1	722.857	1443.7	2	1443.7	0	0	112.28	2.3e-11	R	LAAYSGTETTFQR	V				File43 Spectrum3303 scans: 6786
14	1	GMOY010150-PA	hypothetical protein|protein_coding|scf7180000652074:42013-44019:1|gene:GMOY010150	195	65547	5	5	2	2	12891	1	1	1	1196.61	2391.2	2	2391.2	0.0004	0	46.56	6.3e-05	R	SSYQMPTAIEPVFMPQLVTPR	F				File43 Spectrum11216 scans: 16098
14	1	GMOY010150-PA	hypothetical protein|protein_coding|scf7180000652074:42013-44019:1|gene:GMOY010150	195	65547	5	5	2	2	12892	1	1	1	798.073	2391.2	3	2391.2	0.001	0	42.87	0.00015	R	SSYQMPTAIEPVFMPQLVTPR	F				File43 Spectrum11139 scans: 16005
14	1	GMOY010150-PA	hypothetical protein|protein_coding|scf7180000652074:42013-44019:1|gene:GMOY010150	195	65547	5	5	2	2	12893	1	1	1	798.074	2391.2	3	2391.2	0.0027	0	39.16	0.00035	R	SSYQMPTAIEPVFMPQLVTPR	F				File43 Spectrum11214 scans: 16095
14	1	GMOY010150-PA	hypothetical protein|protein_coding|scf7180000652074:42013-44019:1|gene:GMOY010150	195	65547	5	5	2	2	12894	1	1	1	1196.61	2391.2	2	2391.2	0.0034	0	63.32	1.3e-06	R	SSYQMPTAIEPVFMPQLVTPR	F				File43 Spectrum11141 scans: 16007	emPAI	0.16
15	1	GMOY002950-PA	hypothetical protein|protein_coding|scf7180000644883:23579-25201:1|gene:GMOY002950	171	29631	6	6	2	2	979	1	1	1	473.225	944.435	2	944.435	-0.0001	0	43.92	8.9e-05	R	SGGPPPDYR	K				File43 Spectrum342 scans: 3171
15	1	GMOY002950-PA	hypothetical protein|protein_coding|scf7180000644883:23579-25201:1|gene:GMOY002950	171	29631	6	6	2	2	980	1	1	1	473.225	944.436	2	944.435	0.0006	0	50.78	2e-05	R	SGGPPPDYR	K				File43 Spectrum175 scans: 2857
15	1	GMOY002950-PA	hypothetical protein|protein_coding|scf7180000644883:23579-25201:1|gene:GMOY002950	171	29631	6	6	2	2	981	1	1	1	473.225	944.436	2	944.435	0.0009	0	49.33	2.7e-05	R	SGGPPPDYR	K				File43 Spectrum302 scans: 3103
15	1	GMOY002950-PA	hypothetical protein|protein_coding|scf7180000644883:23579-25201:1|gene:GMOY002950	171	29631	6	6	2	2	982	1	1	1	473.226	944.437	2	944.435	0.0015	0	43.78	0.00011	R	SGGPPPDYR	K				File43 Spectrum210 scans: 2926
15	1	GMOY002950-PA	hypothetical protein|protein_coding|scf7180000644883:23579-25201:1|gene:GMOY002950	171	29631	6	6	2	2	3061	1	1	1	596.31	1190.61	2	1190.6	0.0009	0	64.73	2e-06	K	YAGQNLAELGR	S				File43 Spectrum4028 scans: 7622
15	1	GMOY002950-PA	hypothetical protein|protein_coding|scf7180000644883:23579-25201:1|gene:GMOY002950	171	29631	6	6	2	2	3062	1	1	1	596.31	1190.61	2	1190.6	0.0011	0	50.02	5.9e-05	K	YAGQNLAELGR	S				File43 Spectrum4120 scans: 7727	emPAI	0.24
16	1	GMOY003481-PA	hypothetical protein|protein_coding|scf7180000646258:347269-349066:1|gene:GMOY003481	160	52610	5	5	2	2	1642	1	1	1	521.262	1040.51	2	1040.51	-0.001	1	33.46	0.0013	R	SSMYWLRV	-				File43 Spectrum9120 scans: 13559
16	1	GMOY003481-PA	hypothetical protein|protein_coding|scf7180000646258:347269-349066:1|gene:GMOY003481	160	52610	5	5	2	2	1643	1	1	1	521.262	1040.51	2	1040.51	-0.001	1	56.56	6.5e-06	R	SSMYWLRV	-				File43 Spectrum9203 scans: 13656
16	1	GMOY003481-PA	hypothetical protein|protein_coding|scf7180000646258:347269-349066:1|gene:GMOY003481	160	52610	5	5	2	2	1645	1	1	1	521.263	1040.51	2	1040.51	0.0001	1	40.69	0.00026	R	SSMYWLRV	-				File43 Spectrum9282 scans: 13750
16	1	GMOY003481-PA	hypothetical protein|protein_coding|scf7180000646258:347269-349066:1|gene:GMOY003481	160	52610	5	5	2	2	1646	1	1	1	521.263	1040.51	2	1040.51	0.0002	1	38.49	0.00043	R	SSMYWLRV	-				File43 Spectrum8938 scans: 13350
16	1	GMOY003481-PA	hypothetical protein|protein_coding|scf7180000646258:347269-349066:1|gene:GMOY003481	160	52610	5	5	2	2	4494	1	1	1	672.835	1343.66	2	1343.65	0.0012	0	100.25	4.4e-10	R	SQGGGVNNASNLAR	A				File43 Spectrum714 scans: 3703	emPAI	0.13
17	1	GMOY002377-PA	hypothetical protein|protein_coding|scf7180000643566:75824-106403:1|gene:GMOY002377	160	126931	5	5	5	5	2256	1	1	1	550.262	1098.51	2	1098.51	0.0008	0	47.93	4.5e-05	R	VSADFNQYR	H				File43 Spectrum2628 scans: 5997
17	1	GMOY002377-PA	hypothetical protein|protein_coding|scf7180000643566:75824-106403:1|gene:GMOY002377	160	126931	5	5	5	5	3422	1	1	1	615.323	1228.63	2	1228.63	0.0024	0	40.28	0.00035	R	LLQDDLEVER	E				File43 Spectrum4633 scans: 8323
17	1	GMOY002377-PA	hypothetical protein|protein_coding|scf7180000643566:75824-106403:1|gene:GMOY002377	160	126931	5	5	5	5	5294	1	1	1	725.861	1449.71	2	1449.71	-0.0024	0	58.69	7e-06	R	TVELQFEEAQTR	I				File43 Spectrum4784 scans: 8508
17	1	GMOY002377-PA	hypothetical protein|protein_coding|scf7180000643566:75824-106403:1|gene:GMOY002377	160	126931	5	5	5	5	6449	1	1	1	810.921	1619.83	2	1619.83	0.0002	0	68.29	9.1e-07	R	QLQTTLDQYGVAQR	R				File43 Spectrum4627 scans: 8315
17	1	GMOY002377-PA	hypothetical protein|protein_coding|scf7180000643566:75824-106403:1|gene:GMOY002377	160	126931	5	5	5	5	11970	1	1	1	1100.07	2198.12	2	2198.12	-0.0005	0	53.31	1.7e-05	R	TFVTTSTVPGSQVFIQETTR	T				File43 Spectrum8059 scans: 12325	emPAI	0.14
18	1	GMOY002634-PA	hypothetical protein|protein_coding|scf7180000644138:4406-8365:1|gene:GMOY002634	157	28676	4	4	3	3	4156	1	1	1	652.346	1302.68	2	1302.68	0.0001	0	81.67	2.9e-08	R	STVAGAVEEATLR	C				File43 Spectrum5266 scans: 9062
18	1	GMOY002634-PA	hypothetical protein|protein_coding|scf7180000644138:4406-8365:1|gene:GMOY002634	157	28676	4	4	3	3	4157	1	1	1	652.347	1302.68	2	1302.68	0.0012	0	86.22	9.8e-09	R	STVAGAVEEATLR	C				File43 Spectrum5168 scans: 8951
18	1	GMOY002634-PA	hypothetical protein|protein_coding|scf7180000644138:4406-8365:1|gene:GMOY002634	157	28676	4	4	3	3	5222	1	1	1	479.943	1436.81	3	1436.81	-0.0012	0	33.15	0.00097	R	LASQTVLGSGHLVR	D				File43 Spectrum3903 scans: 7482
18	1	GMOY002634-PA	hypothetical protein|protein_coding|scf7180000644138:4406-8365:1|gene:GMOY002634	157	28676	4	4	3	3	9958	1	1	1	649.997	1946.97	3	1946.97	0	0	40.25	0.00044	R	VMPNTPAVVQSGCSVFVR	G				File43 Spectrum6914 scans: 10977	emPAI	0.39
19	1	GMOY001240-PA	hypothetical protein|protein_coding|scf7180000641100:6003-82172:1|gene:GMOY001240	151	1918800	5	5	4	4	2629	1	1	1	568.771	1135.53	2	1135.53	-0.0015	0	63.48	1.5e-06	R	VTNATGMAESR	S				File43 Spectrum322 scans: 3137
19	1	GMOY001240-PA	hypothetical protein|protein_coding|scf7180000641100:6003-82172:1|gene:GMOY001240	151	1918800	5	5	4	4	5976	1	1	1	765.901	1529.79	2	1529.79	0.0008	0	55.49	1.3e-05	R	AINPLGEAVTTASMR	V				File43 Spectrum7302 scans: 11424
19	1	GMOY001240-PA	hypothetical protein|protein_coding|scf7180000641100:6003-82172:1|gene:GMOY001240	151	1918800	5	5	4	4	5977	1	1	1	510.937	1529.79	3	1529.79	0.001	0	33.89	0.0018	R	AINPLGEAVTTASMR	V				File43 Spectrum7328 scans: 11454
19	1	GMOY001240-PA	hypothetical protein|protein_coding|scf7180000641100:6003-82172:1|gene:GMOY001240	151	1918800	5	5	4	4	9190	1	1	1	932.514	1863.01	2	1863.01	-0.0017	0	49.8	2.1e-05	R	IIEPEPQPGPEIIYLR	H				File43 Spectrum8416 scans: 12759
19	1	GMOY001240-PA	hypothetical protein|protein_coding|scf7180000641100:6003-82172:1|gene:GMOY001240	151	1918800	5	5	4	4	9237	1	1	1	936.447	1870.88	2	1870.89	-0.0113	0	60.63	3e-06	R	EGEPITMSANAIGTPMPR	I				File43 Spectrum6405 scans: 10392	emPAI	0.01
19		GMOY001240-PB	hypothetical protein|protein_coding|scf7180000641100:12255-82172:1|gene:GMOY001240	60	1351193	2	2	1	1	5976	1	0	1	765.901	1529.79	2	1529.79	0.0008	0	55.49	1.3e-05	R	AINPLGEAVTTASMR	V				File43 Spectrum7302 scans: 11424
19		GMOY001240-PB	hypothetical protein|protein_coding|scf7180000641100:12255-82172:1|gene:GMOY001240	60	1351193	2	2	1	1	5977	1	0	1	510.937	1529.79	3	1529.79	0.001	0	33.89	0.0018	R	AINPLGEAVTTASMR	V				File43 Spectrum7328 scans: 11454
20	1	GMOY000207-PA	hypothetical protein|protein_coding|scf7180000639217:120157-120848:1|gene:GMOY000207	146	19959	3	3	1	1	4003	1	1	1	644.85	1287.68	2	1287.69	-0.0006	0	68.05	8.4e-07	R	MVDNEVLSILR	Q				File43 Spectrum9157 scans: 13603
20	1	GMOY000207-PA	hypothetical protein|protein_coding|scf7180000639217:120157-120848:1|gene:GMOY000207	146	19959	3	3	1	1	4004	1	1	1	644.85	1287.69	2	1287.69	0.0001	0	64.68	1.8e-06	R	MVDNEVLSILR	Q				File43 Spectrum9327 scans: 13802
20	1	GMOY000207-PA	hypothetical protein|protein_coding|scf7180000639217:120157-120848:1|gene:GMOY000207	146	19959	3	3	1	1	4005	1	1	1	644.85	1287.69	2	1287.69	0.0005	0	73.13	2.5e-07	R	MVDNEVLSILR	Q				File43 Spectrum9236 scans: 13696	emPAI	0.17
21	1	GMOY002421-PA	hypothetical protein|protein_coding|scf7180000643634:45290-47080:1|gene:GMOY002421	146	60924	4	4	3	3	680	1	1	1	442.29	882.564	2	882.565	-0.0005	0	70.34	9.2e-08	R	LAAGVALLR	V				File43 Spectrum5580 scans: 9427
21	1	GMOY002421-PA	hypothetical protein|protein_coding|scf7180000643634:45290-47080:1|gene:GMOY002421	146	60924	4	4	3	3	6393	1	1	1	805.45	1608.89	2	1608.88	0.0028	0	69.29	2.2e-07	R	AAVEEGIVPGGGTALLR	C				File43 Spectrum6999 scans: 11075
21	1	GMOY002421-PA	hypothetical protein|protein_coding|scf7180000643634:45290-47080:1|gene:GMOY002421	146	60924	4	4	3	3	6394	1	1	1	805.451	1608.89	2	1608.88	0.0031	0	42.02	0.00012	R	AAVEEGIVPGGGTALLR	C				File43 Spectrum7082 scans: 11171
21	1	GMOY002421-PA	hypothetical protein|protein_coding|scf7180000643634:45290-47080:1|gene:GMOY002421	146	60924	4	4	3	3	10215	1	1	1	984.051	1966.09	2	1966.08	0.0033	0	36.75	0.00033	K	ISSVQSIIPALELANQQR	K				File43 Spectrum9909 scans: 14500	emPAI	0.17
21		GMOY006640-PA	hypothetical protein|protein_coding|scf7180000649201:70742-72448:-1|gene:GMOY006640	70	60824	1	1	1	1	680	1	0	1	442.29	882.564	2	882.565	-0.0005	0	70.34	9.2e-08	R	LAAGVALLR	V				File43 Spectrum5580 scans: 9427
22	1	GMOY000226-PA	hypothetical protein|protein_coding|scf7180000639242:128371-131789:-1|gene:GMOY000226	145	97940	3	3	2	2	3370	1	1	1	610.804	1219.59	2	1219.59	-0.0014	0	57.94	9.1e-06	R	DLNSGVNAFQR	K				File43 Spectrum3905 scans: 7484
22	1	GMOY000226-PA	hypothetical protein|protein_coding|scf7180000639242:128371-131789:-1|gene:GMOY000226	145	97940	3	3	2	2	3371	1	1	1	610.804	1219.59	2	1219.59	-0.0003	0	58.75	7.9e-06	R	DLNSGVNAFQR	K				File43 Spectrum3813 scans: 7378
22	1	GMOY000226-PA	hypothetical protein|protein_coding|scf7180000639242:128371-131789:-1|gene:GMOY000226	145	97940	3	3	2	2	5489	1	1	1	740.329	1478.64	2	1478.64	0.0008	0	82.17	1.1e-08	R	GITGMSDESNAQNR	G				File43 Spectrum994 scans: 4050	emPAI	0.07
23	1	GMOY000176-PA	hypothetical protein|protein_coding|scf7180000639142:1109-6491:1|gene:GMOY000176	142	97851	4	4	2	2	6350	1	1	1	801.411	1600.81	2	1600.81	-0.0049	0	59.43	5.2e-06	R	AVLVDLEPGTMDSVR	S				File43 Spectrum7523 scans: 11684
23	1	GMOY000176-PA	hypothetical protein|protein_coding|scf7180000639142:1109-6491:1|gene:GMOY000176	142	97851	4	4	2	2	6352	1	1	1	801.414	1600.81	2	1600.81	0.0009	0	45.73	0.00012	R	AVLVDLEPGTMDSVR	S				File43 Spectrum7598 scans: 11775
23	1	GMOY000176-PA	hypothetical protein|protein_coding|scf7180000639142:1109-6491:1|gene:GMOY000176	142	97851	4	4	2	2	6417	1	1	1	808.42	1614.83	2	1614.83	-0.0024	0	57.56	8.8e-06	R	AILVDLEPGTMDSVR	S				File43 Spectrum8257 scans: 12550
23	1	GMOY000176-PA	hypothetical protein|protein_coding|scf7180000639142:1109-6491:1|gene:GMOY000176	142	97851	4	4	2	2	6418	1	1	1	808.422	1614.83	2	1614.83	0.0012	0	66.94	9.9e-07	R	AILVDLEPGTMDSVR	S				File43 Spectrum8160 scans: 12442	emPAI	0.07
23		GMOY000119-PA	hypothetical protein|protein_coding|scf7180000639039:1148-2730:-1|gene:GMOY000119	95	50441	2	2	1	1	6417	1	0	1	808.42	1614.83	2	1614.83	-0.0024	0	57.56	8.8e-06	R	AILVDLEPGTMDSVR	S				File43 Spectrum8257 scans: 12550
23		GMOY000119-PA	hypothetical protein|protein_coding|scf7180000639039:1148-2730:-1|gene:GMOY000119	95	50441	2	2	1	1	6418	1	0	1	808.422	1614.83	2	1614.83	0.0012	0	66.94	9.9e-07	R	AILVDLEPGTMDSVR	S				File43 Spectrum8160 scans: 12442
23		GMOY000148-PA	hypothetical protein|protein_coding|scf7180000639097:26770-31615:-1|gene:GMOY000148	76	50585	2	2	1	1	6350	1	0	1	801.411	1600.81	2	1600.81	-0.0049	0	59.43	5.2e-06	R	AVLVDLEPGTMDSVR	S				File43 Spectrum7523 scans: 11684
23		GMOY000148-PA	hypothetical protein|protein_coding|scf7180000639097:26770-31615:-1|gene:GMOY000148	76	50585	2	2	1	1	6352	1	0	1	801.414	1600.81	2	1600.81	0.0009	0	45.73	0.00012	R	AVLVDLEPGTMDSVR	S				File43 Spectrum7598 scans: 11775
24	1	GMOY008757-PA	hypothetical protein|protein_coding|scf7180000651525:26578-58638:1|gene:GMOY008757	140	190035	2	2	2	2	4545	1	1	1	676.292	1350.57	2	1350.57	-0.0002	0	67.94	1.8e-07	R	SSYQSSYESSAR	S				File43 Spectrum500 scans: 3406
24	1	GMOY008757-PA	hypothetical protein|protein_coding|scf7180000651525:26578-58638:1|gene:GMOY008757	140	190035	2	2	2	2	12959	1	1	1	1203.07	2404.12	2	2404.11	0.0015	0	97.03	5.2e-10	R	TSTTGGGPGGYSYSSTTSGVLPGGTR	Y				File43 Spectrum4632 scans: 8322	emPAI	0.03
25	1	GMOY008378-PA	hypothetical protein|protein_coding|scf7180000651191:77674-77853:1|gene:GMOY008378	137	7009	2	2	1	1	5012	1	1	1	703.798	1405.58	2	1405.58	-0.0016	0	80.35	9.2e-09	R	DSGDYEMITGYR	A				File43 Spectrum5382 scans: 9200
25	1	GMOY008378-PA	hypothetical protein|protein_coding|scf7180000651191:77674-77853:1|gene:GMOY008378	137	7009	2	2	1	1	5013	1	1	1	703.799	1405.58	2	1405.58	0.0011	0	79.79	1e-08	R	DSGDYEMITGYR	A				File43 Spectrum5466 scans: 9299	emPAI	0.51
26	1	GMOY012131-PA	hypothetical protein|protein_coding|scf7180000652160:5259569-5261264:-1|gene:GMOY012131	137	59736	3	3	2	2	3736	1	1	1	632.338	1262.66	2	1262.66	-0.0008	0	57	1.2e-05	R	IYAGQIINSER	A				File43 Spectrum4085 scans: 7687
26	1	GMOY012131-PA	hypothetical protein|protein_coding|scf7180000652160:5259569-5261264:-1|gene:GMOY012131	137	59736	3	3	2	2	3737	1	1	1	632.339	1262.66	2	1262.66	0.0014	0	58.29	8.7e-06	R	IYAGQIINSER	A				File43 Spectrum3975 scans: 7561
26	1	GMOY012131-PA	hypothetical protein|protein_coding|scf7180000652160:5259569-5261264:-1|gene:GMOY012131	137	59736	3	3	2	2	4923	1	1	1	698.316	1394.62	2	1394.62	0.001	0	78.72	3e-08	R	MGTVQEMDESIR	A				File43 Spectrum4197 scans: 7817	emPAI	0.11
27	1	GMOY000267-PA	hypothetical protein|protein_coding|scf7180000639349:12-385:1|gene:GMOY000267	137	13141	5	5	2	2	521	1	1	1	425.766	849.518	2	849.518	-0.0006	0	30.82	0.00083	R	HLQLAIR	N				File43 Spectrum2999 scans: 6438
27	1	GMOY000267-PA	hypothetical protein|protein_coding|scf7180000639349:12-385:1|gene:GMOY000267	137	13141	5	5	2	2	522	1	1	1	425.766	849.518	2	849.518	-0.0004	0	30.77	0.00084	R	HLQLAIR	N				File43 Spectrum3112 scans: 6566
27	1	GMOY000267-PA	hypothetical protein|protein_coding|scf7180000639349:12-385:1|gene:GMOY000267	137	13141	5	5	2	2	976	1	1	1	472.769	943.524	2	943.524	0	0	61.6	2.7e-06	R	AGLQFPVGR	I				File43 Spectrum5503 scans: 9340
27	1	GMOY000267-PA	hypothetical protein|protein_coding|scf7180000639349:12-385:1|gene:GMOY000267	137	13141	5	5	2	2	977	1	1	1	472.769	943.524	2	943.524	0.0002	0	67.28	7.2e-07	R	AGLQFPVGR	I				File43 Spectrum5341 scans: 9149
27	1	GMOY000267-PA	hypothetical protein|protein_coding|scf7180000639349:12-385:1|gene:GMOY000267	137	13141	5	5	2	2	978	1	1	1	472.769	943.524	2	943.524	0.0003	0	50.17	3.7e-05	R	AGLQFPVGR	I				File43 Spectrum5419 scans: 9243	emPAI	0.59
28	1	GMOY003541-PA	hypothetical protein|protein_coding|scf7180000646489:3473-3919:-1|gene:GMOY003541	136	16793	4	4	2	2	1203	1	1	1	492.795	983.576	2	983.576	-0.0009	0	74.25	7.1e-08	R	VNDIALAIR	W				File43 Spectrum5306 scans: 9109
28	1	GMOY003541-PA	hypothetical protein|protein_coding|scf7180000646489:3473-3919:-1|gene:GMOY003541	136	16793	4	4	2	2	1205	1	1	1	492.796	983.576	2	983.576	0	0	61.98	1e-06	R	VNDIALAIR	W				File43 Spectrum5387 scans: 9206
28	1	GMOY003541-PA	hypothetical protein|protein_coding|scf7180000646489:3473-3919:-1|gene:GMOY003541	136	16793	4	4	2	2	2672	1	1	1	570.846	1139.68	2	1139.68	0	1	33.85	0.00078	R	RVNDIALAIR	W				File43 Spectrum4556 scans: 8231
28	1	GMOY003541-PA	hypothetical protein|protein_coding|scf7180000646489:3473-3919:-1|gene:GMOY003541	136	16793	4	4	2	2	2673	1	1	1	570.846	1139.68	2	1139.68	0.0006	1	39.26	0.00014	R	RVNDIALAIR	W				File43 Spectrum4468 scans: 8128	emPAI	0.44
29	1	GMOY001277-PA	hypothetical protein|protein_coding|scf7180000641192:60782-74961:-1|gene:GMOY001277	135	100736	4	4	3	3	3253	1	1	1	604.291	1206.57	2	1206.57	0.0005	0	65.11	1.4e-06	R	NSGLNDMITSR	K				File43 Spectrum3709 scans: 7256
29	1	GMOY001277-PA	hypothetical protein|protein_coding|scf7180000641192:60782-74961:-1|gene:GMOY001277	135	100736	4	4	3	3	4683	1	1	1	683.346	1364.68	2	1364.68	0.0009	0	44.99	0.00018	K	TTAYNLLGEPMR	F				File43 Spectrum6581 scans: 10597
29	1	GMOY001277-PA	hypothetical protein|protein_coding|scf7180000641192:60782-74961:-1|gene:GMOY001277	135	100736	4	4	3	3	9183	1	1	1	931.986	1861.96	2	1861.96	0	0	72.39	2e-07	R	INSYQVPLSLSPEPYR	Y				File43 Spectrum7812 scans: 12027
29	1	GMOY001277-PA	hypothetical protein|protein_coding|scf7180000641192:60782-74961:-1|gene:GMOY001277	135	100736	4	4	3	3	9184	1	1	1	621.66	1861.96	3	1861.96	0.0002	0	34.72	0.0012	R	INSYQVPLSLSPEPYR	Y				File43 Spectrum7836 scans: 12055	emPAI	0.14
30	1	GMOY000466-PA	hypothetical protein|protein_coding|scf7180000639890:92541-96329:-1|gene:GMOY000466	131	29286	3	3	2	2	4842	1	1	1	694.862	1387.71	2	1387.71	0.0007	0	70.53	6e-07	R	LWLGGTDLATEGR	Y				File43 Spectrum7204 scans: 11312
30	1	GMOY000466-PA	hypothetical protein|protein_coding|scf7180000639890:92541-96329:-1|gene:GMOY000466	131	29286	3	3	2	2	4844	1	1	1	694.863	1387.71	2	1387.71	0.0012	0	65.91	1.7e-06	R	LWLGGTDLATEGR	Y				File43 Spectrum7114 scans: 11209
30	1	GMOY000466-PA	hypothetical protein|protein_coding|scf7180000639890:92541-96329:-1|gene:GMOY000466	131	29286	3	3	2	2	7389	1	1	1	857.853	1713.69	2	1713.69	-0.0021	0	45.89	2.6e-05	R	ESEFEWNDNVCGTK	M				File43 Spectrum5263 scans: 9058	emPAI	0.24
31	1	GMOY010278-PA	hypothetical protein|protein_coding|scf7180000652113:88443-106052:-1|gene:GMOY010278	131	37087	3	3	1	1	6133	1	1	1	777.374	1552.73	2	1552.73	-0.0006	0	34.87	0.0014	R	VFFDMTADGQPLGR	I				File43 Spectrum8029 scans: 12290
31	1	GMOY010278-PA	hypothetical protein|protein_coding|scf7180000652113:88443-106052:-1|gene:GMOY010278	131	37087	3	3	1	1	6134	1	1	1	777.375	1552.73	2	1552.73	-0.0001	0	77	8.5e-08	R	VFFDMTADGQPLGR	I				File43 Spectrum8114 scans: 12389
31	1	GMOY010278-PA	hypothetical protein|protein_coding|scf7180000652113:88443-106052:-1|gene:GMOY010278	131	37087	3	3	1	1	6137	1	1	1	777.375	1552.73	2	1552.73	0.0003	0	76.1	9.6e-08	R	VFFDMTADGQPLGR	I				File43 Spectrum8199 scans: 12487	emPAI	0.09
32	1	GMOY005468-PA	hypothetical protein|protein_coding|scf7180000648602:77072-82820:-1|gene:GMOY005468	130	85149	2	2	2	2	5243	1	1	1	722.385	1442.75	2	1442.76	-0.0005	0	59.48	6.1e-06	R	IMVQNIDDVLQR	G				File43 Spectrum7578 scans: 11749
32	1	GMOY005468-PA	hypothetical protein|protein_coding|scf7180000648602:77072-82820:-1|gene:GMOY005468	130	85149	2	2	2	2	6867	1	1	1	828.937	1655.86	2	1655.86	0.0006	0	98.2	4.9e-10	R	NINTINTQLQDVQR	I				File43 Spectrum4618 scans: 8305	emPAI	0.08
33	1	GMOY004743-PA	hypothetical protein|protein_coding|scf7180000648218:36720-39514:1|gene:GMOY004743	126	83266	3	3	2	2	1187	1	1	1	492.251	982.487	2	982.487	-0.0002	0	40.88	0.00043	R	FVDQFTAR	R				File43 Spectrum3367 scans: 6859
33	1	GMOY004743-PA	hypothetical protein|protein_coding|scf7180000648218:36720-39514:1|gene:GMOY004743	126	83266	3	3	2	2	4826	1	1	1	694.319	1386.62	2	1386.62	0.0001	0	68.97	2.2e-07	R	ISQEGQYMFER	M				File43 Spectrum4376 scans: 8022
33	1	GMOY004743-PA	hypothetical protein|protein_coding|scf7180000648218:36720-39514:1|gene:GMOY004743	126	83266	3	3	2	2	4827	1	1	1	694.319	1386.62	2	1386.62	0.0006	0	66.02	4.4e-07	R	ISQEGQYMFER	M				File43 Spectrum4288 scans: 7919	emPAI	0.08
34	1	GMOY003176-PA	hypothetical protein|protein_coding|scf7180000645539:55852-74333:-1|gene:GMOY003176	118	41494	4	4	3	3	1641	1	1	1	521.262	1040.51	2	1040.51	0.0017	0	71.05	2.6e-07	R	SPSPMVGPNR	V				File43 Spectrum978 scans: 4032
34	1	GMOY003176-PA	hypothetical protein|protein_coding|scf7180000645539:55852-74333:-1|gene:GMOY003176	118	41494	4	4	3	3	4805	1	1	1	689.337	1376.66	2	1376.66	0.0018	0	39.58	0.00046	R	SIFDEPVTAQDR	V				File43 Spectrum5070 scans: 8836
34	1	GMOY003176-PA	hypothetical protein|protein_coding|scf7180000645539:55852-74333:-1|gene:GMOY003176	118	41494	4	4	3	3	5263	1	1	1	724.375	1446.74	2	1446.74	0.0001	0	44.13	0.00022	R	ASSLEPLDELFAR	K				File43 Spectrum10294 scans: 14957
34	1	GMOY003176-PA	hypothetical protein|protein_coding|scf7180000645539:55852-74333:-1|gene:GMOY003176	118	41494	4	4	3	3	5264	1	1	1	724.375	1446.74	2	1446.74	0.0003	0	44.75	0.0002	R	ASSLEPLDELFAR	K				File43 Spectrum10365 scans: 15044	emPAI	0.26
35	1	GMOY002613-PA	hypothetical protein|protein_coding|scf7180000644097:25394-30911:-1|gene:GMOY002613	116	50591	3	3	1	1	7186	1	1	1	844.448	1686.88	2	1686.88	-0.0003	0	67.52	8.9e-07	R	AVFVDLEPTVVDEVR	T				File43 Spectrum9195 scans: 13648
35	1	GMOY002613-PA	hypothetical protein|protein_coding|scf7180000644097:25394-30911:-1|gene:GMOY002613	116	50591	3	3	1	1	7187	1	1	1	844.449	1686.88	2	1686.88	0.0016	0	62.71	2.5e-06	R	AVFVDLEPTVVDEVR	T				File43 Spectrum9117 scans: 13556
35	1	GMOY002613-PA	hypothetical protein|protein_coding|scf7180000644097:25394-30911:-1|gene:GMOY002613	116	50591	3	3	1	1	7188	1	1	1	563.303	1686.89	3	1686.88	0.0031	0	44.18	0.00018	R	AVFVDLEPTVVDEVR	T				File43 Spectrum9130 scans: 13570	emPAI	0.13
36	1	GMOY009531-PA	hypothetical protein|protein_coding|scf7180000651846:1752302-1755665:-1|gene:GMOY009531	109	56709	2	2	1	1	6117	1	1	1	776.922	1551.83	2	1551.83	-0.0004	0	65.35	1e-06	R	AALGTPYVYTVELR	D				File43 Spectrum7902 scans: 12134
36	1	GMOY009531-PA	hypothetical protein|protein_coding|scf7180000651846:1752302-1755665:-1|gene:GMOY009531	109	56709	2	2	1	1	6118	1	1	1	776.922	1551.83	2	1551.83	0	0	71.65	2.4e-07	R	AALGTPYVYTVELR	D				File43 Spectrum7972 scans: 12221	emPAI	0.06
37	1	GMOY000153-PA	hypothetical protein|protein_coding|scf7180000639097:81864-88062:-1|gene:GMOY000153	108	93636	4	4	2	2	4325	1	1	1	659.379	1316.74	2	1316.75	-0.0027	0	40.04	0.00034	R	FVQSVVELIQR	H				File43 Spectrum8335 scans: 12657
37	1	GMOY000153-PA	hypothetical protein|protein_coding|scf7180000639097:81864-88062:-1|gene:GMOY000153	108	93636	4	4	2	2	4326	1	1	1	659.379	1316.74	2	1316.75	-0.0024	0	42.52	0.00019	R	FVQSVVELIQR	H				File43 Spectrum8281 scans: 12581
37	1	GMOY000153-PA	hypothetical protein|protein_coding|scf7180000639097:81864-88062:-1|gene:GMOY000153	108	93636	4	4	2	2	4327	1	1	1	659.381	1316.75	2	1316.75	0.002	0	30.24	0.0024	R	FVQSVVELIQR	H				File43 Spectrum8459 scans: 12806
37	1	GMOY000153-PA	hypothetical protein|protein_coding|scf7180000639097:81864-88062:-1|gene:GMOY000153	108	93636	4	4	2	2	7248	1	1	1	848.414	1694.81	2	1694.82	-0.0019	0	78.81	5.7e-08	R	IIDPYLDLEDNYGR	G				File43 Spectrum8233 scans: 12524	emPAI	0.07
38	1	GMOY008040-PA	hypothetical protein|protein_coding|scf7180000650867:14263-14847:-1|gene:GMOY008040	107	22100	4	4	3	3	392	1	1	1	410.214	818.413	2	818.413	-0.0005	0	35.94	0.0022	R	SVDETLR	L				File43 Spectrum530 scans: 3445
38	1	GMOY008040-PA	hypothetical protein|protein_coding|scf7180000650867:14263-14847:-1|gene:GMOY008040	107	22100	4	4	3	3	3407	1	1	1	613.348	1224.68	2	1224.68	-0.0005	0	51.8	1.7e-05	R	QITINDLPVGR	S				File43 Spectrum6166 scans: 10110
38	1	GMOY008040-PA	hypothetical protein|protein_coding|scf7180000650867:14263-14847:-1|gene:GMOY008040	107	22100	4	4	3	3	3408	1	1	1	613.349	1224.68	2	1224.68	0.0016	0	44.91	7.4e-05	R	QITINDLPVGR	S				File43 Spectrum6241 scans: 10201
38	1	GMOY008040-PA	hypothetical protein|protein_coding|scf7180000650867:14263-14847:-1|gene:GMOY008040	107	22100	4	4	3	3	6488	1	1	1	812.404	1622.79	2	1622.79	0.0004	0	60.32	4.6e-06	R	EYGVLNEETGIPFR	G				File43 Spectrum7813 scans: 12028	emPAI	0.53
38		GMOY000509-PA	hypothetical protein|protein_coding|scf7180000639967:58864-64044:1|gene:GMOY000509	36	33022	1	1	1	1	392	1	0	1	410.214	818.413	2	818.413	-0.0005	0	35.94	0.0022	R	SVDETLR	L				File43 Spectrum530 scans: 3445
39	1	GMOY009587-PA	hypothetical protein|protein_coding|scf7180000651846:3027739-3029048:1|gene:GMOY009587	106	13436	7	7	2	2	4571	1	1	1	678.829	1355.64	2	1355.64	0.0004	0	47.36	6.4e-05	R	CPDSFLFLTEK	G				File43 Spectrum8952 scans: 13367
39	1	GMOY009587-PA	hypothetical protein|protein_coding|scf7180000651846:3027739-3029048:1|gene:GMOY009587	106	13436	7	7	2	2	13536	1	1	1	841.354	2521.04	3	2521.04	0.0005	0	32.56	0.00055	R	NFWDPTHYWECANAGGEPENK	R				File43 Spectrum15308 scans: 21875
39	1	GMOY009587-PA	hypothetical protein|protein_coding|scf7180000651846:3027739-3029048:1|gene:GMOY009587	106	13436	7	7	2	2	13537	1	1	1	841.354	2521.04	3	2521.04	0.0009	0	32.9	0.00051	R	NFWDPTHYWECANAGGEPENK	R				File43 Spectrum15366 scans: 21956
39	1	GMOY009587-PA	hypothetical protein|protein_coding|scf7180000651846:3027739-3029048:1|gene:GMOY009587	106	13436	7	7	2	2	13538	1	1	1	841.354	2521.04	3	2521.04	0.001	0	36.29	0.00023	R	NFWDPTHYWECANAGGEPENK	R				File43 Spectrum15162 scans: 21655
39	1	GMOY009587-PA	hypothetical protein|protein_coding|scf7180000651846:3027739-3029048:1|gene:GMOY009587	106	13436	7	7	2	2	13539	1	1	1	841.354	2521.04	3	2521.04	0.0016	0	31.06	0.00078	R	NFWDPTHYWECANAGGEPENK	R				File43 Spectrum14884 scans: 21234
39	1	GMOY009587-PA	hypothetical protein|protein_coding|scf7180000651846:3027739-3029048:1|gene:GMOY009587	106	13436	7	7	2	2	13542	1	1	1	841.356	2521.05	3	2521.04	0.006	0	37.23	0.00019	R	NFWDPTHYWECANAGGEPENK	R				File43 Spectrum15251 scans: 21790
39	1	GMOY009587-PA	hypothetical protein|protein_coding|scf7180000651846:3027739-3029048:1|gene:GMOY009587	106	13436	7	7	2	2	13544	1	1	1	841.358	2521.05	3	2521.04	0.0139	0	30.73	0.00085	R	NFWDPTHYWECANAGGEPENK	R				File43 Spectrum15424 scans: 22044	emPAI	0.57
40	1	GMOY006849-PA	hypothetical protein|protein_coding|scf7180000649373:19643-19996:-1|gene:GMOY006849	99	14139	9	9	1	1	14116	1	1	1	883.771	2648.29	3	2648.3	-0.0121	0	34.24	0.0011	R	AVHPDTFPGPNFEPTFDPLLGAPGR	K				File43 Spectrum13783 scans: 19608
40	1	GMOY006849-PA	hypothetical protein|protein_coding|scf7180000649373:19643-19996:-1|gene:GMOY006849	99	14139	9	9	1	1	14117	1	1	1	883.772	2648.29	3	2648.3	-0.009	0	31.01	0.0022	R	AVHPDTFPGPNFEPTFDPLLGAPGR	K				File43 Spectrum13655 scans: 19425
40	1	GMOY006849-PA	hypothetical protein|protein_coding|scf7180000649373:19643-19996:-1|gene:GMOY006849	99	14139	9	9	1	1	14119	1	1	1	883.773	2648.3	3	2648.3	-0.0046	0	30.59	0.0025	R	AVHPDTFPGPNFEPTFDPLLGAPGR	K				File43 Spectrum12996 scans: 18484
40	1	GMOY006849-PA	hypothetical protein|protein_coding|scf7180000649373:19643-19996:-1|gene:GMOY006849	99	14139	9	9	1	1	14122	1	1	1	883.775	2648.3	3	2648.3	-0.0004	0	37.65	0.00046	R	AVHPDTFPGPNFEPTFDPLLGAPGR	K				File43 Spectrum13734 scans: 19536
40	1	GMOY006849-PA	hypothetical protein|protein_coding|scf7180000649373:19643-19996:-1|gene:GMOY006849	99	14139	9	9	1	1	14123	1	1	1	883.775	2648.3	3	2648.3	-0.0002	0	31.77	0.0018	R	AVHPDTFPGPNFEPTFDPLLGAPGR	K				File43 Spectrum12783 scans: 18189
40	1	GMOY006849-PA	hypothetical protein|protein_coding|scf7180000649373:19643-19996:-1|gene:GMOY006849	99	14139	9	9	1	1	14126	1	1	1	883.775	2648.3	3	2648.3	0.0016	0	32.2	0.0016	R	AVHPDTFPGPNFEPTFDPLLGAPGR	K				File43 Spectrum13327 scans: 18952
40	1	GMOY006849-PA	hypothetical protein|protein_coding|scf7180000649373:19643-19996:-1|gene:GMOY006849	99	14139	9	9	1	1	14127	1	1	1	883.775	2648.3	3	2648.3	0.002	0	43.97	0.00011	R	AVHPDTFPGPNFEPTFDPLLGAPGR	K				File43 Spectrum13390 scans: 19043
40	1	GMOY006849-PA	hypothetical protein|protein_coding|scf7180000649373:19643-19996:-1|gene:GMOY006849	99	14139	9	9	1	1	14129	1	1	1	883.776	2648.31	3	2648.3	0.0034	0	36.76	0.0006	R	AVHPDTFPGPNFEPTFDPLLGAPGR	K				File43 Spectrum13267 scans: 18862
40	1	GMOY006849-PA	hypothetical protein|protein_coding|scf7180000649373:19643-19996:-1|gene:GMOY006849	99	14139	9	9	1	1	14132	1	1	1	883.777	2648.31	3	2648.3	0.0066	0	37.02	0.0006	R	AVHPDTFPGPNFEPTFDPLLGAPGR	K				File43 Spectrum12871 scans: 18311	emPAI	0.24
41	1	GMOY000406-PA	hypothetical protein|protein_coding|scf7180000639690:116094-116737:1|gene:GMOY000406	97	19050	3	3	2	2	3087	1	1	1	597.38	1192.74	2	1192.74	0.0013	0	43.17	4.8e-05	K	LISAPVSAPLLL	-				File43 Spectrum11432 scans: 16371
41	1	GMOY000406-PA	hypothetical protein|protein_coding|scf7180000639690:116094-116737:1|gene:GMOY000406	97	19050	3	3	2	2	13121	1	1	1	805.136	2412.39	3	2412.39	-0.0017	0	41.37	7.3e-05	R	LLSPGFAAPLAPAPLAAAPLSAVAAR	Y				File43 Spectrum11438 scans: 16379
41	1	GMOY000406-PA	hypothetical protein|protein_coding|scf7180000639690:116094-116737:1|gene:GMOY000406	97	19050	3	3	2	2	13122	1	1	1	805.137	2412.39	3	2412.39	-0.0002	0	58.93	1.3e-06	R	LLSPGFAAPLAPAPLAAAPLSAVAAR	Y				File43 Spectrum11370 scans: 16295	emPAI	0.38
42	1	GMOY011809-PA	hypothetical protein|protein_coding|scf180000652170:20458458-20459051|gene:GMOY011809	95	11621	3	3	2	2	2589	1	1	1	501.232	1129.63	2	1129.63	-0.0012	0	42.16	1.1e-05	K	AIAGRSACR	D				File43 Spectrum4532 scans: 6254	emPAI	0.18
43	1	GMOY011770-PA	hypothetical protein|protein_coding|scf7180000652170:18773763-18774713:1|gene:GMOY011770	95	27102	3	3	3	3	1356	1	1	1	501.795	1001.58	2	1001.58	-0.0001	0	32.59	0.0025	R	VVLADLGTSK	G				File43 Spectrum3981 scans: 7568
43	1	GMOY011770-PA	hypothetical protein|protein_coding|scf7180000652170:18773763-18774713:1|gene:GMOY011770	95	27102	3	3	3	3	3022	1	1	1	592.844	1183.67	2	1183.67	-0.0007	0	47.6	6e-05	K	AGVVGMTLPIAR	D				File43 Spectrum7427 scans: 11568
43	1	GMOY011770-PA	hypothetical protein|protein_coding|scf7180000652170:18773763-18774713:1|gene:GMOY011770	95	27102	3	3	3	3	4583	1	1	1	679.873	1357.73	2	1357.73	0.0005	0	71.41	2.5e-07	K	NAVSLVTGGASGLGR	A				File43 Spectrum5707 scans: 9574	emPAI	0.42
43		GMOY008251-PA	hypothetical protein|protein_coding|scf7180000651085:84853-97968:1|gene:GMOY008251	52	22051	2	2	2	2	1356	1	0	1	501.795	1001.58	2	1001.58	-0.0001	0	32.59	0.0025	R	VVLADLGTSK	G				File43 Spectrum3981 scans: 7568
43		GMOY008251-PA	hypothetical protein|protein_coding|scf7180000651085:84853-97968:1|gene:GMOY008251	52	22051	2	2	2	2	3022	1	0	1	592.844	1183.67	2	1183.67	-0.0007	0	47.6	6e-05	K	AGVVGMTLPIAR	D				File43 Spectrum7427 scans: 11568
44	1	GMOY000747-PA	hypothetical protein|protein_coding|scf7180000640387:14204-14952:1|gene:GMOY000747	95	22527	2	2	2	2	1757	1	1	1	526.255	1050.49	2	1050.49	0.0028	0	33.08	0.0021	R	GDFCIQVGR	N				File43 Spectrum4612 scans: 8298
44	1	GMOY000747-PA	hypothetical protein|protein_coding|scf7180000640387:14204-14952:1|gene:GMOY000747	95	22527	2	2	2	2	6957	1	1	1	836.422	1670.83	2	1670.83	0.0003	0	90.85	3.7e-09	R	MLGETNPADSLPGTIR	G				File43 Spectrum6266 scans: 10230	emPAI	0.32
45	1	GMOY009985-PA	hypothetical protein|protein_coding|scf7180000652007:172458-174909:1|gene:GMOY009985	95	25338	5	5	5	5	384	1	1	1	408.733	815.451	2	815.45	0.0007	0	35.1	0.0025	R	EIQTAVR	L				File43 Spectrum309 scans: 3116
45	1	GMOY009985-PA	hypothetical protein|protein_coding|scf7180000652007:172458-174909:1|gene:GMOY009985	95	25338	5	5	5	5	1014	1	1	1	477.305	952.596	2	952.596	0.0002	0	32.76	0.00053	R	LLLPGELAK	H				File43 Spectrum6508 scans: 10515
45	1	GMOY009985-PA	hypothetical protein|protein_coding|scf7180000652007:172458-174909:1|gene:GMOY009985	95	25338	5	5	5	5	1278	1	1	0	495.293	988.571	2	988.571	0.0007	0	48.05	6.1e-05	K	VFLENVIR	D				File43 Spectrum7037 scans: 11117
45	1	GMOY009985-PA	hypothetical protein|protein_coding|scf7180000652007:172458-174909:1|gene:GMOY009985	95	25338	5	5	5	5	3000	1	1	0	590.814	1179.61	2	1179.61	0.0005	0	53.17	2.6e-05	R	ISGLIYEETR	G				File43 Spectrum4655 scans: 8349
45	1	GMOY009985-PA	hypothetical protein|protein_coding|scf7180000652007:172458-174909:1|gene:GMOY009985	95	25338	5	5	5	5	5355	1	1	1	731.405	1460.8	2	1460.79	0.0014	1	34.5	0.0011	R	STITSREIQTAVR	L				File43 Spectrum2509 scans: 5850	emPAI	0.86
45	2	GMOY000268-PA	hypothetical protein|protein_coding|scf7180000639349:889-3203:-1|gene:GMOY000268	92	13449	3	3	3	3	1278	1	0	0	495.293	988.571	2	988.571	0.0007	0	48.05	6.1e-05	K	VFLENVIR	D				File43 Spectrum7037 scans: 11117
45	2	GMOY000268-PA	hypothetical protein|protein_coding|scf7180000639349:889-3203:-1|gene:GMOY000268	92	13449	3	3	3	3	3000	1	0	0	590.814	1179.61	2	1179.61	0.0005	0	53.17	2.6e-05	R	ISGLIYEETR	G				File43 Spectrum4655 scans: 8349
45	2	GMOY000268-PA	hypothetical protein|protein_coding|scf7180000639349:889-3203:-1|gene:GMOY000268	92	13449	3	3	3	3	4391	1	0	1	442.589	1324.75	3	1324.75	-0.0004	0	43.82	7.7e-05	R	DNIQGITKPAIR	R				File43 Spectrum2783 scans: 6180	emPAI	0.97
45		GMOY000629-PA	hypothetical protein|protein_coding|scf7180000640213:7787-8152:1|gene:GMOY000629	48	13583	3	3	3	3	384	1	0	1	408.733	815.451	2	815.45	0.0007	0	35.1	0.0025	R	EIQTAVR	L				File43 Spectrum309 scans: 3116
45		GMOY000629-PA	hypothetical protein|protein_coding|scf7180000640213:7787-8152:1|gene:GMOY000629	48	13583	3	3	3	3	1014	1	0	1	477.305	952.596	2	952.596	0.0002	0	32.76	0.00053	R	LLLPGELAK	H				File43 Spectrum6508 scans: 10515
45		GMOY000629-PA	hypothetical protein|protein_coding|scf7180000640213:7787-8152:1|gene:GMOY000629	48	13583	3	3	3	3	5355	1	0	1	731.405	1460.8	2	1460.79	0.0014	1	34.5	0.0011	R	STITSREIQTAVR	L				File43 Spectrum2509 scans: 5850
46	1	GMOY007523-PA	hypothetical protein|protein_coding|scf7180000650446:20021-25319:1|gene:GMOY007523	95	169063	2	2	2	2	4693	1	1	1	684.843	1367.67	2	1367.67	0.0003	0	66.74	8.7e-07	R	LTPVDSAAYEFR	R				File43 Spectrum5898 scans: 9800
46	1	GMOY007523-PA	hypothetical protein|protein_coding|scf7180000650446:20021-25319:1|gene:GMOY007523	95	169063	2	2	2	2	6388	1	1	1	804.878	1607.74	2	1607.74	0.0015	0	56.36	7.9e-06	R	TVGQDLGQSGSCMLR	F				File43 Spectrum4284 scans: 7915	emPAI	0.04
47	1	GMOY006959-PA	hypothetical protein|protein_coding|scf7180000649701:32722-38010:1|gene:GMOY006959	92	62888	3	3	2	2	1507	1	1	1	513.748	1025.48	2	1025.48	0.0003	0	43.26	0.00015	R	FLTDDPYR	V				File43 Spectrum3808 scans: 7373
47	1	GMOY006959-PA	hypothetical protein|protein_coding|scf7180000649701:32722-38010:1|gene:GMOY006959	92	62888	3	3	2	2	4929	1	1	1	698.884	1395.75	2	1395.75	0.0019	0	48.92	5.3e-05	R	GIPYAQPPIGDLR	F				File43 Spectrum6810 scans: 10860
47	1	GMOY006959-PA	hypothetical protein|protein_coding|scf7180000649701:32722-38010:1|gene:GMOY006959	92	62888	3	3	2	2	4930	1	1	1	698.888	1395.76	2	1395.75	0.0094	0	55.66	1.1e-05	R	GIPYAQPPIGDLR	F				File43 Spectrum6722 scans: 10758	emPAI	0.11
48	1	GMOY010107-PA	hypothetical protein|protein_coding|scf7180000652064:120228-121390:-1|gene:GMOY010107	88	14906	1	1	1	1	5083	1	1	1	708.386	1414.76	2	1414.76	0.0006	0	87.99	6.6e-09	R	VIAPYNQAVVADR	T				File43 Spectrum3885 scans: 7461	emPAI	0.23
49	1	GMOY003306-PA	hypothetical protein|protein_coding|scf7180000645808:6973-8060:1|gene:GMOY003306	83	35490	6	6	2	2	23	1	1	1	353.716	705.417	2	705.417	-0.0009	0	30.44	0.0023	R	SFALLR	S				File43 Spectrum5686 scans: 9549
49	1	GMOY003306-PA	hypothetical protein|protein_coding|scf7180000645808:6973-8060:1|gene:GMOY003306	83	35490	6	6	2	2	25	1	1	1	353.716	705.417	2	705.417	-0.0005	0	35.73	0.00059	R	SFALLR	S				File43 Spectrum5597 scans: 9446
49	1	GMOY003306-PA	hypothetical protein|protein_coding|scf7180000645808:6973-8060:1|gene:GMOY003306	83	35490	6	6	2	2	10546	1	1	1	666.675	1997	3	1997	-0.0022	1	30.45	0.0037	R	AGTNTVQCYDKYVPLIR	Q				File43 Spectrum8048 scans: 12312
49	1	GMOY003306-PA	hypothetical protein|protein_coding|scf7180000645808:6973-8060:1|gene:GMOY003306	83	35490	6	6	2	2	10549	1	1	1	666.675	1997	3	1997	-0.0004	1	32.13	0.0025	R	AGTNTVQCYDKYVPLIR	Q				File43 Spectrum7969 scans: 12216
49	1	GMOY003306-PA	hypothetical protein|protein_coding|scf7180000645808:6973-8060:1|gene:GMOY003306	83	35490	6	6	2	2	10551	1	1	1	666.676	1997	3	1997	0.0007	1	47.7	7e-05	R	AGTNTVQCYDKYVPLIR	Q				File43 Spectrum7809 scans: 12024
49	1	GMOY003306-PA	hypothetical protein|protein_coding|scf7180000645808:6973-8060:1|gene:GMOY003306	83	35490	6	6	2	2	10552	1	1	1	666.676	1997.01	3	1997	0.0028	1	47.8	6.6e-05	R	AGTNTVQCYDKYVPLIR	Q				File43 Spectrum7733 scans: 11933	emPAI	0.2
50	1	GMOY000023-PA	hypothetical protein|protein_coding|scf7180000638894:91900-92229:-1|gene:GMOY000023	83	9284	1	1	1	1	9038	1	1	1	923.953	1845.89	2	1845.89	-0.0008	1	82.93	2e-08	R	LPITADEMEYINRGGPA	-				File43 Spectrum7543 scans: 11707	emPAI	0.37
51	1	GMOY002770-PA	hypothetical protein|protein_coding|scf7180000644388:50288-59191:-1|gene:GMOY002770	83	264160	2	2	2	2	1108	1	1	1	485.295	968.574	2	968.577	-0.0022	0	44.03	9.7e-05	R	VAVVNQLAR	Q				File43 Spectrum2716 scans: 6101
51	1	GMOY002770-PA	hypothetical protein|protein_coding|scf7180000644388:50288-59191:-1|gene:GMOY002770	83	264160	2	2	2	2	5999	1	1	1	767.402	1532.79	2	1532.78	0.0051	0	66.16	1.1e-06	R	VQQLEDAYAELVR	L				File43 Spectrum7761 scans: 11967	emPAI	0.02
52	1	GMOY011989-PA	hypothetical protein|protein_coding|scf7180000649844:126215-131214:-1|gene:GMOY011989	82	46490	3	3	3	3	940	1	1	1	468.743	935.471	2	935.471	-0.0006	0	32.73	0.0026	R	GITFEDVR	V				File43 Spectrum4438 scans: 8095
52	1	GMOY011989-PA	hypothetical protein|protein_coding|scf7180000649844:126215-131214:-1|gene:GMOY011989	82	46490	3	3	3	3	2799	1	1	1	579.799	1157.58	2	1157.58	0.0003	0	45.91	0.00014	R	LAAWEIDQGR	R				File43 Spectrum4837 scans: 8569
52	1	GMOY011989-PA	hypothetical protein|protein_coding|scf7180000649844:126215-131214:-1|gene:GMOY011989	82	46490	3	3	3	3	6334	1	1	1	799.912	1597.81	2	1597.81	-0.0006	0	62.07	2.9e-06	K	IYQIYEGTSQIQR	L				File43 Spectrum4724 scans: 8436	emPAI	0.23
53	1	GMOY009757-PA	hypothetical protein|protein_coding|scf7180000651876:19259-21588:1|gene:GMOY009757	79	30818	2	2	2	2	3718	1	1	1	631.295	1260.58	2	1260.57	0.0021	1	57.4	3.9e-06	R	DWIRENSDLN	-				File43 Spectrum4606 scans: 8292
53	1	GMOY009757-PA	hypothetical protein|protein_coding|scf7180000651876:19259-21588:1|gene:GMOY009757	79	30818	2	2	2	2	12152	1	1	1	753.032	2256.07	3	2256.07	0.0038	0	48.17	5e-05	R	SEILQYTTLSSLTNQECNR	L				File43 Spectrum8127 scans: 12404	emPAI	0.23
54	1	GMOY006034-PB	hypothetical protein|protein_coding|scf7180000648818:64963-72628:-1|gene:GMOY006034	77	34785	2	2	1	1	613	1	1	1	437.731	873.447	2	873.449	-0.0018	0	52.97	4e-05	R	GNMANVIR	Y				File43 Spectrum1964 scans: 5192
54	1	GMOY006034-PB	hypothetical protein|protein_coding|scf7180000648818:64963-72628:-1|gene:GMOY006034	77	34785	2	2	1	1	614	1	1	1	437.732	873.449	2	873.449	0.0004	0	56.19	2e-05	R	GNMANVIR	Y				File43 Spectrum1879 scans: 5094	emPAI	0.1
55	1	GMOY005492-PA	hypothetical protein|protein_coding|scf7180000648617:82963-83852:-1|gene:GMOY005492	77	30306	2	2	2	2	4429	1	1	1	667.341	1332.67	2	1332.67	0.0003	0	65.17	1.4e-06	K	AFGEAGDGLVELR	R				File43 Spectrum6725 scans: 10761
55	1	GMOY005492-PA	hypothetical protein|protein_coding|scf7180000648617:82963-83852:-1|gene:GMOY005492	77	30306	2	2	2	2	11854	1	1	1	1085.58	2169.15	2	2169.14	0.0024	0	39.62	0.00031	R	GVAYLPGNQNTLLNLPSSLAQ	-				File43 Spectrum10852 scans: 15648	emPAI	0.23
56	1	GMOY006839-PA	hypothetical protein|protein_coding|scf7180000649348:12551-19113:-1|gene:GMOY006839	77	30406	2	2	1	1	2689	1	1	1	572.786	1143.56	2	1143.56	0.0018	0	60.65	3.5e-06	R	DWILENAGNL	-				File43 Spectrum10299 scans: 14963
56	1	GMOY006839-PA	hypothetical protein|protein_coding|scf7180000649348:12551-19113:-1|gene:GMOY006839	77	30406	2	2	1	1	2690	1	1	1	572.787	1143.56	2	1143.56	0.0024	0	45.12	0.00012	R	DWILENAGNL	-				File43 Spectrum10228 scans: 14877	emPAI	0.11
57	1	GMOY003216-PA	hypothetical protein|protein_coding|scf7180000645625:136161-138241:1|gene:GMOY003216	77	72671	1	1	1	1	5950	1	1	1	763.878	1525.74	2	1525.74	0.0003	0	76.59	1e-07	R	ITPSYVAFTADGER	L				File43 Spectrum5799 scans: 9682	emPAI	0.05
58	1	GMOY007699-PA	hypothetical protein|protein_coding|scf7180000650612:302298-303685:1|gene:GMOY007699	74	33369	1	1	1	1	5117	1	1	1	712.34	1422.67	2	1422.66	0.0031	0	74.12	1.9e-07	R	ELAEDGYSGVEVR	V				File43 Spectrum3590 scans: 7120	emPAI	0.1
59	1	GMOY012011-PA	hypothetical protein|protein_coding|scf7180000649808:31083-33780:1|gene:GMOY012011	74	104685	2	2	2	2	2383	1	1	1	557.78	1113.54	2	1113.55	-0.0006	0	51.42	2.1e-05	R	GENYLYTVR	Q				File43 Spectrum4136 scans: 7747
59	1	GMOY012011-PA	hypothetical protein|protein_coding|scf7180000649808:31083-33780:1|gene:GMOY012011	74	104685	2	2	2	2	5564	1	1	1	743.844	1485.67	2	1485.67	-0.0006	0	49.48	3.1e-05	R	NSQDFYLTIDDR	T				File43 Spectrum6506 scans: 10512	emPAI	0.06
60	1	GMOY011766-PA	hypothetical protein|protein_coding|scf7180000652170:18700671-18701682:-1|gene:GMOY011766	70	28524	2	2	1	1	1627	1	1	1	519.837	1037.66	2	1037.66	-0.0007	0	51.73	6.7e-06	R	LITPVVLQR	K				File43 Spectrum5958 scans: 9867
60	1	GMOY011766-PA	hypothetical protein|protein_coding|scf7180000652170:18700671-18701682:-1|gene:GMOY011766	70	28524	2	2	1	1	1628	1	1	1	519.837	1037.66	2	1037.66	-0.0006	0	41	7.9e-05	R	LITPVVLQR	K				File43 Spectrum6042 scans: 9965	emPAI	0.12
61	1	GMOY009366-PA	hypothetical protein|protein_coding|scf7180000651840:1448561-1466944:1|gene:GMOY009366	70	232686	1	1	1	1	2987	1	1	1	590.295	1178.58	2	1178.58	0.0004	0	69.61	6.1e-07	R	VGGAEFEALMR	M				File43 Spectrum7228 scans: 11339	emPAI	0.01
61	1	GMOY004384-PA	hypothetical protein|protein_coding|scf7180000648078:157375-167838:-1|gene:GMOY004384	68	168610	1	1	1	1	604	1	1	1	436.781	871.548	2	871.549	-0.0011	0	67.58	3.2e-07	R	LGITSLIR	E				File43 Spectrum7375 scans: 11508	emPAI	0.02
62	1	GMOY001361-PA	hypothetical protein|protein_coding|scf7180000641295:26523-27978:1|gene:GMOY001361	67	27129	2	2	1	1	7093	1	1	1	838.933	1675.85	2	1675.85	-0.0013	0	37.57	0.00089	R	IADVVYNASNNELVR	T				File43 Spectrum5405 scans: 9226
63	1	GMOY001361-PA	hypothetical protein|protein_coding|scf7180000641295:26523-27978:1|gene:GMOY001361	67	27129	2	2	1	1	7094	1	1	1	559.625	1675.85	3	1675.85	-0.0012	0	55.86	1.3e-05	R	IADVVYNASNNELVR	T				File43 Spectrum5417 scans: 9240	emPAI	0.26
64	1	GMOY001291-PA	hypothetical protein|protein_coding|scf7180000641229:21407-23269:-1|gene:GMOY001291	67	64747	1	1	1	1	4958	1	1	1	700.844	1399.67	2	1399.67	0.0006	0	67.04	8.8e-07	R	YNTSVDQAALYR	L				File43 Spectrum3618 scans: 7152	emPAI	0.05
65	1	GMOY010752-PA	hypothetical protein|protein_coding|scf7180000652156:1013793-1014372:1|gene:GMOY010752	66	18646	1	1	1	1	4303	1	1	1	658.312	1314.61	2	1314.61	-0.0001	0	66.06	6.7e-07	R	LFDEEGYSSLR	K				File43 Spectrum5433 scans: 9260	emPAI	0.18
66	1	GMOY000765-PA	hypothetical protein|protein_coding|scf7180000640407:42784-45946:-1|gene:GMOY000765	66	56204	1	1	1	1	8794	1	1	1	915.459	1828.9	2	1828.91	-0.0036	0	65.95	9.5e-07	R	EIEIAEQEMPGIMALR	K				File43 Spectrum9593 scans: 14123	emPAI	0.06
67	1	GMOY010142-PA	hypothetical protein|protein_coding|scf7180000652074:7344-8388:-1|gene:GMOY010142	65	34372	1	1	1	1	6866	1	1	1	828.889	1655.76	2	1655.76	-0.0012	0	65.04	1.1e-06	R	VYGDGVVIDSVMCAR	G	Oxidation (M)	0.000000000001000.0		File43 Spectrum5442 scans: 9270	emPAI	0.1
67	1	GMOY011932-PA	hypothetical protein|protein_coding|scf7180000652170:24097376-24104331:1|gene:GMOY011932	65	100550	2	2	1	1	5625	1	1	1	746.899	1491.78	2	1491.79	-0.0024	0	40.87	0.0004	R	LVGPNCPGIIAPER	C				File43 Spectrum4821 scans: 8549
68	1	GMOY011932-PA	hypothetical protein|protein_coding|scf7180000652170:24097376-24104331:1|gene:GMOY011932	65	100550	2	2	1	1	5626	1	1	1	746.901	1491.79	2	1491.79	0.0004	0	52.64	2.6e-05	R	LVGPNCPGIIAPER	C				File43 Spectrum4903 scans: 8645	emPAI	0.03
69	1	GMOY003645-PA	hypothetical protein|protein_coding|scf7180000646822:70642-76063:1|gene:GMOY003645	64	24333	1	1	1	1	3510	1	1	1	619.786	1237.56	2	1237.56	0.0002	0	64.37	1.2e-06	R	DSAEDYVNIGR	S				File43 Spectrum4090 scans: 7693	emPAI	0.14
70	1	GMOY007917-PA	hypothetical protein|protein_coding|scf7180000650729:3995-15239:-1|gene:GMOY007917	63	68272	1	1	1	1	2955	1	1	1	587.793	1173.57	2	1173.57	0.0018	0	63.33	2.9e-06	R	MTADELLPER	G				File43 Spectrum5368 scans: 9183	emPAI	0.05
70	1	GMOY002604-PA	hypothetical protein|protein_coding|scf7180000644077:58952-59743:1|gene:GMOY002604	62	24366	2	2	2	2	1345	1	1	1	501.739	1001.46	2	1001.46	0.0001	0	42.18	0.00011	R	YMQELYR	K				File43 Spectrum3017 scans: 6458
71	1	GMOY002604-PA	hypothetical protein|protein_coding|scf7180000644077:58952-59743:1|gene:GMOY002604	62	24366	2	2	2	2	1346	1	1	1	501.765	1001.52	2	1001.51	0.001	0	47.27	7.7e-05	R	GLQSIAEER	V				File43 Spectrum2411 scans: 5726	emPAI	0.29
72	1	GMOY009685-PA	hypothetical protein|protein_coding|scf7180000651846:5726876-5735124:-1|gene:GMOY009685	62	106926	1	1	1	1	3468	1	1	1	617.311	1232.61	2	1232.61	0	0	61.97	3.7e-06	R	MSDEIQEIIR	V				File43 Spectrum6443 scans: 10437	emPAI	0.03
72	1	GMOY009145-PA	hypothetical protein|protein_coding|scf7180000651771:1955628-1968415:1|gene:GMOY009145	62	37451	2	2	2	2	26	1	1	1	353.716	705.417	2	705.417	-0.0005	0	42.99	0.00011	R	AIIFSR	I				File43 Spectrum3333 scans: 6820
73	1	GMOY009145-PA	hypothetical protein|protein_coding|scf7180000651771:1955628-1968415:1|gene:GMOY009145	62	37451	2	2	2	2	571	1	1	1	434.24	866.465	2	866.465	0.0001	0	45.74	0.0001	R	AVFFVER	A				File43 Spectrum5453 scans: 9284	emPAI	0.18
74	1	GMOY006173-PA	hypothetical protein|protein_coding|scf7180000648874:157338-167023:1|gene:GMOY006173	62	28310	1	1	1	1	2874	1	1	1	583.295	1164.58	2	1164.58	-0.0015	0	61.69	3.2e-06	R	YLAEVATGDAR	N				File43 Spectrum2444 scans: 5768	emPAI	0.12
74	1	GMOY003494-PA	hypothetical protein|protein_coding|scf7180000646258:462494-470360:-1|gene:GMOY003494	60	107459	3	3	1	1	1333	1	1	1	500.784	999.553	2	999.553	-0.0004	0	34.09	0.0022	R	IGQPIMSVR	S				File43 Spectrum3673 scans: 7216
74	1	GMOY003494-PA	hypothetical protein|protein_coding|scf7180000646258:462494-470360:-1|gene:GMOY003494	60	107459	3	3	1	1	1334	1	1	1	500.784	999.553	2	999.553	-0.0002	0	40.5	0.00049	R	IGQPIMSVR	S				File43 Spectrum3581 scans: 7110
75	1	GMOY003494-PA	hypothetical protein|protein_coding|scf7180000646258:462494-470360:-1|gene:GMOY003494	60	107459	3	3	1	1	1449	1	1	1	508.781	1015.55	2	1015.55	-0.0017	0	45.07	0.00024	R	IGQPIMSVR	S	Oxidation (M)	0.000001000.0		File43 Spectrum1719 scans: 4907	emPAI	0.06
75	1	GMOY001303-PA	hypothetical protein|protein_coding|scf7180000641233:10114-13239:1|gene:GMOY001303	60	45149	2	2	2	2	2336	1	1	1	553.838	1105.66	2	1105.66	0.001	0	38.01	0.00016	R	AAPLVAAAPAVR	A				File43 Spectrum3738 scans: 7290
76	1	GMOY001303-PA	hypothetical protein|protein_coding|scf7180000641233:10114-13239:1|gene:GMOY001303	60	45149	2	2	2	2	2631	1	1	1	568.843	1135.67	2	1135.67	-0.0005	0	45.31	4.3e-05	R	AAPLVAATPAVR	A				File43 Spectrum3525 scans: 7045	emPAI	0.15
77	1	GMOY012268-PA	hypothetical protein|protein_coding|scf7180000648754:47965-48285:-1|gene:GMOY012268	59	10522	1	1	1	1	1311	1	1	1	499.785	997.556	2	997.556	0.0003	0	58.7	3.1e-06	K	ITDAVNPLR	M				File43 Spectrum3160 scans: 6621	emPAI	0.33
78	1	GMOY001589-PA	hypothetical protein|protein_coding|scf7180000641554:79886-85019:1|gene:GMOY001589	58	60838	1	1	1	1	9226	1	1	1	935.496	1868.98	2	1868.97	0.0037	0	58.25	5.4e-06	K	FGQPEIALGTIPGAGGTQR	L				File43 Spectrum7415 scans: 11554	emPAI	0.05
79	1	GMOY008462-PA	hypothetical protein|protein_coding|scf7180000651334:67430-72242:1|gene:GMOY008462	58	75401	1	1	1	1	4020	1	1	1	646.841	1291.67	2	1291.67	-0.0033	0	57.67	8.1e-06	R	IMSVNQFIANR	S				File43 Spectrum7169 scans: 11271	emPAI	0.04
80	1	GMOY000672-PA	hypothetical protein|protein_coding|scf7180000640286:76772-77693:1|gene:GMOY000672	57	31053	1	1	1	1	5998	1	1	1	767.396	1532.78	2	1532.77	0.0031	0	57.47	7.7e-06	R	NANPGQFPYAVSLR	Y				File43 Spectrum6887 scans: 10947	emPAI	0.11
80	1	GMOY002973-PA	hypothetical protein|protein_coding|scf7180000644950:57621-77206:-1|gene:GMOY002973	57	233372	2	1	2	1	711	1	1	1	446.241	890.468	2	890.468	-0.0004	0	30.01	0.0081	R	FLQQMPK	G				File43 Spectrum2734 scans: 6123
81	1	GMOY002973-PA	hypothetical protein|protein_coding|scf7180000644950:57621-77206:-1|gene:GMOY002973	57	233372	2	1	2	1	4010	1	1	1	645.822	1289.63	2	1289.63	0.0002	0	56.94	1.3e-05	R	SELLQMEDGLR	L				File43 Spectrum6549 scans: 10561	emPAI	0.01
82	1	GMOY008464-PA	hypothetical protein|protein_coding|scf7180000651334:88023-94383:1|gene:GMOY008464	57	40209	1	1	1	1	1567	1	1	1	515.798	1029.58	2	1029.58	0.0003	0	56.85	1e-05	R	LIVENLSSR	V				File43 Spectrum3761 scans: 7317	emPAI	0.08
83	1	GMOY007620-PA	hypothetical protein|protein_coding|scf7180000650553:408823-410766:1|gene:GMOY007620	56	52927	1	1	1	1	4898	1	1	1	697.353	1392.69	2	1392.69	-0.0003	0	56.34	1.1e-05	R	LGEQAVFEEFPK	A				File43 Spectrum7449 scans: 11593	emPAI	0.06
84	1	GMOY000340-PA	hypothetical protein|protein_coding|scf7180000639576:24426-25057:1|gene:GMOY000340	56	11263	1	1	1	1	4769	1	1	1	687.355	1372.7	2	1372.7	0.0007	0	55.91	1.6e-05	K	MMQGTVVAVGPGAR	N				File43 Spectrum3819 scans: 7385	emPAI	0.31
85	1	GMOY009131-PA	hypothetical protein|protein_coding|scf7180000651771:910771-955907:-1|gene:GMOY009131	56	47220	1	1	1	1	705	1	1	1	443.771	885.528	2	885.528	-0.0002	0	55.53	1.5e-05	R	VLIDAVTR	T				File43 Spectrum3646 scans: 7184	emPAI	0.07
86	1	GMOY004070-PA	hypothetical protein|protein_coding|scf7180000647940:20449-21524:-1|gene:GMOY004070	55	19496	1	1	1	1	3388	1	1	1	611.862	1221.71	2	1221.71	0.0008	0	55.23	5.1e-06	R	VLVDGPLTGVPR	Q				File43 Spectrum6085 scans: 10018	emPAI	0.17
87	1	GMOY006808-PA	hypothetical protein|protein_coding|scf7180000649336:10072-13836:1|gene:GMOY006808	55	135974	1	1	1	1	3071	1	1	1	596.323	1190.63	2	1190.63	0.0028	0	54.81	1.9e-05	R	ALDTLQEVFR	T				File43 Spectrum8046 scans: 12309	emPAI	0.02
87	1	GMOY004149-PA	hypothetical protein|protein_coding|scf7180000647982:3201-19384:1|gene:GMOY004149	55	57390	2	2	2	2	5904	1	1	1	761.872	1521.73	2	1521.73	-0.001	0	43.42	0.00016	R	AEALTATDPDYSIR	D				File43 Spectrum4363 scans: 8006
88	1	GMOY004149-PA	hypothetical protein|protein_coding|scf7180000647982:3201-19384:1|gene:GMOY004149	55	57390	2	2	2	2	8550	1	1	1	902.463	1802.91	2	1802.91	-0.002	0	39.85	0.00041	R	LGPNYLQIPVNCPYR	V				File43 Spectrum8024 scans: 12283	emPAI	0.12
89	1	GMOY000473-PA	hypothetical protein|protein_coding|scf7180000639890:185361-186362:-1|gene:GMOY000473	54	35868	1	1	1	1	5676	1	1	1	748.429	1494.84	2	1494.84	0.0022	0	54.4	5.4e-06	R	VPTPNVSVVDLTVR	L				File43 Spectrum7562 scans: 11730	emPAI	0.09
90	1	GMOY000656-PA	hypothetical protein|protein_coding|scf7180000640257:51-1517:1|gene:GMOY000656	54	56225	1	1	1	1	5308	1	1	1	727.919	1453.82	2	1453.83	-0.0009	0	53.87	6.8e-06	R	VVVIGSGPSGIAAATR	L				File43 Spectrum5204 scans: 8992	emPAI	0.06
90	1	GMOY003710-PA	hypothetical protein|protein_coding|scf7180000646966:80949-89157:-1|gene:GMOY003710	54	87313	2	1	1	1	1256	1	1	1	494.274	986.533	2	986.533	-0.0003	0	53.64	3.7e-05	R	AMVGIVAGGGR	I				File43 Spectrum3072 scans: 6520
91	1	GMOY003710-PA	hypothetical protein|protein_coding|scf7180000646966:80949-89157:-1|gene:GMOY003710	54	87313	2	1	1	1	1258	1	1	1	494.275	986.535	2	986.533	0.0024	0	31.57	0.0062	R	AMVGIVAGGGR	I				File43 Spectrum3113 scans: 6567	emPAI	0.04
92	1	GMOY008845-PA	hypothetical protein|protein_coding|scf7180000651618:25120-25870:1|gene:GMOY008845	54	25361	1	1	1	1	3365	1	1	1	610.302	1218.59	2	1218.59	0.0015	0	53.66	2.2e-05	R	SLEVDWLDSR	N				File43 Spectrum7869 scans: 12093	emPAI	0.13
93	1	GMOY002199-PA	hypothetical protein|protein_coding|scf7180000642974:49446-50837:1|gene:GMOY002199	53	50714	1	1	1	1	1506	1	1	1	513.308	1024.6	2	1024.6	-0.0014	0	53.46	1e-05	K	IGGIGTVPVGR	V				File43 Spectrum3867 scans: 7440	emPAI	0.06
93	1	GMOY009357-PA	hypothetical protein|protein_coding|scf7180000651840:1319933-1321145:1|gene:GMOY009357	53	37973	2	2	2	2	1284	1	1	1	495.755	989.496	2	989.496	0	0	34.68	0.0019	R	MTIVGAENR	K				File43 Spectrum1906 scans: 5125
94	1	GMOY009357-PA	hypothetical protein|protein_coding|scf7180000651840:1319933-1321145:1|gene:GMOY009357	53	37973	2	2	2	2	5440	1	1	1	737.427	1472.84	2	1472.84	0.0046	0	42.66	7.9e-05	R	LGANSLLDLVVFGR	A				File43 Spectrum15624 scans: 22344	emPAI	0.18
94	1	GMOY011691-PA	hypothetical protein|protein_coding|scf7180000652170:13209700-13214085:-1|gene:GMOY011691	53	84984	3	3	3	3	77	1	1	1	366.206	730.397	2	730.397	-0.0006	0	33.36	0.005	R	TNEVLR	I				File43 Spectrum182 scans: 2869
94	1	GMOY011691-PA	hypothetical protein|protein_coding|scf7180000652170:13209700-13214085:-1|gene:GMOY011691	53	84984	3	3	3	3	1866	1	1	1	531.782	1061.55	2	1061.55	-0.0006	0	36.51	0.0017	R	YEAPLVNTR	L				File43 Spectrum2756 scans: 6148
95	1	GMOY011691-PA	hypothetical protein|protein_coding|scf7180000652170:13209700-13214085:-1|gene:GMOY011691	53	84984	3	3	3	3	3352	1	1	1	609.777	1217.54	2	1217.54	0.001	0	38.89	0.00022	R	DYFMTDAISR	S				File43 Spectrum6457 scans: 10453	emPAI	0.12
96	1	GMOY007520-PA	hypothetical protein|protein_coding|scf7180000650443:93189-94229:1|gene:GMOY007520	52	21488	1	1	1	1	5688	1	1	1	749.892	1497.77	2	1497.77	0.0025	0	52.27	2.8e-05	R	DLPGALDETGLIER	M				File43 Spectrum7849 scans: 12070	emPAI	0.16
96	1	GMOY005309-PA	hypothetical protein|protein_coding|scf7180000648528:54738-56638:-1|gene:GMOY005309	52	53087	2	2	2	2	68	1	1	1	365.216	728.418	2	728.418	-0.0005	0	38.6	0.0008	R	LEGGVVR	Q				File43 Spectrum410 scans: 3277
97	1	GMOY005309-PA	hypothetical protein|protein_coding|scf7180000648528:54738-56638:-1|gene:GMOY005309	52	53087	2	2	2	2	4449	1	1	1	669.346	1336.68	2	1336.68	-0.0001	0	42.56	0.00023	K	EGQFPYQISLR	H				File43 Spectrum7412 scans: 11551	emPAI	0.13
98	1	GMOY012049-PA	hypothetical protein|protein_coding|scf7180000652155:208901-210859:1|gene:GMOY012049	51	71621	1	1	1	1	5725	1	1	1	751.363	1500.71	2	1500.71	0.0024	0	51.02	3e-05	R	TTPSYVAFTETER	L				File43 Spectrum5101 scans: 8872	emPAI	0.05
99	1	GMOY001611-PA	hypothetical protein|protein_coding|scf7180000641630:45230-46955:-1|gene:GMOY001611	50	60638	1	1	1	1	2473	1	1	1	562.285	1122.56	2	1122.56	0.0007	0	50	6.7e-05	R	IYDSEDLLR	G				File43 Spectrum5185 scans: 8970	emPAI	0.05
100	1	GMOY003765-PA	hypothetical protein|protein_coding|scf7180000647120:50875-64853:1|gene:GMOY003765	50	70470	1	1	1	1	3324	1	1	1	609.315	1216.62	2	1216.61	0.0033	0	49.56	7e-05	R	DLMEAQEIIR	R				File43 Spectrum6645 scans: 10671	emPAI	0.05
100	1	GMOY005519-PA	hypothetical protein|protein_coding|scf7180000648628:20365-26049:1|gene:GMOY005519	49	49205	2	2	2	2	708	1	1	1	445.711	889.407	2	889.408	-0.0018	0	47.92	6.3e-05	R	FGNYAYR	S				File43 Spectrum2111 scans: 5363
101	1	GMOY005519-PA	hypothetical protein|protein_coding|scf7180000648628:20365-26049:1|gene:GMOY005519	49	49205	2	2	2	2	2008	1	1	1	538.299	1074.58	2	1074.58	0.0009	0	30.23	0.0054	K	INVGIPSYGR	A				File43 Spectrum5025 scans: 8784	emPAI	0.14
101	1	GMOY003659-PA	hypothetical protein|protein_coding|scf7180000646825:64347-75677:-1|gene:GMOY003659	49	36375	2	2	2	2	1516	1	1	1	514.288	1026.56	2	1026.56	0.0004	0	35.72	0.00099	R	SIQPWLQR	K				File43 Spectrum4999 scans: 8755
102	1	GMOY003659-PA	hypothetical protein|protein_coding|scf7180000646825:64347-75677:-1|gene:GMOY003659	49	36375	2	2	2	2	8543	1	1	1	902.406	1802.8	2	1802.79	0.0034	0	40.41	0.00018	R	DLVPDMNNFYEQYR	S				File43 Spectrum8972 scans: 13389	emPAI	0.19
103	1	GMOY001824-PA	hypothetical protein|protein_coding|scf7180000642166:1406-3204:1|gene:GMOY001824	49	54314	1	1	1	1	1188	1	1	1	492.269	982.524	2	982.524	-0.0001	0	48.98	4.2e-05	R	IFTNLYGR	H				File43 Spectrum4886 scans: 8626	emPAI	0.06
104	1	GMOY004591-PA	hypothetical protein|protein_coding|scf7180000648156:3133-6815:-1|gene:GMOY004591	49	50671	1	1	1	1	1085	1	1	1	481.775	961.535	2	961.534	0.0001	0	48.76	5.5e-05	R	LAAAFNVTR	Q				File43 Spectrum3737 scans: 7289	emPAI	0.07
105	1	GMOY010357-PA	hypothetical protein|protein_coding|scf7180000652136:116209-117703:1|gene:GMOY010357	48	41119	1	1	1	1	2419	1	1	1	559.314	1116.61	2	1116.61	0.0003	0	48.28	8.1e-05	R	SIDLSTQVVR	E				File43 Spectrum4372 scans: 8017	emPAI	0.08
106	1	GMOY007443-PA	hypothetical protein|protein_coding|scf7180000650392:22142-24500:1|gene:GMOY007443	48	63246	1	1	1	1	4090	1	1	1	649.313	1296.61	2	1296.61	0.0013	0	47.68	6.1e-05	K	VFNNIDQEYR	S				File43 Spectrum3613 scans: 7146	emPAI	0.05
107	1	GMOY007820-PA	hypothetical protein|protein_coding|scf7180000650671:1524166-1529643:1|gene:GMOY007820	48	120881	1	1	1	1	2313	1	1	1	552.304	1102.59	2	1102.6	-0.0049	0	47.65	8.5e-05	R	TVSQAVETIR	L				File43 Spectrum2474 scans: 5807	emPAI	0.03
108	1	GMOY003287-PA	hypothetical protein|protein_coding|scf7180000645803:105949-114126:-1|gene:GMOY003287	47	61786	1	1	1	1	2388	1	1	1	557.846	1113.68	2	1113.68	0.001	0	47.04	3.6e-05	R	VLITTDLLAR	G				File43 Spectrum7714 scans: 11910	emPAI	0.05
109	1	GMOY000870-PA	hypothetical protein|protein_coding|scf7180000640608:23959-26892:-1|gene:GMOY000870	47	26874	1	1	1	1	3083	1	1	1	597.311	1192.61	2	1192.61	-0.0007	0	46.64	0.00014	R	SLGTADVVFER	R				File43 Spectrum5533 scans: 9373	emPAI	0.12
110	1	GMOY001475-PA	hypothetical protein|protein_coding|scf7180000641420:45475-47589:-1|gene:GMOY001475	47	69429	1	1	1	1	4792	1	1	1	688.335	1374.66	2	1374.66	-0.0009	0	46.54	8.5e-05	R	FGAYSPTNVYTR	S				File43 Spectrum4359 scans: 8002	emPAI	0.05
111	1	GMOY010816-PA	hypothetical protein|protein_coding|scf7180000652156:2206241-2233914:1|gene:GMOY010816	46	38610	1	1	1	1	2957	1	1	1	587.825	1173.64	2	1173.64	-0.0001	0	46.49	0.00013	R	QLVGETALSTR	N				File43 Spectrum3324 scans: 6810	emPAI	0.09
111	1	GMOY011810-PA	hypothetical protein|protein_coding|scf7180000652170:20460757-20461134:-1|gene:GMOY011810	46	11982	2	2	1	1	12889	1	1	1	798.033	2391.08	3	2391.08	-0.0036	0	37.62	0.0003	R	YEPQEIYAEPNCAVVTDHTR	M				File43 Spectrum4843 scans: 8577
112	1	GMOY011810-PA	hypothetical protein|protein_coding|scf7180000652170:20460757-20461134:-1|gene:GMOY011810	46	11982	2	2	1	1	12890	1	1	1	798.034	2391.08	3	2391.08	-0.0012	0	33.74	0.00078	R	YEPQEIYAEPNCAVVTDHTR	M				File43 Spectrum4742 scans: 8458	emPAI	0.29
113	1	GMOY007883-PA	hypothetical protein|protein_coding|scf7180000650701:46798-58554:1|gene:GMOY007883	46	328895	1	1	1	1	3384	1	1	1	611.807	1221.6	2	1221.6	0.0011	0	46.31	0.0001	R	IQTTQSEPYR	L				File43 Spectrum652 scans: 3610	emPAI	0.01
114	1	GMOY009083-PA	hypothetical protein|protein_coding|scf7180000651763:12595-20095:1|gene:GMOY009083	46	18408	1	1	1	1	5808	1	1	1	754.388	1506.76	2	1506.76	-0.0004	0	45.77	0.00015	R	VLDPPNPQLCAQR	I				File43 Spectrum3706 scans: 7252	emPAI	0.18
115	1	GMOY010121-PA	hypothetical protein|protein_coding|scf7180000652067:28485-36366:-1|gene:GMOY010121	46	96041	1	1	1	1	9029	1	1	1	923.471	1844.93	2	1844.93	0	0	45.56	0.00012	R	IALILPQTQDDQGDYR	H				File43 Spectrum7085 scans: 11174	emPAI	0.03
116	1	GMOY004931-PA	hypothetical protein|protein_coding|scf7180000648342:114337-124015:1|gene:GMOY004931	45	159502	1	1	1	1	1144	1	1	1	488.782	975.55	2	975.55	0.0001	0	45.45	0.00011	R	NILGGTVFR	E				File43 Spectrum6505 scans: 10511	emPAI	0.02
117	1	GMOY009228-PA	hypothetical protein|protein_coding|scf7180000651823:6393-7308:-1|gene:GMOY009228	45	19473	1	1	1	1	965	1	1	1	471.773	941.531	2	941.529	0.0012	0	45.27	8.9e-05	R	NIVEAAAVR	D				File43 Spectrum2417 scans: 5734	emPAI	0.17
118	1	GMOY011526-PA	hypothetical protein|protein_coding|scf7180000652170:6601438-6604109:1|gene:GMOY011526	45	61953	1	1	1	1	2983	1	1	1	589.306	1176.6	2	1176.6	0.0004	0	44.57	0.00021	R	VYGPECLIAR	N				File43 Spectrum6015 scans: 9934	emPAI	0.05
119	1	GMOY010734-PA	hypothetical protein|protein_coding|scf7180000652156:498693-505932:-1|gene:GMOY010734	44	41879	1	1	1	1	993	1	1	1	473.762	945.508	2	945.507	0.0018	0	43.79	0.00031	R	ATVCNLLR	T				File43 Spectrum3983 scans: 7570	emPAI	0.08
120	1	GMOY008573-PA	hypothetical protein|protein_coding|scf7180000651425:49104-51080:-1|gene:GMOY008573	44	25778	1	1	1	1	1022	1	1	1	478.281	954.548	2	954.55	-0.0016	0	43.78	9.6e-05	R	SLALELGPR	K				File43 Spectrum5713 scans: 9581	emPAI	0.13
120	1	GMOY001436-PA	hypothetical protein|protein_coding|scf7180000641386:56205-56815:-1|gene:GMOY001436	44	21125	2	2	2	2	1473	1	1	1	510.253	1018.49	2	1018.49	0.0003	0	31.76	0.0038	R	ADYPMPAVR	F				File43 Spectrum3533 scans: 7054
121	1	GMOY001436-PA	hypothetical protein|protein_coding|scf7180000641386:56205-56815:-1|gene:GMOY001436	44	21125	2	2	2	2	6441	1	1	1	809.913	1617.81	2	1617.81	0.0015	0	39.46	0.00058	R	MLDLEMNPVTGLASK	W				File43 Spectrum9083 scans: 13518	emPAI	0.34
122	1	GMOY000430-PA	hypothetical protein|protein_coding|scf7180000639782:15281-18767:1|gene:GMOY000430	44	95569	1	1	1	1	4250	1	1	1	655.333	1308.65	2	1308.65	0.0013	0	43.7	0.00018	R	CLYASAITASPR	L				File43 Spectrum4219 scans: 7841	emPAI	0.03
123	1	GMOY003590-PA	hypothetical protein|protein_coding|scf7180000646704:2284-21224:1|gene:GMOY003590	43	233319	1	1	1	1	150	1	1	1	380.221	758.428	2	758.429	-0.0008	0	43.27	0.00044	K	AGELLTR	I				File43 Spectrum1242 scans: 4341	emPAI	0.01
124	1	GMOY007145-PA	hypothetical protein|protein_coding|scf7180000650212:120851-121296:-1|gene:GMOY007145	43	15205	1	1	1	1	4000	1	1	1	644.833	1287.65	2	1287.65	0.0052	0	42.84	0.00025	R	EVADAEIAAFPR	D				File43 Spectrum5812 scans: 9697	emPAI	0.22
124	1	GMOY002867-PA	hypothetical protein|protein_coding|scf7180000644679:82443-83796:1|gene:GMOY002867	43	46128	2	2	1	1	3381	1	1	1	611.798	1221.58	2	1221.58	0.0002	0	31.28	0.0027	R	SFCQDSLLPR	I				File43 Spectrum5484 scans: 9318
125	1	GMOY002867-PA	hypothetical protein|protein_coding|scf7180000644679:82443-83796:1|gene:GMOY002867	43	46128	2	2	1	1	3383	1	1	1	611.799	1221.58	2	1221.58	0.0014	0	39.55	0.00038	R	SFCQDSLLPR	I				File43 Spectrum5570 scans: 9415	emPAI	0.07
125	1	GMOY005546-PA	hypothetical protein|protein_coding|scf7180000648635:95346-101722:-1|gene:GMOY005546	43	59413	2	2	1	1	9005	1	1	1	921.486	1840.96	2	1840.96	-0.0028	0	35.98	0.001	R	EIEIAEQEMPGIITLR	R				File43 Spectrum9572 scans: 14097
126	1	GMOY005546-PA	hypothetical protein|protein_coding|scf7180000648635:95346-101722:-1|gene:GMOY005546	43	59413	2	2	1	1	9006	1	1	1	614.66	1840.96	3	1840.96	-0.0019	0	35.17	0.0012	R	EIEIAEQEMPGIITLR	R				File43 Spectrum9579 scans: 14106	emPAI	0.11
127	1	GMOY003701-PA	hypothetical protein|protein_coding|scf7180000646922:110072-122050:1|gene:GMOY003701	42	49798	1	1	1	1	2879	1	1	1	583.848	1165.68	2	1165.68	0.0006	0	42.24	0.00012	R	AIVGNIPDVLR	N				File43 Spectrum7708 scans: 11903	emPAI	0.07
128	1	GMOY011870-PA	hypothetical protein|protein_coding|scf7180000652170:21996157-22003018:-1|gene:GMOY011870	42	40009	1	1	1	1	544	1	1	1	429.265	856.515	2	856.513	0.0016	0	42.19	0.00032	R	ALQASVLR	A				File43 Spectrum2553 scans: 5904	emPAI	0.08
129	1	GMOY007006-PA	hypothetical protein|protein_coding|scf7180000649861:11500-15008:-1|gene:GMOY007006	42	39474	1	1	1	1	4389	1	1	1	663.333	1324.65	2	1324.65	-0.0003	0	41.59	0.0003	R	NYNNVFNALTR	I				File43 Spectrum7666 scans: 11852	emPAI	0.08
130	1	GMOY009378-PA	hypothetical protein|protein_coding|scf7180000651841:235606-243839:-1|gene:GMOY009378	42	72321	1	1	1	1	4474	1	1	1	670.83	1339.65	2	1339.64	0.0014	0	41.55	0.00031	R	YMDNVISETLR	K				File43 Spectrum7104 scans: 11197	emPAI	0.05
131	1	GMOY002418-PA	hypothetical protein|protein_coding|scf7180000643634:16342-17321:-1|gene:GMOY002418	41	29366	1	1	1	1	946	1	1	1	469.742	937.47	2	937.469	0.0008	0	41.45	0.00035	R	MSDGLFLR	C				File43 Spectrum6178 scans: 10123	emPAI	0.11
132	1	GMOY001946-PA	hypothetical protein|protein_coding|scf7180000642467:87289-91839:1|gene:GMOY001946	41	54653	1	1	1	1	2521	1	1	1	564.226	1126.44	2	1126.44	-0.0013	0	41.34	7.3e-05	R	MCMADALCR	M				File43 Spectrum4240 scans: 7865	emPAI	0.06
133	1	GMOY002617-PA	hypothetical protein|protein_coding|scf7180000644097:59359-59814:1|gene:GMOY002617	41	17122	1	1	1	1	639	1	1	1	440.232	878.449	2	878.45	-0.0004	0	41.31	0.0004	R	EGYLELR	R				File43 Spectrum4329 scans: 7967	emPAI	0.2
133	1	GMOY012313-PA	hypothetical protein|protein_coding|scf7180000645625:66440-70495:1|gene:GMOY012313	41	62716	2	2	1	1	369	1	1	1	407.723	813.432	2	813.434	-0.0029	0	31.31	0.0025	R	TNVDLPR	D				File43 Spectrum1710 scans: 4896
134	1	GMOY012313-PA	hypothetical protein|protein_coding|scf7180000645625:66440-70495:1|gene:GMOY012313	41	62716	2	2	1	1	370	1	1	1	407.724	813.434	2	813.434	-0.0007	0	37.48	0.00052	R	TNVDLPR	D				File43 Spectrum1614 scans: 4785	emPAI	0.05
135	1	GMOY000195-PA	hypothetical protein|protein_coding|scf7180000639216:132863-134715:-1|gene:GMOY000195	41	59090	1	1	1	1	1969	1	1	1	536.321	1070.63	2	1070.63	-0.0002	0	41.25	0.0003	R	LAAVNALLMR	Q				File43 Spectrum7638 scans: 11820	emPAI	0.06
136	1	GMOY010661-PA	hypothetical protein|protein_coding|scf7180000652153:1438946-1462614:-1|gene:GMOY010661	41	275285	1	1	1	1	4240	1	1	1	654.836	1307.66	2	1307.65	0.0021	0	40.87	0.00041	R	ALDTMNFDLLR	N				File43 Spectrum9499 scans: 14010	emPAI	0.01
137	1	GMOY011410-PA	hypothetical protein|protein_coding|scf7180000652170:3912466-3913911:1|gene:GMOY011410	41	25017	1	1	1	1	1949	1	1	1	357.54	1069.6	3	1069.6	-0.0026	1	40.87	0.00023	K	IIEIDPDKK	Y				File43 Spectrum2166 scans: 5426	emPAI	0.13
137	1	GMOY012179-PA	hypothetical protein|protein_coding|scf7180000648022:91033-92262:1|gene:GMOY012179	41	44062	2	2	2	2	1443	1	1	1	508.3	1014.59	2	1014.59	-0.0009	0	32.06	0.0025	R	QAAIFAGLPK	N				File43 Spectrum6538 scans: 10548
138	1	GMOY012179-PA	hypothetical protein|protein_coding|scf7180000648022:91033-92262:1|gene:GMOY012179	41	44062	2	2	2	2	13761	1	1	1	858.117	2571.33	3	2571.33	0.0038	0	36.69	0.00059	R	IVAFQDAETDPIDFPIAPAFAVPK	L				File43 Spectrum11965 scans: 17068	emPAI	0.16
139	1	GMOY005442-PA	hypothetical protein|protein_coding|scf7180000648591:115103-128414:-1|gene:GMOY005442	41	376404	1	1	1	1	5638	1	1	1	747.384	1492.75	2	1492.75	0.0012	0	40.65	0.00043	K	SLTGSPSTAPLYGSR	S				File43 Spectrum3762 scans: 7318	emPAI	0.01
140	1	GMOY004732-PA	hypothetical protein|protein_coding|scf7180000648211:41887-46294:1|gene:GMOY004732	41	82163	1	1	1	1	8390	1	1	1	897.512	1793.01	2	1793.01	0.0001	0	40.62	0.00012	K	GLPPVEAYLNIPEIIR	V				File43 Spectrum12041 scans: 17167	emPAI	0.04
141	1	GMOY004379-PA	hypothetical protein|protein_coding|scf7180000648077:42903-43953:-1|gene:GMOY004379	40	27104	1	1	1	1	3040	1	1	1	594.315	1186.62	2	1186.61	0.0024	0	39.96	0.00047	K	CIADLNALAAR	A				File43 Spectrum5910 scans: 9813	emPAI	0.12
142	1	GMOY009320-PA	hypothetical protein|protein_coding|scf7180000651840:735755-748566:1|gene:GMOY009320	40	253195	1	1	1	1	2400	1	1	1	558.812	1115.61	2	1115.61	0	0	39.93	0.00064	R	QPTFINIQR	H				File43 Spectrum4997 scans: 8753	emPAI	0.01
143	1	GMOY003727-PA	hypothetical protein|protein_coding|scf7180000646985:15273-19302:1|gene:GMOY003727	40	34298	1	1	1	1	337	1	1	1	405.237	808.46	2	808.46	0.0006	0	39.92	0.00024	R	AGVIFFR	K				File43 Spectrum6892 scans: 10952	emPAI	0.1
144	1	GMOY009457-PA	hypothetical protein|protein_coding|scf7180000651846:528202-532258:1|gene:GMOY009457	40	27716	1	1	1	1	3710	1	1	1	420.916	1259.73	3	1259.73	-0.0093	0	39.82	0.00011	R	VNAIEHVIIPR	I				File43 Spectrum5787 scans: 9667	emPAI	0.12
145	1	GMOY000359-PA	hypothetical protein|protein_coding|scf7180000639579:17244-19445:1|gene:GMOY000359	40	51432	1	1	1	1	1790	1	1	1	528.313	1054.61	2	1054.61	-0.0012	0	39.53	0.00027	R	NITLATPAVR	R				File43 Spectrum4314 scans: 7949	emPAI	0.06
146	1	GMOY011516-PA	hypothetical protein|protein_coding|scf7180000652170:6455518-6469223:1|gene:GMOY011516	40	237831	1	1	1	1	2439	1	1	1	560.79	1119.57	2	1119.57	-0.0008	0	39.52	0.00076	R	TIGPTNFQSR	K				File43 Spectrum2604 scans: 5968	emPAI	0.01
147	1	GMOY004154-PA	hypothetical protein|protein_coding|scf7180000647982:162837-174036:1|gene:GMOY004154	39	58283	1	1	1	1	532	1	1	1	427.231	852.448	2	852.449	-0.0011	0	39.43	0.00042	R	FVDLFGR	F				File43 Spectrum7520 scans: 11680	emPAI	0.06
148	1	GMOY000391-PA	hypothetical protein|protein_coding|scf7180000639669:170855-175891:1|gene:GMOY000391	39	63775	1	1	1	1	1693	1	1	1	523.777	1045.54	2	1045.54	-0.0008	0	39.36	0.00072	R	IGEGLSDLSR	A				File43 Spectrum3788 scans: 7349	emPAI	0.05
149	1	GMOY008618-PA	hypothetical protein|protein_coding|scf7180000651455:343654-345139:1|gene:GMOY008618	39	54199	1	1	1	1	4766	1	1	1	686.848	1371.68	2	1371.68	0.0002	0	39.09	0.00051	R	NLLDAPAIMGDSR	R				File43 Spectrum7486 scans: 11639	emPAI	0.06
150	1	GMOY003996-PA	hypothetical protein|protein_coding|scf7180000647876:46204-74747:1|gene:GMOY003996	39	34568	1	1	1	1	1225	1	1	1	493.785	985.555	2	985.556	-0.001	0	38.71	0.00072	R	SGSPGVITLR	K				File43 Spectrum3478 scans: 6991	emPAI	0.1
151	1	GMOY008665-PA	hypothetical protein|protein_coding|scf7180000651494:133127-134900:1|gene:GMOY008665	39	25188	1	1	1	1	5259	1	1	1	723.843	1445.67	2	1445.67	-0.0016	0	38.7	0.00039	R	FYGPGGPYASFAGR	D				File43 Spectrum6434 scans: 10426	emPAI	0.13
152	1	GMOY011690-PA	hypothetical protein|protein_coding|scf7180000652170:13184908-13191707:-1|gene:GMOY011690	39	77857	1	1	1	1	4081	1	1	1	648.853	1295.69	2	1295.69	0.0009	0	38.59	0.00049	K	IVLNEPDMPIR	T				File43 Spectrum6205 scans: 10154	emPAI	0.04
153	1	GMOY006255-PA	hypothetical protein|protein_coding|scf7180000648916:54695-56405:-1|gene:GMOY006255	38	46363	1	1	1	1	790	1	1	1	454.218	906.422	2	906.423	-0.0008	0	38.5	0.00067	K	MANTDLSR	F				File43 Spectrum314 scans: 3122	emPAI	0.07
153	1	GMOY004375-PA	hypothetical protein|protein_coding|scf7180000648077:25349-27499:1|gene:GMOY004375	38	82305	3	3	2	2	99	1	1	0	367.713	733.411	2	733.412	-0.0009	0	31.03	0.0051	K	LADFLR	F				File43 Spectrum5046 scans: 8808
153	1	GMOY004375-PA	hypothetical protein|protein_coding|scf7180000648077:25349-27499:1|gene:GMOY004375	38	82305	3	3	2	2	435	1	1	1	415.268	828.521	2	828.522	-0.0012	0	30.13	0.0021	R	ALLFIPR	R				File43 Spectrum7686 scans: 11877
154	1	GMOY004375-PA	hypothetical protein|protein_coding|scf7180000648077:25349-27499:1|gene:GMOY004375	38	82305	3	3	2	2	436	1	1	1	415.268	828.521	2	828.522	-0.0006	0	32.59	0.0012	R	ALLFIPR	R				File43 Spectrum7760 scans: 11966	emPAI	0.08
155	1	GMOY010369-PA	hypothetical protein|protein_coding|scf7180000652137:5397-8439:-1|gene:GMOY010369	38	69136	1	1	1	1	3020	1	1	1	592.823	1183.63	2	1183.63	0.0008	0	38.31	0.00059	R	LNAAGQLGVGER	C				File43 Spectrum2634 scans: 6005	emPAI	0.05
156	1	GMOY000701-PA	hypothetical protein|protein_coding|scf7180000640296:63697-64703:1|gene:GMOY000701	38	24792	1	1	1	1	3931	1	1	1	639.856	1277.7	2	1277.7	-0.0004	0	37.99	0.00054	R	AASTIFLSELAR	G				File43 Spectrum8472 scans: 12821	emPAI	0.14
157	1	GMOY004937-PA	hypothetical protein|protein_coding|scf7180000648342:175016-186574:-1|gene:GMOY004937	37	46340	1	1	1	1	879	1	1	1	461.261	920.507	2	920.508	-0.0011	0	37.24	0.00097	R	LLTYNAAR	M				File43 Spectrum2200 scans: 5465	emPAI	0.07
158	1	GMOY008738-PA	hypothetical protein|protein_coding|scf7180000651516:84649-103389:1|gene:GMOY008738	37	104738	1	1	1	1	994	1	1	1	474.243	946.471	2	946.472	-0.0004	0	36.96	0.0013	R	TGAEIATER	N				File43 Spectrum318 scans: 3129	emPAI	0.03
159	1	GMOY006978-PA	hypothetical protein|protein_coding|scf7180000649782:11756-13500:-1|gene:GMOY006978	37	54316	1	1	1	1	464	1	1	1	419.234	836.454	2	836.455	-0.0006	0	36.87	0.00056	R	VGPYVFR	E				File43 Spectrum4263 scans: 7890	emPAI	0.06
160	1	GMOY008340-PA	hypothetical protein|protein_coding|scf7180000651142:9661-19215:-1|gene:GMOY008340	37	27410	1	1	1	1	2959	1	1	1	587.832	1173.65	2	1173.65	-0.0005	1	36.78	0.0011	R	YVAATNPGIRL	-				File43 Spectrum5436 scans: 9263	emPAI	0.12
161	1	GMOY004639-PA	hypothetical protein|protein_coding|scf7180000648171:62949-64058:1|gene:GMOY004639	37	42520	1	1	1	1	6194	1	1	1	783.91	1565.81	2	1565.8	0.0009	0	36.73	0.0011	R	AVIDPQSLNEPEVR	K				File43 Spectrum4933 scans: 8680	emPAI	0.08
162	1	GMOY010526-PA	hypothetical protein|protein_coding|scf7180000652149:693773-725214:-1|gene:GMOY010526	37	165041	1	1	1	1	6151	1	1	1	778.943	1555.87	2	1555.87	-0.0005	0	36.65	0.00062	R	SAQNVIFPVLIAER	D				File43 Spectrum10109 scans: 14735	emPAI	0.02
163	1	GMOY008583-PA	hypothetical protein|protein_coding|scf7180000651435:5810-6208:1|gene:GMOY008583	36	15203	1	1	1	1	1138	1	1	1	487.771	973.527	2	973.527	0.0004	0	36.5	0.0017	R	MNVLADALK	C				File43 Spectrum6407 scans: 10394	emPAI	0.22
164	1	GMOY006294-PA	hypothetical protein|protein_coding|scf7180000648948:31720-79429:-1|gene:GMOY006294	36	82824	1	1	1	1	84	1	1	1	367.195	732.376	2	732.377	-0.0002	0	36.36	0.0015	R	GSSDLVR	S				File43 Spectrum145 scans: 2775	emPAI	0.04
165	1	GMOY010280-PA	hypothetical protein|protein_coding|scf7180000652113:112337-122110:-1|gene:GMOY010280	36	152923	1	1	1	1	843	1	1	1	457.758	913.502	2	913.498	0.0036	0	36.18	0.001	K	AAVENAIAR	R				File43 Spectrum2173 scans: 5434	emPAI	0.02
166	1	GMOY007570-PA	hypothetical protein|protein_coding|scf7180000650503:17813-19537:1|gene:GMOY007570	36	29714	1	1	1	1	783	1	1	1	453.245	904.476	2	904.477	-0.0003	0	36.12	0.0019	R	NFNEILR	V				File43 Spectrum4713 scans: 8421	emPAI	0.12
167	1	GMOY011014-PA	hypothetical protein|protein_coding|scf7180000652159:1018271-1019242:-1|gene:GMOY011014	36	35995	1	1	1	1	1059	1	1	1	480.27	958.525	2	958.528	-0.003	0	36.02	0.002	R	YVFLVYR	Q				File43 Spectrum7410 scans: 11548	emPAI	0.09
168	1	GMOY001323-PA	hypothetical protein|protein_coding|scf7180000641282:5518-6419:1|gene:GMOY001323	36	19831	1	1	1	1	2742	1	1	1	575.301	1148.59	2	1148.59	-0.0027	0	35.89	0.0016	R	MLADPSAAFVK	A				File43 Spectrum5766 scans: 9641	emPAI	0.17
169	1	GMOY011652-PA	hypothetical protein|protein_coding|scf7180000652170:11285211-11287331:1|gene:GMOY011652	36	35702	1	1	1	1	398	1	1	1	410.737	819.459	2	819.46	-0.001	0	35.79	0.0016	R	FANSLLR	G				File43 Spectrum4008 scans: 7599	emPAI	0.09
170	1	GMOY008106-PA	hypothetical protein|protein_coding|scf7180000650913:57984-67973:1|gene:GMOY008106	36	50200	1	1	1	1	3385	1	1	1	611.814	1221.61	2	1221.61	-0.001	0	35.63	0.0016	R	WYDNVITVGR	E				File43 Spectrum6301 scans: 10271	emPAI	0.07
170	1	GMOY000816-PA	hypothetical protein|protein_coding|scf7180000640488:9744-11238:1|gene:GMOY000816	35	30247	3	3	2	2	722	1	1	1	448.217	894.42	2	894.419	0.0005	0	32.08	0.0025	R	NSLSDFGR	Y				File43 Spectrum2648 scans: 6021
170	1	GMOY000816-PA	hypothetical protein|protein_coding|scf7180000640488:9744-11238:1|gene:GMOY000816	35	30247	3	3	2	2	4071	1	1	1	648.335	1294.65	2	1294.66	-0.001	0	30.14	0.0047	R	DFPLSGYVELR	Y				File43 Spectrum9458 scans: 13961
171	1	GMOY000816-PA	hypothetical protein|protein_coding|scf7180000640488:9744-11238:1|gene:GMOY000816	35	30247	3	3	2	2	4072	1	1	1	648.336	1294.66	2	1294.66	0.0008	0	31.15	0.0035	R	DFPLSGYVELR	Y				File43 Spectrum9383 scans: 13868	emPAI	0.23
172	1	GMOY003934-PA	hypothetical protein|protein_coding|scf7180000647834:2837-7518:-1|gene:GMOY003934	35	100155	1	1	1	1	3665	1	1	1	629.314	1256.61	2	1256.62	-0.0015	0	34.88	0.0014	R	TGEWGAVPDVAR	D				File43 Spectrum5289 scans: 9088	emPAI	0.03
173	1	GMOY009534-PA	hypothetical protein|protein_coding|scf7180000651846:1821648-1823052:-1|gene:GMOY009534	35	42294	1	1	1	1	285	1	1	1	398.212	794.409	2	794.411	-0.0015	0	34.71	0.0013	R	LFAGTMR	Y				File43 Spectrum2727 scans: 6114	emPAI	0.08
174	1	GMOY012116-PA	hypothetical protein|protein_coding|scf7180000646922:69194-72258:-1|gene:GMOY012116	35	51050	1	1	1	1	626	1	1	1	439.252	876.489	2	876.489	0.0001	0	34.61	0.002	R	LFITMPR	R				File43 Spectrum6890 scans: 10950	emPAI	0.07
175	1	GMOY000582-PA	hypothetical protein|protein_coding|scf7180000640123:100992-102814:1|gene:GMOY000582	34	37886	1	1	1	1	1264	1	1	1	494.295	986.576	2	986.576	-0.0003	0	34.46	0.0014	K	LLIGITSDR	G				File43 Spectrum5584 scans: 9431	emPAI	0.09
176	1	GMOY011663-PA	hypothetical protein|protein_coding|scf7180000652170:11567552-11578667:-1|gene:GMOY011663	34	23449	1	1	1	1	1384	1	1	1	504.781	1007.55	2	1007.55	0.0005	1	34.33	0.0017	R	IMLYPSRL	-	Oxidation (M)	0.01000000.0		File43 Spectrum6268 scans: 10232	emPAI	0.14
177	1	GMOY008668-PA	hypothetical protein|protein_coding|scf7180000651496:45938-47894:-1|gene:GMOY008668	34	60990	1	1	1	1	2097	1	1	1	542.33	1082.65	2	1082.64	0.0013	0	34.01	0.0006	R	VLATPVSVAAR	G				File43 Spectrum3632 scans: 7168	emPAI	0.05
178	1	GMOY009189-PA	hypothetical protein|protein_coding|scf7180000651788:69310-75029:-1|gene:GMOY009189	34	45572	1	1	1	1	2305	1	1	1	551.809	1101.6	2	1101.6	-0.0002	0	33.99	0.0021	R	ALELTTDALR	L				File43 Spectrum5624 scans: 9476	emPAI	0.07
179	1	GMOY006986-PA	hypothetical protein|protein_coding|scf7180000649829:28014-31770:1|gene:GMOY006986	34	35345	1	1	1	1	396	1	1	1	410.719	819.424	2	819.424	-0.0001	0	33.74	0.0034	R	NAFAELR	M				File43 Spectrum3354 scans: 6844	emPAI	0.1
180	1	GMOY008463-PA	hypothetical protein|protein_coding|scf7180000651334:79177-86109:1|gene:GMOY008463	34	105563	1	1	1	1	1713	1	1	1	524.775	1047.54	2	1047.53	0.0005	0	33.68	0.0023	K	SPVYEALNR	A				File43 Spectrum3089 scans: 6539	emPAI	0.03
181	1	GMOY000405-PA	hypothetical protein|protein_coding|scf7180000639690:109896-110381:1|gene:GMOY000405	33	14411	1	1	1	1	1858	1	1	1	531.28	1060.55	2	1060.55	0.0002	0	33.49	0.0028	R	HAALPYAYR	T				File43 Spectrum2490 scans: 5826	emPAI	0.24
182	1	GMOY004361-PA	hypothetical protein|protein_coding|scf7180000648063:69317-115268:-1|gene:GMOY004361	33	92063	1	1	1	1	2194	1	1	1	546.289	1090.56	2	1090.57	-0.0014	0	32.78	0.0029	R	EAGVFEAIQK	S				File43 Spectrum4694 scans: 8400	emPAI	0.04
183	1	GMOY002531-PA	hypothetical protein|protein_coding|scf7180000643919:113081-126728:-1|gene:GMOY002531	32	501664	1	1	1	1	1529	1	1	1	514.79	1027.57	2	1027.57	0	0	32.32	0.0017	R	ELDQIIAAR	K				File43 Spectrum4620 scans: 8307	emPAI	0.01
184	1	GMOY007191-PA	hypothetical protein|protein_coding|scf7180000650239:63083-66269:1|gene:GMOY007191	32	109968	1	1	1	1	185	1	1	1	384.704	767.393	2	767.393	0.0003	0	32.31	0.0021	R	INGPDPR	T				File43 Spectrum141 scans: 2769	emPAI	0.03
185	1	GMOY007077-PA	hypothetical protein|protein_coding|scf7180000650090:12913-13470:1|gene:GMOY007077	32	15673	1	1	1	1	938	1	1	1	468.698	935.382	2	935.381	0.001	0	32.11	0.00062	R	TCSSYYR	E				File43 Spectrum209 scans: 2923	emPAI	0.22
186	1	GMOY007910-PA	hypothetical protein|protein_coding|scf7180000650717:22174-31310:1|gene:GMOY007910	32	103638	1	1	1	1	2283	1	1	1	551.286	1100.56	2	1100.56	0.0009	0	32.1	0.0031	R	LQGTNVNEAR	E				File43 Spectrum240 scans: 2988	emPAI	0.03
187	1	GMOY007353-PA	hypothetical protein|protein_coding|scf7180000650305:30603-33421:-1|gene:GMOY007353	32	43357	1	1	1	1	9238	1	1	1	936.451	1870.89	2	1870.89	-0.0019	0	32.08	0.002	K	GFIGPGVDVPAPDMGTGER	E				File43 Spectrum7631 scans: 11812	emPAI	0.08
188	1	GMOY010303-PA	hypothetical protein|protein_coding|scf7180000652121:423-1008:-1|gene:GMOY010303	32	8480	1	1	1	1	15079	1	1	1	1445.14	2888.27	2	2888.26	0.0087	0	31.81	0.00066	R	IYEPVCGTDGNTYPNPCEFLCVQR	K				File43 Spectrum9268 scans: 13734	emPAI	0.42
189	1	GMOY001805-PA	hypothetical protein|protein_coding|scf7180000642139:70922-76884:1|gene:GMOY001805	32	45892	1	1	1	1	772	1	1	1	452.222	902.429	2	902.429	-0.0001	0	31.78	0.0024	R	FAFEYAR	Q				File43 Spectrum5127 scans: 8904	emPAI	0.07
189	1	GMOY002541-PA	hypothetical protein|protein_coding|scf7180000643919:164391-167324:-1|gene:GMOY002541	32	92967	2	2	1	1	606	1	1	1	437.237	872.459	2	872.46	-0.0009	0	31.27	0.0038	R	DLDEIIR	Q				File43 Spectrum4850 scans: 8585
190	1	GMOY002541-PA	hypothetical protein|protein_coding|scf7180000643919:164391-167324:-1|gene:GMOY002541	32	92967	2	2	1	1	607	1	1	1	437.237	872.46	2	872.46	-0.0001	0	30.49	0.0045	R	DLDEIIR	Q				File43 Spectrum4937 scans: 8685	emPAI	0.04
191	1	GMOY008286-PA	hypothetical protein|protein_coding|scf7180000651113:19218-21520:1|gene:GMOY008286	32	64293	1	1	1	1	1185	1	1	1	491.806	981.597	2	981.597	-0.0003	0	31.71	0.00067	R	AVLLNSLPR	H				File43 Spectrum5723 scans: 9593	emPAI	0.05
192	1	GMOY008627-PA	hypothetical protein|protein_coding|scf7180000651460:317-1373:-1|gene:GMOY008627	32	21993	1	1	1	1	3980	1	1	1	429.226	1284.66	3	1284.66	-0.0023	0	31.53	0.0031	R	VDNYILQHQR	Q				File43 Spectrum2157 scans: 5415	emPAI	0.15
193	1	GMOY004246-PA	hypothetical protein|protein_coding|scf7180000648009:261016-262479:1|gene:GMOY004246	31	46994	1	1	1	1	1371	1	1	1	503.273	1004.53	2	1004.53	-0.0005	0	31.25	0.0052	R	DLMLTLSGR	A				File43 Spectrum7261 scans: 11377	emPAI	0.07
194	1	GMOY009375-PA	hypothetical protein|protein_coding|scf7180000651840:1672676-1673975:-1|gene:GMOY009375	30	45473	1	1	1	1	1691	1	1	1	523.751	1045.49	2	1045.49	-0.0004	0	30.18	0.0032	R	ICLPPMCR	C				File43 Spectrum4880 scans: 8619	emPAI	0.07
195	1	GMOY010455-PA	hypothetical protein|protein_coding|scf7180000652144:132761-148324:-1|gene:GMOY010455	30	91253	1	1	1	1	1217	1	1	1	493.287	984.56	2	984.56	-0.0001	0	30.17	0.0032	M	LSEIPSIAR	R				File43 Spectrum5660 scans: 9519	emPAI	0.04

## Sheet: In Solution Protein summary
prot_hit_num	prot_family_member	prot_acc	prot_desc	prot_score	prot_mass	prot_matches	prot_matches_sig	prot_sequences	prot_sequences_sig	emPAI
1	1	GMOY002708-PA	GmmPer66|protein_coding|scf7180000644279:138091-144189:-1|gene:GMOY002708	14303	67871	388	388	10	10	0.85
2	1	GMOY001525-PA	FOF 1 type ATP sythase subunit β|protein_coding|scf7180000641491:115440-116963:-1|gene:GMOY001525	2194	54546	107	107	8	8	1.02
3	2	GMOY001776-PA	Actin|protein_coding|scf7180000642081:269290-271349:-1|gene:GMOY001776	531	42191	28	28	6	6	0.7
3	1	GMOY007085-PA	Actin 87E|protein_coding|scf7180000650090:80493-84134:-1|gene:GMOY007085	911	48871	43	43	6	6	0.69
4	1	GMOY008764-PA	FOF 1 type ATP synthase subunit α|protein_coding|scf7180000651536:25240-28076:-1|gene:GMOY008764	709	59624	27	27	11	11	0.91
5	1	GMOY007063-PA	Midgut trypsin|protein_coding|scf7180000650063:13373-14149:1|gene:GMOY007063	578	27857	20	20	6	6	0.97
6	1	GMOY004647-PA	Multicopper oxidase superfamily|protein_coding|scf7180000648171:146033-149609:-1|gene:GMOY004647	482	73250	21	21	2	2	0.09
7	1	GMOY002029-PA	Vacuolar H+ Atpase v1 sector subunit β|protein_coding|scf7180000642607:3510-5697:-1|gene:GMOY002029	450	54466	10	10	4	4	0.26
8	1	GMOY011520-PA	Leukotrien A4 hydrolase/aminopeptidase LTA4H|protein_coding|scf7180000652170:6501426-6517991:1|gene:GMOY011520	323	220281	7	7	2	2	0.03
9	1	GMOY003579-PA	E1-E2 ATPase|protein_coding|scf7180000646649:4089-72915:-1|gene:GMOY003579	300	98800	12	12	4	4	0.18
10	1	GMOY005703-PA	Myosin heavy chain|protein_coding|scf7180000648716:31353-60252:-1|gene:GMOY005703	251	269181	10	10	6	6	0.09
11	1	GMOY008993-PA	Vacuolar H+ subunit α|protein_coding|scf7180000651745:221590-223660:1|gene:GMOY008993	231	68466	9	9	5	5	0.32
12	1	GMOY009756-PA	GmmPro3|protein_coding|scf7180000651876:8343-19013:-1|gene:GMOY009756	228	87088	9	9	4	4	0.16
13	1	GMOY011773-PA	Serine protease|protein_coding|scf7180000652170:18794781-18853236:-1|gene:GMOY011773	211	497990	8	8	6	6	0.05
14	1	GMOY010150-PA	Carbon nitrogen hydrolase|protein_coding|scf7180000652074:42013-44019:1|gene:GMOY010150	195	65547	5	5	2	2	0.16
15	1	GMOY002950-PA	Antigen 5 precursor (Tag 5)|protein_coding|scf7180000644883:23579-25201:1|gene:GMOY002950	171	29631	6	6	2	2	0.24
16	1	GMOY003481-PA	Mitochondrial processing peptidase subunit β|protein_coding|scf7180000646258:347269-349066:1|gene:GMOY003481	160	52610	5	5	2	2	0.13
17	1	GMOY002377-PA	Myosin class II heavy chain|protein_coding|scf7180000643566:75824-106403:1|gene:GMOY002377	160	126931	5	5	5	5	0.14
18	1	GMOY002634-PA	Pyrroline 5-carboxylate reductase-1|protein_coding|scf7180000644138:4406-8365:1|gene:GMOY002634	157	28676	4	4	3	3	0.39
19	1	GMOY001240-PA	TITIN-like protein|protein_coding|scf7180000641100:6003-82172:1|gene:GMOY001240	151	1918800	5	5	4	4	0.01
20	1	GMOY000207-PA	NADH-ubiquitone oxidoreductase subunit 10|protein_coding|scf7180000639217:120157-120848:1|gene:GMOY000207	146	19959	3	3	1	1	0.17
21	1	GMOY002421-PA	HSP60|protein_coding|scf7180000643634:45290-47080:1|gene:GMOY002421	146	60924	4	4	3	3	0.17
22	1	GMOY000226-PA	ATPase 116 kDa subunit α isoform 1|protein_coding|scf7180000639242:128371-131789:-1|gene:GMOY000226	145	97940	3	3	2	2	0.07
23	1	GMOY000176-PA	Beta-tubulin|protein_coding|scf7180000639142:1109-6491:1|gene:GMOY000176	142	97851	4	4	2	2	0.07
24	1	GMOY008757-PA	Hypothetical conserved protein|protein_coding|scf7180000651525:26578-58638:1|gene:GMOY008757	140	190035	2	2	2	2	0.03
25	1	GMOY008378-PA	Glutamate dehydrogenase|protein_coding|scf7180000651191:77674-77853:1|gene:GMOY008378	137	7009	2	2	1	1	0.51
26	1	GMOY012131-PA	Aldehyde dehydrogenase|protein_coding|scf7180000652160:5259569-5261264:-1|gene:GMOY012131	137	59736	3	3	2	2	0.11
27	1	GMOY000267-PA	Histone H2A|protein_coding|scf7180000639349:12-385:1|gene:GMOY000267	137	13141	5	5	2	2	0.59
28	1	GMOY003541-PA	Cytochrome C oxidase|protein_coding|scf7180000646489:3473-3919:-1|gene:GMOY003541	136	16793	4	4	2	2	0.44
29	1	GMOY001277-PA	Fascilin|protein_coding|scf7180000641192:60782-74961:-1|gene:GMOY001277	135	100736	4	4	3	3	0.14
30	1	GMOY000466-PA	C-type lectin|protein_coding|scf7180000639890:92541-96329:-1|gene:GMOY000466	131	29286	3	3	2	2	0.24
31	1	GMOY010278-PA	Cyclophorine type peptidyl-prolyl cis trans isomerase|protein_coding|scf7180000652113:88443-106052:-1|gene:GMOY010278	131	37087	3	3	1	1	0.09
32	1	GMOY005468-PA	cynaptobrevin/VAMP like protein|protein_coding|scf7180000648602:77072-82820:-1|gene:GMOY005468	130	85149	2	2	2	2	0.08
33	1	GMOY004743-PA	hydroxyacyl CoA dehydrogenase|protein_coding|scf7180000648218:36720-39514:1|gene:GMOY004743	126	83266	3	3	2	2	0.08
34	1	GMOY003176-PA	Zeelin 1|protein_coding|scf7180000645539:55852-74333:-1|gene:GMOY003176	118	41494	4	4	3	3	0.26
35	1	GMOY002613-PA	α tubulin|protein_coding|scf7180000644097:25394-30911:-1|gene:GMOY002613	116	50591	3	3	1	1	0.13
36	1	GMOY009531-PA	Zinc carboxypeptidase|protein_coding|scf7180000651846:1752302-1755665:-1|gene:GMOY009531	109	56709	2	2	1	1	0.06
37	1	GMOY000153-PA	Chitinase Chit1 precursor|protein_coding|scf7180000639097:81864-88062:-1|gene:GMOY000153	108	93636	4	4	2	2	0.07
38	1	GMOY008040-PA	Thioredoxin peroxidase|protein_coding|scf7180000650867:14263-14847:-1|gene:GMOY008040	107	22100	4	4	3	3	0.53
39	1	GMOY009587-PA	GmmPro2|protein_coding|scf7180000651846:3027739-3029048:1|gene:GMOY009587	106	13436	7	7	2	2	0.57
40	1	GMOY006849-PA	NADH ubiquitone oxidoreductase β18 subunit (NDUFB7)|protein_coding|scf7180000649373:19643-19996:-1|gene:GMOY006849	99	14139	9	9	1	1	0.24
41	1	GMOY000406-PA	Protein of unknown function |protein_coding|scf7180000639690:116094-116737:1|gene:GMOY000406	97	19050	3	3	2	2	0.38
42	1	GMOY011809-PA	GmmPro1|protein_coding|scf180000652170:20458458-20459051|gene:GMOY011809	95	11621	3	3	2	2	0.18
43	1	GMOY011770-PA	Short chain alcohol dehydrogenase|protein_coding|scf7180000652170:18773763-18774713:1|gene:GMOY011770	95	27102	3	3	3	3	0.42
44	1	GMOY000747-PA	Nucleoside diphosphate kinase|protein_coding|scf7180000640387:14204-14952:1|gene:GMOY000747	95	22527	2	2	2	2	0.32
44	2	GMOY000268-PA	Histone H4|protein_coding|scf7180000639349:889-3203:-1|gene:GMOY000268	92	13449	3	3	3	3	0.97
45	1	GMOY009985-PA	Histone H4|protein_coding|scf7180000652007:172458-174909:1|gene:GMOY009985	95	25338	5	5	5	5	0.86
46	1	GMOY007523-PA	Collagen type XV|protein_coding|scf7180000650446:20021-25319:1|gene:GMOY007523	95	169063	2	2	2	2	0.04
47	1	GMOY006959-PA	Carboxylesterase|protein_coding|scf7180000649701:32722-38010:1|gene:GMOY006959	92	62888	3	3	2	2	0.11
48	1	GMOY010107-PA	Translation initiation inhibitor|protein_coding|scf7180000652064:120228-121390:-1|gene:GMOY010107	88	14906	1	1	1	1	0.23
49	1	GMOY003306-PA	TsetseEP protein|protein_coding|scf7180000645808:6973-8060:1|gene:GMOY003306	83	35490	6	6	2	2	0.2
50	1	GMOY000023-PA	Protein of unknown function|protein_coding|scf7180000638894:91900-92229:-1|gene:GMOY000023	83	9284	1	1	1	1	0.37
51	1	GMOY002770-PA	Calponin|protein_coding|scf7180000644388:50288-59191:-1|gene:GMOY002770	83	264160	2	2	2	2	0.02
52	1	GMOY011989-PA	Acyl CoA dehydrogenase|protein_coding|scf7180000649844:126215-131214:-1|gene:GMOY011989	82	46490	3	3	3	3	0.23
53	1	GMOY009757-PA	Trypsin|protein_coding|scf7180000651876:19259-21588:1|gene:GMOY009757	79	30818	2	2	2	2	0.23
54	1	GMOY006034-PB	Mitochondrial ADP/ATP carrier protein|protein_coding|scf7180000648818:64963-72628:-1|gene:GMOY006034	77	34785	2	2	1	1	0.1
55	1	GMOY005492-PA	Prohibitin|protein_coding|scf7180000648617:82963-83852:-1|gene:GMOY005492	77	30306	2	2	2	2	0.23
56	1	GMOY006839-PA	Trypsin like serine protease inhibitor|protein_coding|scf7180000649348:12551-19113:-1|gene:GMOY006839	77	30406	2	2	1	1	0.11
57	1	GMOY003216-PA	HSP cognate 2 (HSP 70)|protein_coding|scf7180000645625:136161-138241:1|gene:GMOY003216	77	72671	1	1	1	1	0.05
58	1	GMOY007699-PA	Ribosomal protein S3 |protein_coding|scf7180000650612:302298-303685:1|gene:GMOY007699	74	33369	1	1	1	1	0.1
59	1	GMOY012011-PA	Arylphorin|protein_coding|scf7180000649808:31083-33780:1|gene:GMOY012011	74	104685	2	2	2	2	0.06
60	1	GMOY011766-PA	40S ribosomal proteinS3|protein_coding|scf7180000652170:18700671-18701682:-1|gene:GMOY011766	70	28524	2	2	1	1	0.12
61	1	GMOY009366-PA	Hu Li Tai Shao isoform Q + R|protein_coding|scf7180000651840:1448561-1466944:1|gene:GMOY009366	70	232686	1	1	1	1	0.01
62	1	GMOY004384-PA	Glycogen debranching enzyme|protein_coding|scf7180000648078:157375-167838:-1|gene:GMOY004384	68	168610	1	1	1	1	0.02
63	1	GMOY001361-PA	40S ribosomal protein S8|protein_coding|scf7180000641295:26523-27978:1|gene:GMOY001361	67	27129	2	2	1	1	0.26
64	1	GMOY001291-PA	Peroxisomal multifunctional enzyme type 2|protein_coding|scf7180000641229:21407-23269:-1|gene:GMOY001291	67	64747	1	1	1	1	0.05
65	1	GMOY010752-PA	Transloson associated protein TRAP δ subunit|protein_coding|scf7180000652156:1013793-1014372:1|gene:GMOY010752	66	18646	1	1	1	1	0.18
66	1	GMOY000765-PA	Adenosyl homocysteinase|protein_coding|scf7180000640407:42784-45946:-1|gene:GMOY000765	66	56204	1	1	1	1	0.06
67	1	GMOY010142-PA	Midgut trypsin|protein_coding|scf7180000652074:7344-8388:-1|gene:GMOY010142	65	34372	1	1	1	1	0.1
68	1	GMOY011932-PA	Succinyl CoA sythetase α subunit|protein_coding|scf7180000652170:24097376-24104331:1|gene:GMOY011932	65	100550	2	2	1	1	0.03
69	1	GMOY003645-PA	Tetraspanin 42 E1|protein_coding|scf7180000646822:70642-76063:1|gene:GMOY003645	64	24333	1	1	1	1	0.14
70	1	GMOY007917-PA	Acytyl CoA sythetase |protein_coding|scf7180000650729:3995-15239:-1|gene:GMOY007917	63	68272	1	1	1	1	0.05
71	1	GMOY002604-PA	60S ribosomal protein|protein_coding|scf7180000644077:58952-59743:1|gene:GMOY002604	62	24366	2	2	2	2	0.29
72	1	GMOY009685-PA	Vinculin/α catenin|protein_coding|scf7180000651846:5726876-5735124:-1|gene:GMOY009685	62	106926	1	1	1	1	0.03
73	1	GMOY009145-PA	Prohibitn-like protein|protein_coding|scf7180000651771:1955628-1968415:1|gene:GMOY009145	62	37451	2	2	2	2	0.18
74	1	GMOY006173-PA	Multifunctional chaperone|protein_coding|scf7180000648874:157338-167023:1|gene:GMOY006173	62	28310	1	1	1	1	0.12
75	1	GMOY003494-PA	60S ribosomal protein L10|protein_coding|scf7180000646258:462494-470360:-1|gene:GMOY003494	60	107459	3	3	1	1	0.06
76	1	GMOY001303-PA	Cuticular protein (CB_4_domain)|protein_coding|scf7180000641233:10114-13239:1|gene:GMOY001303	60	45149	2	2	2	2	0.15
77	1	GMOY012268-PA	Protein of unknown function|protein_coding|scf7180000648754:47965-48285:-1|gene:GMOY012268	59	10522	1	1	1	1	0.33
78	1	GMOY001589-PA	Enoyl CoA hydratase|protein_coding|scf7180000641554:79886-85019:1|gene:GMOY001589	58	60838	1	1	1	1	0.05
79	1	GMOY008462-PA	Transglycosidase|protein_coding|scf7180000651334:67430-72242:1|gene:GMOY008462	58	75401	1	1	1	1	0.04
80	1	GMOY000672-PA	Trypsin|protein_coding|scf7180000640286:76772-77693:1|gene:GMOY000672	57	31053	1	1	1	1	0.11
81	1	GMOY002973-PA	Adenosine deamise related growth factor C|protein_coding|scf7180000644950:57621-77206:-1|gene:GMOY002973	57	233372	2	1	2	1	0.01
82	1	GMOY008464-PA	Serine/argenine protein 55|protein_coding|scf7180000651334:88023-94383:1|gene:GMOY008464	57	40209	1	1	1	1	0.08
83	1	GMOY007620-PA	NADH ubiquitone oxidoreductase NDUF A9/ 39 kDa|protein_coding|scf7180000650553:408823-410766:1|gene:GMOY007620	56	52927	1	1	1	1	0.06
84	1	GMOY000340-PA	Mitochondrial chaperonin|protein_coding|scf7180000639576:24426-25057:1|gene:GMOY000340	56	11263	1	1	1	1	0.31
85	1	GMOY009131-PA	Dehydrogenase|protein_coding|scf7180000651771:910771-955907:-1|gene:GMOY009131	56	47220	1	1	1	1	0.07
86	1	GMOY004070-PA	60S ribosomal protein L14|protein_coding|scf7180000647940:20449-21524:-1|gene:GMOY004070	55	19496	1	1	1	1	0.17
87	1	GMOY006808-PA	Eukaryotic initiation factor|protein_coding|scf7180000649336:10072-13836:1|gene:GMOY006808	55	135974	1	1	1	1	0.02
88	1	GMOY004149-PA	Catalase|protein_coding|scf7180000647982:3201-19384:1|gene:GMOY004149	55	57390	2	2	2	2	0.12
89	1	GMOY000473-PA	Glyceraldehyde -3- phosphate dehydrogenase|protein_coding|scf7180000639890:185361-186362:-1|gene:GMOY000473	54	35868	1	1	1	1	0.09
90	1	GMOY000656-PA	Amine oxidase|protein_coding|scf7180000640257:51-1517:1|gene:GMOY000656	54	56225	1	1	1	1	0.06
91	1	GMOY003710-PA	Ribosomal protein L8|protein_coding|scf7180000646966:80949-89157:-1|gene:GMOY003710	54	87313	2	1	1	1	0.04
92	1	GMOY008845-PA	C-type lectin|protein_coding|scf7180000651618:25120-25870:1|gene:GMOY008845	54	25361	1	1	1	1	0.13
93	1	GMOY002199-PA	Translation elongation factor EF1 α / tu|protein_coding|scf7180000642974:49446-50837:1|gene:GMOY002199	53	50714	1	1	1	1	0.06
94	1	GMOY009357-PA	Succinyl CoA sythetase flavoprotein S-unit|protein_coding|scf7180000651840:1319933-1321145:1|gene:GMOY009357	53	37973	2	2	2	2	0.18
95	1	GMOY011691-PA	Ferridoxin|protein_coding|scf7180000652170:13209700-13214085:-1|gene:GMOY011691	53	84984	3	3	3	3	0.12
96	1	GMOY007520-PA	GTP binding ADP ribosylation factor|protein_coding|scf7180000650443:93189-94229:1|gene:GMOY007520	52	21488	1	1	1	1	0.16
97	1	GMOY005309-PA	Midgut trypsin|protein_coding|scf7180000648528:54738-56638:-1|gene:GMOY005309	52	53087	2	2	2	2	0.13
98	1	GMOY012049-PA	HSP 70|protein_coding|scf7180000652155:208901-210859:1|gene:GMOY012049	51	71621	1	1	1	1	0.05
99	1	GMOY001611-PA	Asparaginyl - tRNA synthetase|protein_coding|scf7180000641630:45230-46955:-1|gene:GMOY001611	50	60638	1	1	1	1	0.05
100	1	GMOY003765-PA	Radixin|protein_coding|scf7180000647120:50875-64853:1|gene:GMOY003765	50	70470	1	1	1	1	0.05
101	1	GMOY005519-PA	chitinase like protein|protein_coding|scf7180000648628:20365-26049:1|gene:GMOY005519	49	49205	2	2	2	2	0.14
102	1	GMOY003659-PA	Succinate dehydrogenase|protein_coding|scf7180000646825:64347-75677:-1|gene:GMOY003659	49	36375	2	2	2	2	0.19
103	1	GMOY001824-PA	NADH dehydrogenase flavoprotein 1|protein_coding|scf7180000642166:1406-3204:1|gene:GMOY001824	49	54314	1	1	1	1	0.06
104	1	GMOY004591-PA	Thiolase|protein_coding|scf7180000648156:3133-6815:-1|gene:GMOY004591	49	50671	1	1	1	1	0.07
105	1	GMOY010357-PA	Glycosyltransferase 67 kDa subunit precursor|protein_coding|scf7180000652136:116209-117703:1|gene:GMOY010357	48	41119	1	1	1	1	0.08
106	1	GMOY007443-PA	Aminopeptidase M17 family|protein_coding|scf7180000650392:22142-24500:1|gene:GMOY007443	48	63246	1	1	1	1	0.05
107	1	GMOY007820-PA	Leukotriene A4 hydrolase|protein_coding|scf7180000650671:1524166-1529643:1|gene:GMOY007820	48	120881	1	1	1	1	0.03
108	1	GMOY003287-PA	Eukaryotic initiation factor 4A|protein_coding|scf7180000645803:105949-114126:-1|gene:GMOY003287	47	61786	1	1	1	1	0.05
109	1	GMOY000870-PA	RNA and export factor binding protein|protein_coding|scf7180000640608:23959-26892:-1|gene:GMOY000870	47	26874	1	1	1	1	0.12
110	1	GMOY001475-PA	β-N-acetylhexosaminidase|protein_coding|scf7180000641420:45475-47589:-1|gene:GMOY001475	47	69429	1	1	1	1	0.05
111	1	GMOY010816-PA	Cytochrome b561|protein_coding|scf7180000652156:2206241-2233914:1|gene:GMOY010816	46	38610	1	1	1	1	0.09
112	1	GMOY011810-PA	GmmPer12|protein_coding|scf7180000652170:20460757-20461134:-1|gene:GMOY011810	46	11982	2	2	1	1	0.29
113	1	GMOY007883-PA	Serine protease inhibitor|protein_coding|scf7180000650701:46798-58554:1|gene:GMOY007883	46	328895	1	1	1	1	0.01
114	1	GMOY009083-PA	C-type lectin|protein_coding|scf7180000651763:12595-20095:1|gene:GMOY009083	46	18408	1	1	1	1	0.18
115	1	GMOY010121-PA	Dipeptidyl aminopeptidase|protein_coding|scf7180000652067:28485-36366:-1|gene:GMOY010121	46	96041	1	1	1	1	0.03
116	1	GMOY004931-PA	NADH - ubiquinone oxidoreductase|protein_coding|scf7180000648342:114337-124015:1|gene:GMOY004931	45	159502	1	1	1	1	0.02
117	1	GMOY009228-PA	40S ribosomal protein S26e|protein_coding|scf7180000651823:6393-7308:-1|gene:GMOY009228	45	19473	1	1	1	1	0.17
118	1	GMOY011526-PA	Hemomucin|protein_coding|scf7180000652170:6601438-6604109:1|gene:GMOY011526	45	61953	1	1	1	1	0.05
119	1	GMOY010734-PA	Gamma interferon inducible thiol reductase|protein_coding|scf7180000652156:498693-505932:-1|gene:GMOY010734	44	41879	1	1	1	1	0.08
120	1	GMOY008573-PA	Diacetyl reductase / L xylulose reductase|protein_coding|scf7180000651425:49104-51080:-1|gene:GMOY008573	44	25778	1	1	1	1	0.13
121	1	GMOY001436-PA	Chytochrome C oxidase subunit 5b|protein_coding|scf7180000641386:56205-56815:-1|gene:GMOY001436	44	21125	2	2	2	2	0.34
122	1	GMOY000430-PA	Elongation factor 2|protein_coding|scf7180000639782:15281-18767:1|gene:GMOY000430	44	95569	1	1	1	1	0.03
123	1	GMOY003590-PA	Scavenger acceptor protein Class A member 5|protein_coding|scf7180000646704:2284-21224:1|gene:GMOY003590	43	233319	1	1	1	1	0.01
124	1	GMOY007145-PA	Ribosomal protein S14p / S29e|protein_coding|scf7180000650212:120851-121296:-1|gene:GMOY007145	43	15205	1	1	1	1	0.22
125	1	GMOY002867-PA	Glutaryl CoA dehydrogenase|protein_coding|scf7180000644679:82443-83796:1|gene:GMOY002867	43	46128	2	2	1	1	0.07
126	1	GMOY005546-PA	Adenosylhomocysteinase|protein_coding|scf7180000648635:95346-101722:-1|gene:GMOY005546	43	59413	2	2	1	1	0.11
127	1	GMOY003701-PA	D-3-phosphoglycerate|protein_coding|scf7180000646922:110072-122050:1|gene:GMOY003701	42	49798	1	1	1	1	0.07
128	1	GMOY011870-PA	Fructose biphosphate aldolase|protein_coding|scf7180000652170:21996157-22003018:-1|gene:GMOY011870	42	40009	1	1	1	1	0.08
129	1	GMOY007006-PA	mitochondrial oxoglutarate / malate carrier protein|protein_coding|scf7180000649861:11500-15008:-1|gene:GMOY007006	42	39474	1	1	1	1	0.08
130	1	GMOY009378-PA	Cytochrome p450|protein_coding|scf7180000651841:235606-243839:-1|gene:GMOY009378	42	72321	1	1	1	1	0.05
131	1	GMOY002418-PA	Isocitrate dehydrogenase α subunit|protein_coding|scf7180000643634:16342-17321:-1|gene:GMOY002418	41	29366	1	1	1	1	0.11
132	1	GMOY001946-PA	Aminopeptidase|protein_coding|scf7180000642467:87289-91839:1|gene:GMOY001946	41	54653	1	1	1	1	0.06
133	1	GMOY002617-PA	NADH dehydrogenase|protein_coding|scf7180000644097:59359-59814:1|gene:GMOY002617	41	17122	1	1	1	1	0.2
134	1	GMOY012313-PA	5' nucleotidase|protein_coding|scf7180000645625:66440-70495:1|gene:GMOY012313	41	62716	2	2	1	1	0.05
135	1	GMOY000195-PA	Serine carboxypeptidase S28|protein_coding|scf7180000639216:132863-134715:-1|gene:GMOY000195	41	59090	1	1	1	1	0.06
136	1	GMOY010661-PA	Poly-A binding protein|protein_coding|scf7180000652153:1438946-1462614:-1|gene:GMOY010661	41	275285	1	1	1	1	0.01
137	1	GMOY011410-PA	Secreted protein|protein_coding|scf7180000652170:3912466-3913911:1|gene:GMOY011410	41	25017	1	1	1	1	0.13
138	1	GMOY012179-PA	Acetyltransferase|protein_coding|scf7180000648022:91033-92262:1|gene:GMOY012179	41	44062	2	2	2	2	0.16
139	1	GMOY005442-PA	Lipophorin|protein_coding|scf7180000648591:115103-128414:-1|gene:GMOY005442	41	376404	1	1	1	1	0.01
140	1	GMOY004732-PA	Pyruvate carboxylase|protein_coding|scf7180000648211:41887-46294:1|gene:GMOY004732	41	82163	1	1	1	1	0.04
141	1	GMOY004379-PA	ATP synthase subunit b|protein_coding|scf7180000648077:42903-43953:-1|gene:GMOY004379	40	27104	1	1	1	1	0.12
142	1	GMOY009320-PA	Mitochondrial phosphate carrier protein|protein_coding|scf7180000651840:735755-748566:1|gene:GMOY009320	40	253195	1	1	1	1	0.01
143	1	GMOY003727-PA	Serine hydroxymethyltransferase|protein_coding|scf7180000646985:15273-19302:1|gene:GMOY003727	40	34298	1	1	1	1	0.1
144	1	GMOY009457-PA	Vacuolar H+ ATPase v1 sector subunit d|protein_coding|scf7180000651846:528202-532258:1|gene:GMOY009457	40	27716	1	1	1	1	0.12
145	1	GMOY000359-PA	Dihydrolipoamide|protein_coding|scf7180000639579:17244-19445:1|gene:GMOY000359	40	51432	1	1	1	1	0.06
146	1	GMOY011516-PA	Tyrosine phosphatase 1-like protein precursor|protein_coding|scf7180000652170:6455518-6469223:1|gene:GMOY011516	40	237831	1	1	1	1	0.01
147	1	GMOY004154-PA	UDP glucose pyrophosphorylase|protein_coding|scf7180000647982:162837-174036:1|gene:GMOY004154	39	58283	1	1	1	1	0.06
148	1	GMOY000391-PA	Sorting nexin 9|protein_coding|scf7180000639669:170855-175891:1|gene:GMOY000391	39	63775	1	1	1	1	0.05
149	1	GMOY008618-PA	Oligosaccharyltransferase 48kDa subunit β|protein_coding|scf7180000651455:343654-345139:1|gene:GMOY008618	39	54199	1	1	1	1	0.06
150	1	GMOY003996-PA	Protein of unknown function|protein_coding|scf7180000647876:46204-74747:1|gene:GMOY003996	39	34568	1	1	1	1	0.1
151	1	GMOY008665-PA	Progesterone receptor membrane component|protein_coding|scf7180000651494:133127-134900:1|gene:GMOY008665	39	25188	1	1	1	1	0.13
152	1	GMOY011690-PA	Conserved secreted protein|protein_coding|scf7180000652170:13184908-13191707:-1|gene:GMOY011690	39	77857	1	1	1	1	0.04
153	1	GMOY006255-PA	Ribosomal protein L4|protein_coding|scf7180000648916:54695-56405:-1|gene:GMOY006255	38	46363	1	1	1	1	0.07
154	1	GMOY004375-PA	HSP 90|protein_coding|scf7180000648077:25349-27499:1|gene:GMOY004375	38	82305	3	3	2	2	0.08
155	1	GMOY010369-PA	Glycosyl transferase family 2|protein_coding|scf7180000652137:5397-8439:-1|gene:GMOY010369	38	69136	1	1	1	1	0.05
156	1	GMOY000701-PA	NADH ubiquinone oxidoreductase|protein_coding|scf7180000640296:63697-64703:1|gene:GMOY000701	38	24792	1	1	1	1	0.14
157	1	GMOY004937-PA	Short chain acyl CoA dehydrogenase|protein_coding|scf7180000648342:175016-186574:-1|gene:GMOY004937	37	46340	1	1	1	1	0.07
158	1	GMOY008738-PA	Ubiquinol cytochrome 3|protein_coding|scf7180000651516:84649-103389:1|gene:GMOY008738	37	104738	1	1	1	1	0.03
159	1	GMOY006978-PA	Plasma membrane glycoprotein CD36|protein_coding|scf7180000649782:11756-13500:-1|gene:GMOY006978	37	54316	1	1	1	1	0.06
160	1	GMOY008340-PA	C-type lectin|protein_coding|scf7180000651142:9661-19215:-1|gene:GMOY008340	37	27410	1	1	1	1	0.12
161	1	GMOY004639-PA	Calponin|protein_coding|scf7180000648171:62949-64058:1|gene:GMOY004639	37	42520	1	1	1	1	0.08
162	1	GMOY010526-PA	Sodium-solute symporter|protein_coding|scf7180000652149:693773-725214:-1|gene:GMOY010526	37	165041	1	1	1	1	0.02
163	1	GMOY008583-PA	Ribosomal protein S15Aa|protein_coding|scf7180000651435:5810-6208:1|gene:GMOY008583	36	15203	1	1	1	1	0.22
164	1	GMOY006294-PA	gamma glutamyl phosphate reductase|protein_coding|scf7180000648948:31720-79429:-1|gene:GMOY006294	36	82824	1	1	1	1	0.04
165	1	GMOY010280-PA	Protein of unknown function|protein_coding|scf7180000652113:112337-122110:-1|gene:GMOY010280	36	152923	1	1	1	1	0.02
166	1	GMOY007570-PA	Peroxiredoxin 6005|protein_coding|scf7180000650503:17813-19537:1|gene:GMOY007570	36	29714	1	1	1	1	0.12
167	1	GMOY011014-PA	Secreted phosphatidylethanolamine binding protein|protein_coding|scf7180000652159:1018271-1019242:-1|gene:GMOY011014	36	35995	1	1	1	1	0.09
168	1	GMOY001323-PA	Peroxiredoxin|protein_coding|scf7180000641282:5518-6419:1|gene:GMOY001323	36	19831	1	1	1	1	0.17
169	1	GMOY011652-PA	NAD dependent malate dehydrogenase|protein_coding|scf7180000652170:11285211-11287331:1|gene:GMOY011652	36	35702	1	1	1	1	0.09
170	1	GMOY008106-PA	Farnesoic acid O-methyl transferase|protein_coding|scf7180000650913:57984-67973:1|gene:GMOY008106	36	50200	1	1	1	1	0.07
171	1	GMOY000816-PA	NADH-ubiquitone oxidoreductase NDUF S3|protein_coding|scf7180000640488:9744-11238:1|gene:GMOY000816	35	30247	3	3	2	2	0.23
172	1	GMOY003934-PA	Aconitase|protein_coding|scf7180000647834:2837-7518:-1|gene:GMOY003934	35	100155	1	1	1	1	0.03
173	1	GMOY009534-PA	Gonadal Ca2+ binding protein regucalcin SMP30|protein_coding|scf7180000651846:1821648-1823052:-1|gene:GMOY009534	35	42294	1	1	1	1	0.08
174	1	GMOY012116-PA	Yellow f|protein_coding|scf7180000646922:69194-72258:-1|gene:GMOY012116	35	51050	1	1	1	1	0.07
175	1	GMOY000582-PA	FOF 1 type ATP sythase gamma subunit|protein_coding|scf7180000640123:100992-102814:1|gene:GMOY000582	34	37886	1	1	1	1	0.09
176	1	GMOY011663-PA	Ribosomal protein L35A|protein_coding|scf7180000652170:11567552-11578667:-1|gene:GMOY011663	34	23449	1	1	1	1	0.14
177	1	GMOY008668-PA	Mitochondrial processing peptidase α subunit|protein_coding|scf7180000651496:45938-47894:-1|gene:GMOY008668	34	60990	1	1	1	1	0.05
178	1	GMOY009189-PA	Farnesyltransferase α subunit|protein_coding|scf7180000651788:69310-75029:-1|gene:GMOY009189	34	45572	1	1	1	1	0.07
179	1	GMOY006986-PA	Protein of unknown function|protein_coding|scf7180000649829:28014-31770:1|gene:GMOY006986	34	35345	1	1	1	1	0.1
180	1	GMOY008463-PA	Glycoside hydrolase family|protein_coding|scf7180000651334:79177-86109:1|gene:GMOY008463	34	105563	1	1	1	1	0.03
181	1	GMOY000405-PA	Protein of unknown function|protein_coding|scf7180000639690:109896-110381:1|gene:GMOY000405	33	14411	1	1	1	1	0.24
182	1	GMOY004361-PA	Glutathione S-transferase|protein_coding|scf7180000648063:69317-115268:-1|gene:GMOY004361	33	92063	1	1	1	1	0.04
183	1	GMOY002531-PA	Protein of unknown function|protein_coding|scf7180000643919:113081-126728:-1|gene:GMOY002531	32	501664	1	1	1	1	0.01
184	1	GMOY007191-PA	GmmPer108|protein_coding|scf7180000650239:63083-66269:1|gene:GMOY007191	32	109968	1	1	1	1	0.03
185	1	GMOY007077-PA	Secreted peptide|protein_coding|scf7180000650090:12913-13470:1|gene:GMOY007077	32	15673	1	1	1	1	0.22
186	1	GMOY007910-PA	Succinyl CoA synthetase|protein_coding|scf7180000650717:22174-31310:1|gene:GMOY007910	32	103638	1	1	1	1	0.03
187	1	GMOY007353-PA	Glutamate dehydrogenase|protein_coding|scf7180000650305:30603-33421:-1|gene:GMOY007353	32	43357	1	1	1	1	0.08
188	1	GMOY010303-PA	Kazal type serine protease inhibitor|protein_coding|scf7180000652121:423-1008:-1|gene:GMOY010303	32	8480	1	1	1	1	0.42
189	1	GMOY001805-PA	Isocitrate dehydrogenase|protein_coding|scf7180000642139:70922-76884:1|gene:GMOY001805	32	45892	1	1	1	1	0.07
190	1	GMOY002541-PA	Protein of unknown function|protein_coding|scf7180000643919:164391-167324:-1|gene:GMOY002541	32	92967	2	2	1	1	0.04
191	1	GMOY008286-PA	Thiamine pyrophosphate enzyme|protein_coding|scf7180000651113:19218-21520:1|gene:GMOY008286	32	64293	1	1	1	1	0.05
192	1	GMOY008627-PA	Protein of unknown function|protein_coding|scf7180000651460:317-1373:-1|gene:GMOY008627	32	21993	1	1	1	1	0.15
193	1	GMOY004246-PA	Zinc carboxypeptidase|protein_coding|scf7180000648009:261016-262479:1|gene:GMOY004246	31	46994	1	1	1	1	0.07
194	1	GMOY009375-PA	Chitin deacetylase|protein_coding|scf7180000651840:1672676-1673975:-1|gene:GMOY009375	30	45473	1	1	1	1	0.07
195	1	GMOY010455-PA	Protein of unknown function|protein_coding|scf7180000652144:132761-148324:-1|gene:GMOY010455	30	91253	1	1	1	1	0.04

## Sheet: InGel band 1-30 Protein summary
Band #	Accession	Protein score	Description	# peptides	Protein Coverage	emPAI	Column1
1	GMOY002708	279	GmmPer66	3	0.068	0.17
	GMOY009892	36	Dynein AAA+ ATPase	1	0.003	0.01
2			NO SIGNIFICANT HITS
3	GMOY002708	38	GmmPer66	1	0.02	0.05
	GMOY009892	37	Dynein AAA+ ATPase	1	0.003	0.01
4	GMOY011773	98	Perlecan	1	0.002	0.01
5			NO SIGNIFICANT HITS
6	GMOY001776	99	Actin	2	0.056	0.19
	GMOY001773	68	Perlecan	1	0.003	0.01
7	GMOY003590	61	Collagen type IV	1	0.006	0.02
	GMOY011773	60	Perlecan	1	0.002	0.01
8	GMOY005703	748	Myosin heavy chain	13	0.063	0.19
	GMOY007523	202	Collagen alpha-1 (IV)	2	0.014	0.07
	GMOY011773	53	Perlecan	1	0.002	0.01
	GMOY009892	33	Dynein AAA+ ATPase	1	0.003	0.01
9	GMOY005703	421	Myosin heavy chain	7	0.025	0.1
	GMOY007523	107	Collagen alpha-1 (IV)	1	0.009	0.02
	GMOY003579	73	Sodium/potassium transporting ATPase	1	0.012	0.04
	GMOY011773	70	Perlecan	2	0.004	0.01
	GMOY009892	37	Dynein AAA+ ATPase	1	0.003	0.01
10	GMOY005703	247	Myosin heavy chain	4	0.015	0.06
	GMOY011773	35	Perlecan	1	0.002	0.01
11	GMOY005703	342	Myosin heavy chain	5	0.02	0.07
	GMOY011773	79	Perlecan	2	0.004	0.01
	GMOY004732	42	Acetyl CoA pyruvate carboxylase	1	0.014	0.05
	GMOY009248	30	Lamin	1	0.016	0.05
12	GMOY003759	275	Sodium/potassium transporting ATPase	4	0.058	0.16
	GMOY002708	157	GmmPer66	2	0.048	0.11
	GMOY005703	118	Myosin heavy chain	2	0.007	0.03
	GMOY011773	115	Perlecan	3	0.006	0.02
	GMOY011520	112	Alanyl aminopeptidase M1	3	0.019	0.05
	GMOY006600	103	ATP-citrate synthase	1	0.005	0.01
	GMOY009300	70	Glutamyl aminopeptidase	1	0.004	0.01
	GMOY001369	67	Ubiquitin activating enzyme E1	1	0.012	0.03
	GMOY009892	50	Dynein AAA+ ATPase	1	0.003	0.01
	GMOY007294	45	2-oxoglutarate dehydrogenase	1	0.009	0.03
13	GMOY002377	518	Paramyosin	10	0.091	0.33
	GMOY003579	274	Sodium/potassium transporting ATPase	3	0.039	0.12
	GMOY007294	193	2-oxoglutarate dehydrogenase	3	0.026	0.09
	GMOY011520	141	Alanyl aminopeptidase M1	3	0.019	0.05
	GMOY003173	92	Cathepsin B	2	0.028	0.09
	GMOY005703	91	Myosin heavy chain	2	0.008	0.03
	GMOY011773	79	Perlecan	2	0.004	0.01
	GMOY004419	78	Ebna-2 binding protein	2	0.02	0.07
	GMOY009685	70	Vinculin	1	0.01	0.03
	GMOY001722	58	Myosin 1B	1	0.01	0.03
	GMOY001277	48	Midline fasciclin	1	0.012	0.04
	GMOY009892	46	Dynein AAA+ ATPase	1	0.0032	0.01
	GMOY006959	39	Carboxlyesterase	1	0.024	0.06
	GMOY010537	32	Double stranded binding protein	1	0.01	0.05
14	GMOY012011	176	Hexamerin 2	4	0.035	0.15
	GMOY006372	172	Endoplasmin	1	0.017	0.04
	GMOY003579	156	Sodium/potassium transporting ATPase	3	0.039	0.12
	GMOY005703	153	Myosin heavy chain	4	0.013	0.06
	GMOY011773	106	Perlecan	3	0.006	0.02
	GMOY000430	88	Translation elongation factor	2	0.026	0.08
	GMOY006294	73	Glutamate semialdehyde dehydrogenase	2	0.029	0.09
	GMOY007820	52	puromycin-sensitive aminopeptidase	1	0.01	0.03
	GMOY002377	44	Paramyosin	1	0.01	0.03
	GMOY009892	44	Dynein AAA+ ATPase	1	0.003	0.01
	GMOY006871	34	Dipeptidyl-peptidase	1	0.018	0.05
	GMOY002227	34	Uncharacterised/conserved/hypothetical	1	0.019	0.06
15	GMOY004743	239	3-hydroxyacyl-coa dehyrogenase	3	0.039	0.14
	GMOY003216	209	Heat shock protein HSP-70	2	0.033	0.16
	GMOY006294	177	Glutamate semialdehyde dehydrogenase	3	0.05	0.14
	GMOY004375	145	Heat shock protein HSP-83	3	0.05	0.14
	GMOY012139	124	Heat shock protein HSP-90	2	0.041	0.14
	GMOY003934	108	Aconitase hydratase	3	0.039	0.11
	GMOY005703	102	Myosin heavy chain	2	0.007	0.03
	GMOY009071	101	Protein transport protein (Sec23)	1	0.021	0.04
	GMOY005958	72	Prolyl endopeptidase (prolyl oligopeptidase)	1	0.016	0.04
	GMOY008757	67	Uncharacterised/conserved/hypothetical	2	0.013	0.04
	GMOY011773	62	Perlecan	1	0.002	0.01
	GMOY012011	58	Hexamerin 2	1	0.01	0.04
	GMOY011587	39	Uncharacterised/conserved/hypothetical	1	0.014	0.04
16	GMOY003765	139	Moesin/ezrin/radixin	1	0.017	0.11
	GMOY009723	132	Angiotensin converting enzyme	2	0.012	0.03
	GMOY012049	121	Hsc70-interacting protein	1	0.02	0.05
	GMOY009493	105	Heat shock protein HSP-70	1	0.02	0.05
	GMOY009357	97	Succinate dehydrogenase	1	0.039	0.12
	GMOY000743	76	V-type proton ATPase catalytic subunit A (V-ATPase subunit A)	1	0.024	0.05
	GMOY005703	67	Myosin heavy chain	2	0.008	0.03
	GMOY004228	63	Transferrin	1	0.018	0.05
	GMOY011691	63	NADH-ubiquinone oxidoreductase	1	0.012	0.04
	GMOY005442	55	Lipophorin	1	0.005	0.01
	GMOY009248	44	Lamin	1	0.016	0.05
	GMOY006294	40	Glutamate semialdehyde dehydrogenase	1	0.013	0.04
	GMOY011805	30	Choline o-acyltransferase	1	0.011	0.04
	GMOY002708	30	GmmPer66	1	0.02	0.05
17	GMOY007524	46	Uncharacterised/conserved/hypothetical	1	0.021	0.06
	GMOY002421	44	Chaperonin-60kD, ch60	1	0.03	0.06
	GMOY001034	30	multiple epidermal growth factor-like domains protein 8	1	0.003	0.01
18	GMOY008378	194	Glutamate dehydrogenase	1	0.2	1.55
	GMOY002421	119	Chaperonin-60kD, ch60	2	0.046	0.13
	GMOY006640	71	Chaperonin-60kD, ch60	1	0.016	0.06
	GMOY006959	63	Carboxlyesterase	1	0.024	0.09
	GMOY007353	60	Glutamate dehydrogenase	1	0.049	0.05
	GMOY002708	40	GmmPer66	1	0.02	0.02
	GMOY009723	38	Angiotensin converting enzyme	1	0.006	0.04
	GMOY004611	36	Vesicular transport factor dp115	1	0.011	0.02
	GMOY002973	35	Salivary gland growth factor - 1	1	0.006	0.45
	GMOY005110	33	Glucose-6-phosphate isomerase	1	0.139	0.01
	GMOY003671	32	Uncharacterised/conserved/hypothetical	1	0.002	0.05
19	GMOY001525	1212	ATP synthase beta subunit	7	0.211	1.88
	GMOY007817	141	ATP synthase beta subunit	1	0.026	0.1
	GMOY008764	703	ATP synthase beta subunit	10	0.201	1.2
	GMOY001949	61	ATP synthase alpha subunit	2	0.017	0.09
	GMOY002029	286	ATP synthase beta subunit	3	0.074	0.3
	GMOY012131	217	Aldehyde dehydrogenase	3	0.062	0.2
	GMOY000176	183	Tubulin	3	0.046	0.16
	GMOY000148	149	Tubulin	2	0.056	0.16
	GMOY000119	72	Tubulin	2	0.056	0.16
	GMOY011788	73	Tubulin	2	0.015	0.16
	GMOY009393	40	Tubulin	1	0.023	0.16
	GMOY002613	166	Tubulin	2	0.064	0.15
	GMOY007063	160	Midgut trypsin	1	0.058	0.29
	GMOY000153	139	Chitinase Chit1 precursor	1	0.017	0.04
	GMOY006294	61	Gamma-glutamyl phosphate reductase	1	0.013	0.04
	GMOY002358	47	80 kDa nuclear cap-binding protein	1	0.009	0.04
	GMOY001198	33	Uncharacterised/conserved/hypothetical	1	0.002	0.01
20	GMOY003481	253	Mitochondrial processing peptidase beta subunit	5	0.141	0.62
	GMOY000148	135	Tubulin	1	0.034	0.07
	GMOY001525	126	ATP synthase beta subunit	1	0.053	0.14
	GMOY007817	80	ATP synthase beta subunit	1	0.028	0.14
	GMOY002708	121	GmmPer66	2	0.04	0.11
	GMOY010555	110	Prolylcarboxypeptidase	2	0.099	0.14
	GMOY005872	108	NADH-ubiquinone oxidoreductase fe-s protein 2	1	0.052	0.07
	GMOY002199	100	Translation elongation factor EF-1 alpha/Tu	1	0.024	0.07
	GMOY001831	84	Bleomycin hydrolase	1	0.029	0.05
	GMOY005793	79	Aspartate ammonia lyase	1	0.028	0.07
	GMOY001776	53	Actin	1	0.029	0.09
	GMOY008484	42	cAMP-dependent protein kinase type ii regulatory subunit	2	0.032	0.22
	GMOY009892	42	Dynein AAA+ ATPase	1	0.011	0.01
	GMOY005026	40	Dynein AAA+ ATPase	0	0.004	0.01
	GMOY001824	36	NADH-ubiquinone oxidoreductase flavoprotein 1	1	0.049	0.07
	GMOY007398	33	Small GTPase	1	0.018	0.09
	GMOY008764	33	ATP synthase beta subunit	1	0.033	0.06
	GMOY007524	31	Uncharacterised/conserved/hypothetical	1	0.021	0.06
	GMOY011805	30	Choline o-acyltransferase	1	0.011	0.04
21	GMOY002708	137	GmmPer66	1	0.02	0.05
	GMOY006991	94	Tubulointerstitial nephritis antigen	2	0.046	0.24
	GMOY003513	89	Citrate synthase 1	1	0.03	0.07
	GMOY004931	71	NADP-dependent isocitrate dehydrogenase	1	0.006	0.02
	GMOY003390	55	NADH-ubiquinone oxidoreductase NDUFA10/42kDa subunit	2	0.048	0.17
	GMOY003287	49	Initiation factor 4a	1	0.019	0.06
	GMOY000153	46	Chitinase Chit1 precursor	1	0.013	0.04
	GMOY001776	46	Actin	1	0.029	0.09
	GMOY009892	41	Dynein AAA+ ATPase	1	0.003	0.01
	GMOY000849	40	Uncharacterised/conserved/hypothetical	1	0.009	0.03
	GMOY003934	37	Aconitase	1	0.013	0.04
	GMOY010103	30	Aspartyl protease	1	0.018	0.09
22	GMOY003315	964	Actin 87e	9	0.287	1.78
	GMOY001776	890	Actin	8	0.253	1.78
	GMOY007085	900	Actin 5c	8	0.226	1.09
	GMOY007620	189	NADH-ubiquinone oxidoreductase	2	0.048	0.15
	GMOY007118	100	NADH-ubiquinone oxidoreductase	1	0.024	0.15
	GMOY000153	160	Chitinase Chit1 precursor	2	0.03	0.08
	GMOY002708	116	GmmPer66	2	0.04	0.11
	GMOY003176	100	Myofilin	1	0.033	0.09
	GMOY002792	95	Acetyl-CoA acyltransferase 2	2	0.044	0.16
	GMOY008764	83	ATP synthase alpha subunit	1	0.029	0.06
	GMOY001238	45	Gelsolin	1	0.01	0.04
	GMOY002867	42	Glutaryl-CoA dehydrogenase	2	0.048	0.17
	GMOY006490	40	Ionotropic glutamate receptor	1	0.009	0.03
	GMOY009892	38	Dynein AAA+ ATPase	1	0.003	0.01
	GMOY003929	30	Uncharacterised/conserved/hypothetical	1	0.011	0.03
23	GMOY002708	209	GmmPer66	2	0.048	0.11
	GMOY001776	153	Actin	2	0.056	0.19
	GMOY011652	124	NAD-dependent malate dehydrogenase	2	0.068	0.22
	GMOY003176	120	Uncharacterised/conserved/hypothetical	2	0.07	0.19
	GMOY000473	115	Glyceraldehyde-3-phosphate dehydrogenase	1	0.042	0.1
	GMOY003306	103	TsetseEP	1	0.035	0.11
	GMOY001525	80	ATP synthase beta subunit	1	0.037	0.07
	GMOY008627	64	Uncharacterised/conserved/hypothetical	1	0.054	0.17
	GMOY002443	57	Serpin 2	1	0.028	0.06
	GMOY009603	54	Aldehyde reductase	1	0.016	0.04
	GMOY002110	46	Aldehyde reductase	1	0.039	0.12
	GMOY009892	40	Dynein AAA+ ATPase	1	0.003	0.01
	GMOY007736	32	Arginine kinase	1	0.0155	0.03
24	GMOY009756	286	Trypsin/PRO3	5	0.061	0.28
	GMOY011652	157	NAD-dependent malate dehydrogenase	3	0.089	0.35
	GMOY002634	120	Pyrroline-5-carboxylate reductase	1	0.048	0.13
	GMOY001776	104	Actin	1	0.027	0.09
	GMOY011773	92	Perlecan	1	0.002	0.01
	GMOY004246	78	Zinc carboxypeptidase	1	0.022	0.08
	GMOY003306	77	TsetseEP	1	0.048	0.11
	GMOY001525	77	ATP synthase beta subunit	1	0.028	0.07
	GMOY011932	68	Glycosyltransferase	1	0.016	0.04
	GMOY000582	61	ATP synthase gamma subunit	1	0.036	0.1
	GMOY008764	59	ATP synthase alpha subunit	1	0.029	0.06
	GMOY000672	51	Serine protease 6	1	0.049	0.12
	GMOY002708	48	GmmPer66	1	0.02	0.05
	GMOY007063	47	Midgut trypsin	1	0.035	0.14
	GMOY009531	45	Uncharacterised/conserved/hypothetical	1	0.029	0.07
	GMOY008627	41	Uncharacterised/conserved/hypothetical	1	0.054	0.17
	GMOY009892	34	Dynein AAA+ ATPase	1	0.003	0.01
	GMOY009575	34	Annexin x	1	0.028	0.11
	GMOY009975	34	Annexin	1	0.031	0.1
	GMOY005442	33	Lipophorin	1	0.003	0.01
	GMOY009145	33	Prohibitin-like protein	1	0.021	0.1
	GMOY011410	31	Secreted protein	1	0.031	0.15
25	GMOY008707	302	Uncharacterised/conserved/hypothetical	3	0.068	0.33
	GMOY002634	265	Pyrroline-5-carboxylate reductase	2	0.099	0.45
	GMOY009756	236	Trypsin/PRO3	3	0.037	0.18
	GMOY006034	204	ADP/ATP carrier protein	7	0.2	1.06
	GMOY010142	151	Serine protease	1	0.049	0.11
	GMOY001776	150	Actin	2	0.056	0.19
	GMOY006173	136	14-3-3 protein zeta	2	0.101	0.29
	GMOY007699	124	40S ribosomal protein S3	1	0.045	0.11
	GMOY011657	100	14-3-3 protein	1	0.043	0.13
	GMOY000582	83	ATP synthase gamma subunit	2	0.065	0.33
	GMOY010218	72	Ribosomal protein L7	2	0.082	0.27
	GMOY000508	76	Phosphate carrier protein	1	0.034	0.1
	GMOY005492	55	Prohibitin	1	0.029	0.12
	GMOY007346	51	Electron transfer flavoprotein beta subunit	1	0.047	0.14
	GMOY009757	48	Serine type endopeptidase	1	0.036	0.12
	GMOY001290	45	Proteasome alpha subunit	1	0.036	0.13
	GMOY002729	40	Serine protease 1	1	0.008	0.03
	GMOY007063	40	Midgut trypsin	1	0.035	0.14
	GMOY000234	37	Acyl-CoA synthetase	1	0.011	0.04
	GMOY003090	35	Voltage-dependent anion-selective channel	1	0.035	0.12
	GMOY005442	33	Lipophorin	1	0.003	0.01
26	GMOY006839	245	Porin	3	0.237	0.8
	GMOY011770	226	Hydroxyacyl dehydrogenase	1	0.067	0.3
	GMOY007063	162	Midgut trypsin	2	0.078	0.29
	GMOY001776	129	Actin	2	0.085	0.19
	GMOY009757	123	Serine type endopeptidase	2	0.072	0.26
	GMOY007346	104	Electron transfer flavoprotein beta subunit	2	0.107	0.3
	GMOY011979	95	Vacuolar H+-ATPase v1 sector subunit E	2	0.119	0.31
	GMOY010142	94	Midgut trypsin	1	0.049	0.11
	GMOY007954	88	Phosphoglycerate mutase	1	0.036	0.11
	GMOY001901	86	Fibrinogen-related/angiopoietin-like protein	2	0.06	0.2
	GMOY000701	85	NADH:ubiquinone reductase	1	0.056	0.15
	GMOY000816	78	NADH dehydrogenase iron-sulfur protein 3	2	0.123	0.27
	GMOY002708	63	GmmPer66	1	0.02	0.05
	GMOY009373	56	Glutathione S transferase S1	1	0.098	0.14
	GMOY002950	52	Antigen-5 precursor	1	0.042	0.13
	GMOY009756	50	Trypsin/PRO3	1	0.011	0.04
	GMOY011554	50	Myosin light chain 2	1	0.104	0.14
	GMOY003176	48	Myofilin	1	0.033	0.09
	GMOY003678	43	Proteasome alpha subunit	1	0.041	0.14
	GMOY003659	39	Succinate dehydrogenase	2	0.105	0.22
	GMOY012309	38	Lethal 2 essential for life/Hsp 20	1	0.084	0.25
	GMOY009892	35	Dynein AAA+ ATPase	1	0.014	0.01
	GMOY004379	32	ATP synthase subunit b	1	0.106	0.14
	GMOY011805	32	Choline o-acyltransferase	1	0.011	0.04
27	GMOY007063	690	Midgut trypsin	7	0.236	3.07
	GMOY006839	157	Porin	2	0.08	0.42
	GMOY001776	97	Actin	1	0.027	0.09
	GMOY004379	40	ATP synthase subunit b	1	0.038	0.14
	GMOY004187	39	Uncharacterised/conserved/hypothetical	1	0.01	0.05
	GMOY006034	39	ADP/ATP carrier protein	1	0.025	0.11
	GMOY007742	35	Uncharacterised/conserved/hypothetical	1	0.003	0.01
	GMOY011805	30	Choline o-acyltransferase	1	0.011	0.04
28	GMOY007063	327	Midgut trypsin	5	0.19	1.44
	GMOY001195	321	Uncharacterised/conserved/hypothetical	4	0.205	0.99
	GMOY008040	143	Thioredoxin	3	0.17	0.61
	GMOY002708	79	GmmPer66	1	0.02	0.05
	GMOY009756	79	Trypsin/PRO3	1	0.018	0.04
	GMOY000672	60	Serine protease 6	1	0.049	0.12
	GMOY007847	41	Uncharacterised/conserved/hypothetical	1	0.049	0.17
	GMOY011805	39	Choline o-acyltransferase	1	0.011	0.04
	GMOY005801	35	Microtubule associated protein xmap215	1	0.004	0.02
29	GMOY009744	251	Uncharacterised/conserved/hypothetical	3	0.15	0.5
	GMOY002708	194	GmmPer66	3	0.068	0.17
	GMOY010278	130	Cyclophilin type peptidyl-prolyl cis-trans isomerase	1	0.048	0.1
	GMOY000466	124	C-type lectin	1	0.053	0.13
	GMOY007063	122	Midgut trypsin	1	0.035	0.14
	GMOY009587	107	PRO2	1	0.095	0.29
	GMOY011263	51	Lethal 2 35Di/Hsp 20	1	0.099	0.21
	GMOY005682	48	Myosin light chain	1	0.058	0.22
	GMOY007847	36	Uncharacterised/conserved/hypothetical	1	0.049	0.17
	GMOY003850	32	ADP ribosylation factor 79F	1	0.055	0.18
30	GMOY000747	240	Nucleoside diphosphate kinase	2	0.126	0.6
	GMOY010846	169	40S ribosomal protein S23	1	0.14	0.24
	GMOY002708	100	GmmPer66	2	0.04	0.11
	GMOY010278	97	Cyclophilin type peptidyl-prolyl cis-trans isomerase	1	0.042	0.1
	GMOY007063	95	Midgut trypsin	1	0.035	0.14
	GMOY009587	56	PRO2	1	0.095	0.29
	GMOY008757	51	Uncharacterised/conserved/hypothetical	1	0.015	0.02
	GMOY011263	49	Lethal 2 35Di/Hsp 20	1	0.099	0.21
	GMOY002617	47	Uncharacterised/conserved/hypothetical	1	0.046	0.23
	GMOY004802	36	Uncharacterised/conserved/hypothetical	1	0.099	0.24
	GMOY011805	30	Choline o-acyltransferase	1	0.011	0.04

## Sheet: In Gel band 1 MASCOT output
Header	--------------------------------------------------------
Search title	in_gel_1_glossina_28/05/13
Timestamp	2013-05-28T11:36:00Z
User	Clair
Email	c.rose@liv.ac.uk
Report URI	http://lstmmaldi.liv.ac.uk/mascot/cgi/master_results.pl?file=../data/20130528/F001970.dat
Peak list data path	ingel1merge.mgf
Peak list format	Mascot generic
Search type	MIS
Mascot version	2.4.1
Database	140513_glossina
Fasta file	140513_glossina_.fasta
Total sequences	12457
Total residues	6887013
Sequences after taxonomy filter	12457
Number of queries	1592
Decoy	--------------------------------------------------------
Number of matches above identity threshold in search of real database	11
Number of matches above identity threshold in search of decoy database	5
Number of matches above homology threshold in search of real database	18
Number of matches above homology threshold in search of decoy database	6
Fixed modifications	--------------------------------------------------------
Identifier	Name	Delta	Neutral loss
1	Carbamidomethyl (C)	57.0215
Variable modifications	--------------------------------------------------------
Identifier	Name	Delta	Neutral loss(es)
1	Oxidation (M)	15.9949	0	63.9983
Search Parameters	--------------------------------------------------------
Taxonomy filter	All entries
Enzyme	Trypsin
Maximum Missed Cleavages	1
Fixed modifications	Carbamidomethyl (C)
Quantitation method	None
Variable modifications	Oxidation (M)
Peptide Mass Tolerance	0.6
Peptide Mass Tolerance Units	Da
Fragment Mass Tolerance	0.6
Fragment Mass Tolerance Units	Da
Mass values	Monoisotopic
Instrument type	ESI-TRAP
Isotope error mode	0
Decoy database also searched	1
Format parameters	--------------------------------------------------------
Significance threshold	0.05
Max. number of hits	0
Use MudPIT protein scoring	1
Ions score cut-off	0
Include same-set proteins	0
Include sub-set proteins	1
Include unassigned	0
Require bold red	0
Use homology threshold	1
Group protein families	1
Re-score using Percolator	0
Protein hits	--------------------------------------------------------
prot_hit_num	prot_family_member	prot_acc	prot_desc	prot_score	prot_mass	prot_matches	prot_matches_sig	prot_sequences	prot_sequences_sig	pep_query	pep_rank	pep_isbold	pep_isunique	pep_exp_mz	pep_exp_mr	pep_exp_z	pep_calc_mr	pep_delta	pep_miss	pep_score	pep_expect	pep_res_before	pep_seq	pep_res_after	pep_var_mod	pep_var_mod_pos	pep_summed_mod_pos	pep_scan_title
1	1	GMOY002708-PA	hypothetical protein|protein_coding|scf7180000644279:138091-144189:-1|gene:GMOY002708	279	67871	8	7	3	3	1061	1	1	1	733.38	1464.75	2	1464.65	0.1001	0	43.34	0.0012	R	CPLGQWYDGDVR	S				Rodrigo_ingel_1.1344.1344.2.dta
1	1	GMOY002708-PA	hypothetical protein|protein_coding|scf7180000644279:138091-144189:-1|gene:GMOY002708	279	67871	8	7	3	3	1090	1	1	1	748.323	1494.63	2	1494.66	-0.0255	0	43.59	0.0013	R	CPLGQWYDSDVR	L				Rodrigo_ingel_1.1426.1426.2.dta
1	1	GMOY002708-PA	hypothetical protein|protein_coding|scf7180000644279:138091-144189:-1|gene:GMOY002708	279	67871	8	7	3	3	1091	1	1	1	748.341	1494.67	2	1494.66	0.0106	0	45.41	0.00037	R	CPLGQWYDSDVR	L				Rodrigo_ingel_1.1300.1300.2.dta
1	1	GMOY002708-PA	hypothetical protein|protein_coding|scf7180000644279:138091-144189:-1|gene:GMOY002708	279	67871	8	7	3	3	1092	1	1	1	748.36	1494.71	2	1494.66	0.0495	0	53.72	0.00011	R	CPLGQWYDSDVR	L				Rodrigo_ingel_1.1323.1323.2.dta
1	1	GMOY002708-PA	hypothetical protein|protein_coding|scf7180000644279:138091-144189:-1|gene:GMOY002708	279	67871	8	7	3	3	1093	1	1	1	748.361	1494.71	2	1494.66	0.0505	0	48.23	0.0003	R	CPLGQWYDSDVR	L				Rodrigo_ingel_1.1368.1368.2.dta
1	1	GMOY002708-PA	hypothetical protein|protein_coding|scf7180000644279:138091-144189:-1|gene:GMOY002708	279	67871	8	7	3	3	1094	1	1	1	748.634	1495.25	2	1494.66	0.5966	0	22.23	0.13	R	CPLGQWYDSDVR	L				Rodrigo_ingel_1.1802.1802.2.dta
1	1	GMOY002708-PA	hypothetical protein|protein_coding|scf7180000644279:138091-144189:-1|gene:GMOY002708	279	67871	8	7	3	3	1258	1	1	1	919.899	1837.78	2	1837.87	-0.089	0	99.27	2.6e-09	R	SSDCSSLTDGTILLDVR	H				Rodrigo_ingel_1.1587.1587.2.dta
1	1	GMOY002708-PA	hypothetical protein|protein_coding|scf7180000644279:138091-144189:-1|gene:GMOY002708	279	67871	8	7	3	3	1259	1	1	1	919.941	1837.87	2	1837.87	-0.005	0	101.62	1.5e-09	R	SSDCSSLTDGTILLDVR	H				Rodrigo_ingel_1.1582.1582.2.dta	emPAI	0.17
2	1	GMOY009892-PA	hypothetical protein|protein_coding|scf7180000651939:4969-13729:-1|gene:GMOY009892	36	315004	3	1	3	1	755	1	1	1	515.283	1028.55	2	1028.59	-0.0359	0	35.5	0.01	K	DELVLTIAR	N				Rodrigo_ingel_1.1277.1277.2.dta
2	1	GMOY009892-PA	hypothetical protein|protein_coding|scf7180000651939:4969-13729:-1|gene:GMOY009892	36	315004	3	1	3	1	771	3	1	1	523.078	1044.14	2	1043.6	0.5432	0	2.36	1	K	ILTLVNSER	I				Rodrigo_ingel_1.2359.2359.2.dta
2	1	GMOY009892-PA	hypothetical protein|protein_coding|scf7180000651939:4969-13729:-1|gene:GMOY009892	36	315004	3	1	3	1	1475	6	1	1	643.699	2570.77	4	2571.36	-0.5907	1	2.13	1.7	R	NYVTSLNYLQLVSGFKELLENK	R				Rodrigo_ingel_1.173.173.4.dta	emPAI	0.01
3	1	GMOY009248-PA	hypothetical protein|protein_coding|scf7180000651825:69055-72933:-1|gene:GMOY009248	31	70982	2	1	1	1	799	1	1	1	533.26	1064.5	2	1064.56	-0.0527	1	30.73	0.028	R	STLSTGRTSR	S				Rodrigo_ingel_1.724.724.2.dta
3	1	GMOY009248-PA	hypothetical protein|protein_coding|scf7180000651825:69055-72933:-1|gene:GMOY009248	31	70982	2	1	1	1	800	2	1	1	533.261	1064.51	2	1064.56	-0.0507	1	26.76	0.07	R	STLSTGRTSR	S				Rodrigo_ingel_1.717.717.2.dta	emPAI	0.05
4	1	GMOY011805-PA	hypothetical protein|protein_coding|scf7180000652170:20358997-20369920:-1|gene:GMOY011805	30	95234	1	1	1	1	885	1	1	1	584.799	1167.58	2	1167.58	0.0047	0	29.8	0.031	R	NQMYCVILK	G				Rodrigo_ingel_1.1349.1349.2.dta	emPAI	0.04

## Sheet: In Gel band 2 MASCOT output
Header	--------------------------------------------------------
Search title	in_gel_2_glossina_28/05/13
Timestamp	2013-05-28T14:11:59Z
User	Clair
Email	c.rose@liv.ac.uk
Report URI	http://lstmmaldi.liv.ac.uk/mascot/cgi/master_results.pl?file=../data/20130528/F001971.dat
Peak list data path	ingel2merge.mgf
Peak list format	Mascot generic
Search type	MIS
Mascot version	2.4.1
Database	140513_glossina
Fasta file	140513_glossina_.fasta
Total sequences	12457
Total residues	6887013
Sequences after taxonomy filter	12457
Number of queries	1549
Decoy	--------------------------------------------------------
Number of matches above identity threshold in search of real database	1
Number of matches above identity threshold in search of decoy database	2
Number of matches above homology threshold in search of real database	5
Number of matches above homology threshold in search of decoy database	3
Fixed modifications	--------------------------------------------------------
Identifier	Name	Delta	Neutral loss
1	Carbamidomethyl (C)	57.0215
Variable modifications	--------------------------------------------------------
Identifier	Name	Delta	Neutral loss(es)
1	Oxidation (M)	15.9949	0	63.9983
Search Parameters	--------------------------------------------------------
Taxonomy filter	All entries
Enzyme	Trypsin
Maximum Missed Cleavages	1
Fixed modifications	Carbamidomethyl (C)
Quantitation method	None
Variable modifications	Oxidation (M)
Peptide Mass Tolerance	0.6
Peptide Mass Tolerance Units	Da
Fragment Mass Tolerance	0.6
Fragment Mass Tolerance Units	Da
Mass values	Monoisotopic
Instrument type	ESI-TRAP
Isotope error mode	0
Decoy database also searched	1
Format parameters	--------------------------------------------------------
Significance threshold	0.05
Max. number of hits	0
Use MudPIT protein scoring	1
Ions score cut-off	0
Include same-set proteins	0
Include sub-set proteins	1
Include unassigned	0
Require bold red	0
Use homology threshold	1
Group protein families	1
Re-score using Percolator	0
Protein hits	--------------------------------------------------------
prot_hit_num	prot_family_member	prot_acc	prot_desc	prot_score	prot_mass	prot_matches	prot_matches_sig	prot_sequences	prot_sequences_sig	pep_query	pep_rank	pep_isbold	pep_isunique	pep_exp_mz	pep_exp_mr	pep_exp_z	pep_calc_mr	pep_delta	pep_miss	pep_score	pep_expect	pep_res_before	pep_seq	pep_res_after	pep_var_mod	pep_var_mod_pos	pep_summed_mod_pos	pep_scan_title
1	1	GMOY007640-PA	hypothetical protein|protein_coding|scf7180000650570:16738-35160:1|gene:GMOY007640	22	69054	3	2	1	1	1028	1	1	1	697.379	1392.74	2	1392.72	0.0267	1	16.68	0.027	K	KSAEELMLELSK	E	Oxidation (M)	0.000000100000.0		Rodrigo_ingel_2.854.854.2.dta
1	1	GMOY007640-PA	hypothetical protein|protein_coding|scf7180000650570:16738-35160:1|gene:GMOY007640	22	69054	3	2	1	1	1029	1	1	1	465.262	1392.77	3	1392.72	0.0487	1	22.46	0.03	K	KSAEELMLELSK	E	Oxidation (M)	0.000000100000.0		Rodrigo_ingel_2.850.850.3.dta
1	1	GMOY007640-PA	hypothetical protein|protein_coding|scf7180000650570:16738-35160:1|gene:GMOY007640	22	69054	3	2	1	1	1031	1	1	1	465.28	1392.82	3	1392.72	0.1007	1	17.34	0.11	K	KSAEELMLELSK	E	Oxidation (M)	0.000000100000.0		Rodrigo_ingel_2.843.843.3.dta	emPAI	0.11
2	1	GMOY004194-PA	hypothetical protein|protein_coding|scf7180000647995:216299-217837:-1|gene:GMOY004194	22	55796	2	1	1	1	993	1	1	1	634.302	1266.59	2	1266.75	-0.165	1	15.86	0.091	R	LGLGPVKEDVIK	L				Rodrigo_ingel_2.840.840.2.dta
2	1	GMOY004194-PA	hypothetical protein|protein_coding|scf7180000647995:216299-217837:-1|gene:GMOY004194	22	55796	2	1	1	1	994	1	1	1	634.341	1266.67	2	1266.75	-0.087	1	21.91	0.025	R	LGLGPVKEDVIK	L				Rodrigo_ingel_2.829.829.2.dta	emPAI	0.07
3	1	GMOY009181-PA	hypothetical protein|protein_coding|scf7180000651781:38445-44757:-1|gene:GMOY009181	15	42795	1	1	1	1	761	1	1	1	825.981	824.974	1	825.402	-0.4284	0	15.05	0.039	K	NGYPTFK	Q				Rodrigo_ingel_2.45.45.1.dta	emPAI	0.08
4	1	GMOY008669-PA	hypothetical protein|protein_coding|scf7180000651496:41401-45679:1|gene:GMOY008669	13	160432	2	1	2	1	1319	1	1	1	736.921	2207.74	3	2208.03	-0.2936	0	13.12	0.059	K	LSTLAEVETSCPAFHFMPR	F	Oxidation (M)	0.0000000000000000100.0		Rodrigo_ingel_2.3458.3458.3.dta
4	1	GMOY008669-PA	hypothetical protein|protein_coding|scf7180000651496:41401-45679:1|gene:GMOY008669	13	160432	2	1	2	1	1368	2	1	1	797.202	2388.58	3	2388.04	0.5452	0	0.15	1	R	IHPDLWHNDPGEMNDGPLCR	C	Oxidation (M)	0.00000000000010000000.0		Rodrigo_ingel_2.794.794.3.dta	emPAI	0.02

## Sheet: In Gel band 3 MASCOT output
	Header	--------------------------------------------------------
	Search title	in_gel_3_glossina_28/05/13
	Timestamp	2013-05-28T14:21:47Z
	User	Clair
	Email	c.rose@liv.ac.uk
	Report URI	http://lstmmaldi.liv.ac.uk/mascot/cgi/master_results.pl?file=../data/20130528/F001972.dat
	Peak list data path	ingel3merge.mgf
	Peak list format	Mascot generic
	Search type	MIS
	Mascot version	2.4.1
	Database	140513_glossina
	Fasta file	140513_glossina_.fasta
	Total sequences	12457
	Total residues	6887013
	Sequences after taxonomy filter	12457
	Number of queries	760
	Decoy	--------------------------------------------------------
	Number of matches above identity threshold in search of real database	3
	Number of matches above identity threshold in search of decoy database	5
	Number of matches above homology threshold in search of real database	9
	Number of matches above homology threshold in search of decoy database	5
	Fixed modifications	--------------------------------------------------------
	Identifier	Name	Delta	Neutral loss
	1	Carbamidomethyl (C)	57.0215
	Variable modifications	--------------------------------------------------------
	Identifier	Name	Delta	Neutral loss(es)
	1	Oxidation (M)	15.9949	0	63.9983
	Search Parameters	--------------------------------------------------------
	Taxonomy filter	All entries
	Enzyme	Trypsin
	Maximum Missed Cleavages	1
	Fixed modifications	Carbamidomethyl (C)
	Quantitation method	None
	Variable modifications	Oxidation (M)
	Peptide Mass Tolerance	0.6
	Peptide Mass Tolerance Units	Da
	Fragment Mass Tolerance	0.6
	Fragment Mass Tolerance Units	Da
	Mass values	Monoisotopic
	Instrument type	ESI-TRAP
	Isotope error mode	0
	Decoy database also searched	1
	Format parameters	--------------------------------------------------------
	Significance threshold	0.05
	Max. number of hits	0
	Use MudPIT protein scoring	1
	Ions score cut-off	0
	Include same-set proteins	0
	Include sub-set proteins	1
	Include unassigned	0
	Require bold red	0
	Use homology threshold	1
	Group protein families	1
	Re-score using Percolator	0
	Protein hits	--------------------------------------------------------
	prot_hit_num	prot_family_member	prot_acc	prot_desc	prot_score	prot_mass	prot_matches	prot_matches_sig	prot_sequences	prot_sequences_sig	pep_query	pep_rank	pep_isbold	pep_isunique	pep_exp_mz	pep_exp_mr	pep_exp_z	pep_calc_mr	pep_delta	pep_miss	pep_score	pep_expect	pep_res_before	pep_seq	pep_res_after	pep_var_mod	pep_var_mod_pos	pep_summed_mod_pos	pep_scan_title
	1	1	GMOY002708-PA	hypothetical protein|protein_coding|scf7180000644279:138091-144189:-1|gene:GMOY002708	38	67871	1	1	1	1	652	1	1	1	748.242	1494.47	2	1494.66	-0.1875	0	38.48	0.001	R	CPLGQWYDSDVR	L				3.1553.1553.2.dta	emPAI	0.05
	2	1	GMOY009892-PA	hypothetical protein|protein_coding|scf7180000651939:4969-13729:-1|gene:GMOY009892	37	315004	3	1	3	1	79	1	1	1	475.465	474.458	1	474.28	0.1775	0	1.55	3.5	K	ATGVK	Q				3.1731.1731.1.dta
	2	1	GMOY009892-PA	hypothetical protein|protein_coding|scf7180000651939:4969-13729:-1|gene:GMOY009892	37	315004	3	1	3	1	351	1	1	1	515.198	1028.38	2	1028.59	-0.2049	0	37.11	0.0069	K	DELVLTIAR	N				3.1495.1495.2.dta
	2	1	GMOY009892-PA	hypothetical protein|protein_coding|scf7180000651939:4969-13729:-1|gene:GMOY009892	37	315004	3	1	3	1	358	6	1	1	522.56	1043.1	2	1043.6	-0.4928	0	1.77	1.6	K	ILTLVNSER	I				3.3033.3033.2.dta	emPAI	0.01
	3	1	GMOY009248-PA	hypothetical protein|protein_coding|scf7180000651825:69055-72933:-1|gene:GMOY009248	29	70982	4	1	1	1	372	1	1	1	533.199	1064.38	2	1064.56	-0.1737	1	15.31	0.87	R	STLSTGRTSR	S				3.1056.1056.2.dta
	3	1	GMOY009248-PA	hypothetical protein|protein_coding|scf7180000651825:69055-72933:-1|gene:GMOY009248	29	70982	4	1	1	1	374	1	1	1	533.201	1064.39	2	1064.56	-0.1707	1	27.34	0.062	R	STLSTGRTSR	S				3.937.937.2.dta
	3	1	GMOY009248-PA	hypothetical protein|protein_coding|scf7180000651825:69055-72933:-1|gene:GMOY009248	29	70982	4	1	1	1	375	1	1	1	533.202	1064.39	2	1064.56	-0.1687	1	29.34	0.039	R	STLSTGRTSR	S				3.940.940.2.dta
	3	1	GMOY009248-PA	hypothetical protein|protein_coding|scf7180000651825:69055-72933:-1|gene:GMOY009248	29	70982	4	1	1	1	377	1	1	1	533.222	1064.43	2	1064.56	-0.1287	1	16.1	0.82	R	STLSTGRTSR	S				3.1063.1063.2.dta	emPAI	0.05
	4	1	GMOY007474-PA	hypothetical protein|protein_coding|scf7180000650411:238482-249521:-1|gene:GMOY007474	28	159694	1	1	1	1	342	1	1	1	502.239	1002.46	2	1002.53	-0.0718	0	28.22	0.058	K	ESLTEGIVR	H				3.944.944.2.dta	emPAI	0.02
	5	1	GMOY007524-PA	hypothetical protein|protein_coding|scf7180000650446:20437-22718:-1|gene:GMOY007524	28	64560	2	2	1	1	487	1	1	1	616.738	1231.46	2	1231.66	-0.2026	1	26.74	0.026	R	TRTAGLSGNTVR	T				3.912.912.2.dta
	5	1	GMOY007524-PA	hypothetical protein|protein_coding|scf7180000650446:20437-22718:-1|gene:GMOY007524	28	64560	2	2	1	1	488	1	1	1	616.74	1231.46	2	1231.66	-0.1986	1	25.25	0.053	R	TRTAGLSGNTVR	T				3.919.919.2.dta	emPAI	0.06
	6	1	GMOY007640-PA	hypothetical protein|protein_coding|scf7180000650570:16738-35160:1|gene:GMOY007640	27	69054	6	2	1	1	593	1	1	1	465.201	1392.58	3	1392.72	-0.1363	1	12.1	0.22	K	KSAEELMLELSK	E	Oxidation (M)	0.000000100000.0		3.1294.1294.3.dta
	6	1	GMOY007640-PA	hypothetical protein|protein_coding|scf7180000650570:16738-35160:1|gene:GMOY007640	27	69054	6	2	1	1	594	1	1	1	697.321	1392.63	2	1392.72	-0.0903	1	17.5	0.12	K	KSAEELMLELSK	E	Oxidation (M)	0.000000100000.0		3.1117.1117.2.dta
	6	1	GMOY007640-PA	hypothetical protein|protein_coding|scf7180000650570:16738-35160:1|gene:GMOY007640	27	69054	6	2	1	1	595	1	1	1	697.321	1392.63	2	1392.72	-0.0903	1	26.05	0.015	K	KSAEELMLELSK	E	Oxidation (M)	0.000000100000.0		3.1110.1110.2.dta
	6	1	GMOY007640-PA	hypothetical protein|protein_coding|scf7180000650570:16738-35160:1|gene:GMOY007640	27	69054	6	2	1	1	596	1	1	1	465.22	1392.64	3	1392.72	-0.0783	1	20.67	0.042	K	KSAEELMLELSK	E	Oxidation (M)	0.000000100000.0		3.1115.1115.3.dta
	6	1	GMOY007640-PA	hypothetical protein|protein_coding|scf7180000650570:16738-35160:1|gene:GMOY007640	27	69054	6	2	1	1	597	1	1	1	465.222	1392.64	3	1392.72	-0.0733	1	11.73	0.56	K	KSAEELMLELSK	E	Oxidation (M)	0.000000100000.0		3.1175.1175.3.dta
	6	1	GMOY007640-PA	hypothetical protein|protein_coding|scf7180000650570:16738-35160:1|gene:GMOY007640	27	69054	6	2	1	1	598	1	1	1	465.24	1392.7	3	1392.72	-0.0183	1	15.24	0.14	K	KSAEELMLELSK	E	Oxidation (M)	0.000000100000.0		3.1108.1108.3.dta	emPAI	0.11
	7	1	GMOY011773-PA	hypothetical protein|protein_coding|scf7180000652170:18794781-18853236:-1|gene:GMOY011773	24	497990	2	1	1	1	668	1	1	1	522.618	1564.83	3	1564.82	0.0095	0	24.35	0.011	R	WTRPGDRPLPAGSR	D				3.954.954.3.dta
	7	1	GMOY011773-PA	hypothetical protein|protein_coding|scf7180000652170:18794781-18853236:-1|gene:GMOY011773	24	497990	2	1	1	1	669	1	1	1	392.219	1564.85	4	1564.82	0.0245	0	14.41	0.094	R	WTRPGDRPLPAGSR	D				3.958.958.4.dta	emPAI	0.01
	8	1	GMOY007567-PA	hypothetical protein|protein_coding|scf7180000650503:1576-6611:1|gene:GMOY007567	23	147341	2	1	2	1	385	5	1	1	541.739	1081.46	2	1081.57	-0.1031	1	1.88	3.6	K	FRELFQSR	F				3.1404.1404.2.dta
	8	1	GMOY007567-PA	hypothetical protein|protein_coding|scf7180000650503:1576-6611:1|gene:GMOY007567	23	147341	2	1	2	1	409	1	1	1	556.218	1110.42	2	1110.69	-0.2666	1	23.44	0.038	K	ISLSPVIARR	I				3.1292.1292.2.dta	emPAI	0.03
	9	1	GMOY004221-PA	hypothetical protein|protein_coding|scf7180000648002:297-980:1|gene:GMOY004221	16	26592	1	1	1	1	641	1	1	1	744.28	1486.55	2	1486.69	-0.1456	1	15.95	0.035	R	DPDHGGINRYTSR	F				3.1719.1719.2.dta	emPAI	0.14

## Sheet: In Gel band 4 MASCOT output
Header	--------------------------------------------------------
Search title	in_gel_4_glossina_28/05/13
Timestamp	2013-05-28T14:59:10Z
User	Clair
Email	c.rose@liv.ac.uk
Report URI	http://lstmmaldi.liv.ac.uk/mascot/cgi/master_results.pl?file=../data/20130528/F001973.dat
Peak list data path	ingel4merge.mgf
Peak list format	Mascot generic
Search type	MIS
Mascot version	2.4.1
Database	140513_glossina
Fasta file	140513_glossina_.fasta
Total sequences	12457
Total residues	6887013
Sequences after taxonomy filter	12457
Number of queries	1567
Decoy	--------------------------------------------------------
Number of matches above identity threshold in search of real database	5
Number of matches above identity threshold in search of decoy database	2
Number of matches above homology threshold in search of real database	8
Number of matches above homology threshold in search of decoy database	3
Fixed modifications	--------------------------------------------------------
Identifier	Name	Delta	Neutral loss
1	Carbamidomethyl (C)	57.0215
Variable modifications	--------------------------------------------------------
Identifier	Name	Delta	Neutral loss(es)
1	Oxidation (M)	15.9949	0	63.9983
Search Parameters	--------------------------------------------------------
Taxonomy filter	All entries
Enzyme	Trypsin
Maximum Missed Cleavages	1
Fixed modifications	Carbamidomethyl (C)
Quantitation method	None
Variable modifications	Oxidation (M)
Peptide Mass Tolerance	0.6
Peptide Mass Tolerance Units	Da
Fragment Mass Tolerance	0.6
Fragment Mass Tolerance Units	Da
Mass values	Monoisotopic
Instrument type	ESI-TRAP
Isotope error mode	0
Decoy database also searched	1
Format parameters	--------------------------------------------------------
Significance threshold	0.05
Max. number of hits	0
Use MudPIT protein scoring	1
Ions score cut-off	0
Include same-set proteins	0
Include sub-set proteins	1
Include unassigned	0
Require bold red	0
Use homology threshold	1
Group protein families	1
Re-score using Percolator	0
Protein hits	--------------------------------------------------------
prot_hit_num	prot_family_member	prot_acc	prot_desc	prot_score	prot_mass	prot_matches	prot_matches_sig	prot_sequences	prot_sequences_sig	pep_query	pep_rank	pep_isbold	pep_isunique	pep_exp_mz	pep_exp_mr	pep_exp_z	pep_calc_mr	pep_delta	pep_miss	pep_score	pep_expect	pep_res_before	pep_seq	pep_res_after	pep_var_mod	pep_var_mod_pos	pep_summed_mod_pos	pep_scan_title
1	1	GMOY011773-PA	hypothetical protein|protein_coding|scf7180000652170:18794781-18853236:-1|gene:GMOY011773	98	497990	4	2	3	1	526	1	1	1	698.91	697.903	1	697.314	0.5884	0	8.1	0.49	R	VDDGHR	H				Rodrigo_ingel_4.1267.1267.1.dta
1	1	GMOY011773-PA	hypothetical protein|protein_coding|scf7180000652170:18794781-18853236:-1|gene:GMOY011773	98	497990	4	2	3	1	874	1	1	1	541.219	1080.42	2	1080.55	-0.1224	0	64.3	1.2e-05	R	LSYIEATER	E				Rodrigo_ingel_4.945.945.2.dta
1	1	GMOY011773-PA	hypothetical protein|protein_coding|scf7180000652170:18794781-18853236:-1|gene:GMOY011773	98	497990	4	2	3	1	875	1	1	1	541.28	1080.54	2	1080.55	-0.0004	0	61.64	2.3e-05	R	LSYIEATER	E				Rodrigo_ingel_4.948.948.2.dta
1	1	GMOY011773-PA	hypothetical protein|protein_coding|scf7180000652170:18794781-18853236:-1|gene:GMOY011773	98	497990	4	2	3	1	1402	6	1	1	848.052	2541.13	3	2541.1	0.0293	0	1.89	1.5	R	DDYEPDRPTSRPSTPPDYDYR	T				Rodrigo_ingel_4.80.80.3.dta	emPAI	0.01
2	1	GMOY000463-PA	hypothetical protein|protein_coding|scf7180000639890:5427-20602:-1|gene:GMOY000463	23	250542	5	1	3	1	860	1	1	1	532.702	1063.39	2	1063.53	-0.1435	0	22.81	0.024	K	SIGEVMSIGR	N	Oxidation (M)	0.0000010000.0		Rodrigo_ingel_4.479.479.2.dta
2	1	GMOY000463-PA	hypothetical protein|protein_coding|scf7180000639890:5427-20602:-1|gene:GMOY000463	23	250542	5	1	3	1	913	8	1	1	404.039	1209.1	3	1209.59	-0.4929	0	0.41	3.8	K	AMMSTGFQIPK	K				Rodrigo_ingel_4.3265.3265.3.dta
2	1	GMOY000463-PA	hypothetical protein|protein_coding|scf7180000639890:5427-20602:-1|gene:GMOY000463	23	250542	5	1	3	1	920	1	1	1	404.118	1209.33	3	1209.59	-0.2579	0	0.49	0.9	K	AMMSTGFQIPK	K				Rodrigo_ingel_4.3307.3307.3.dta
2	1	GMOY000463-PA	hypothetical protein|protein_coding|scf7180000639890:5427-20602:-1|gene:GMOY000463	23	250542	5	1	3	1	923	1	1	1	404.161	1209.46	3	1209.59	-0.1289	0	6.1	0.88	K	AMMSTGFQIPK	K				Rodrigo_ingel_4.3232.3232.3.dta
2	1	GMOY000463-PA	hypothetical protein|protein_coding|scf7180000639890:5427-20602:-1|gene:GMOY000463	23	250542	5	1	3	1	1195	3	1	1	606.84	1817.5	3	1818	-0.4973	1	0.42	1.3	K	IELLPAIKDLAQMGYK	L	Oxidation (M)	0.0000000000001000.0		Rodrigo_ingel_4.455.455.3.dta	emPAI	0.01
3	1	GMOY012195-PA	hypothetical protein|protein_coding|scf7180000642438:111181-112437:1|gene:GMOY012195	19	45830	2	1	1	1	914	2	1	1	404.039	1209.1	3	1209.59	-0.4967	1	8.61	1.1	R	ETRAMAGGVFR	I	Oxidation (M)	0.00001000000.0		Rodrigo_ingel_4.3274.3274.3.dta
3	1	GMOY012195-PA	hypothetical protein|protein_coding|scf7180000642438:111181-112437:1|gene:GMOY012195	19	45830	2	1	1	1	919	1	1	1	404.101	1209.28	3	1209.59	-0.3107	1	18.99	0.019	R	ETRAMAGGVFR	I	Oxidation (M)	0.00001000000.0		Rodrigo_ingel_4.3367.3367.3.dta	emPAI	0.08
4	1	GMOY007524-PA	hypothetical protein|protein_coding|scf7180000650446:20437-22718:-1|gene:GMOY007524	18	64560	1	1	1	1	931	1	1	1	616.779	1231.54	2	1231.66	-0.1206	1	17.96	0.046	R	TRTAGLSGNTVR	T				Rodrigo_ingel_4.705.705.2.dta	emPAI	0.06

## Sheet: In Gel band 5 MASCOT output
Header	--------------------------------------------------------
Search title	in_gel_5_glossina_28/05/13
Timestamp	2013-05-28T15:10:20Z
User	Clair
Email	c.rose@liv.ac.uk
Report URI	http://lstmmaldi.liv.ac.uk/mascot/cgi/master_results.pl?file=../data/20130528/F001974.dat
Peak list data path	ingel5merge.mgf
Peak list format	Mascot generic
Search type	MIS
Mascot version	2.4.1
Database	140513_glossina
Fasta file	140513_glossina_.fasta
Total sequences	12457
Total residues	6887013
Sequences after taxonomy filter	12457
Number of queries	1538
Decoy	--------------------------------------------------------
Number of matches above identity threshold in search of real database	3
Number of matches above identity threshold in search of decoy database	1
Number of matches above homology threshold in search of real database	5
Number of matches above homology threshold in search of decoy database	4
Fixed modifications	--------------------------------------------------------
Identifier	Name	Delta	Neutral loss
1	Carbamidomethyl (C)	57.0215
Variable modifications	--------------------------------------------------------
Identifier	Name	Delta	Neutral loss(es)
1	Oxidation (M)	15.9949	0	63.9983
Search Parameters	--------------------------------------------------------
Taxonomy filter	All entries
Enzyme	Trypsin
Maximum Missed Cleavages	1
Fixed modifications	Carbamidomethyl (C)
Quantitation method	None
Variable modifications	Oxidation (M)
Peptide Mass Tolerance	0.6
Peptide Mass Tolerance Units	Da
Fragment Mass Tolerance	0.6
Fragment Mass Tolerance Units	Da
Mass values	Monoisotopic
Instrument type	ESI-TRAP
Isotope error mode	0
Decoy database also searched	1
Format parameters	--------------------------------------------------------
Significance threshold	0.05
Max. number of hits	0
Use MudPIT protein scoring	1
Ions score cut-off	0
Include same-set proteins	0
Include sub-set proteins	1
Include unassigned	0
Require bold red	0
Use homology threshold	1
Group protein families	1
Re-score using Percolator	0
Protein hits	--------------------------------------------------------
prot_hit_num	prot_family_member	prot_acc	prot_desc	prot_score	prot_mass	prot_matches	prot_matches_sig	prot_sequences	prot_sequences_sig	pep_query	pep_rank	pep_isbold	pep_isunique	pep_exp_mz	pep_exp_mr	pep_exp_z	pep_calc_mr	pep_delta	pep_miss	pep_score	pep_expect	pep_res_before	pep_seq	pep_res_after	pep_var_mod	pep_var_mod_pos	pep_summed_mod_pos	pep_scan_title
1	1	GMOY011667-PA	hypothetical protein|protein_coding|scf7180000652170:11619494-11620045:1|gene:GMOY011667	20	20438	1	1	1	1	1422	1	1	1	919.38	2755.12	3	2755.37	-0.2521	1	19.89	0.041	K	IKEVYSTGYVMVGMSFVLAAMLAMI	-	2 Oxidation (M)	0.0000000000100000000000010.0		Rodrigo_ingel_5.70.70.3.dta	emPAI	0.19
2	1	GMOY002709-PA	hypothetical protein|protein_coding|scf7180000644279:173379-195899:-1|gene:GMOY002709	15	180586	1	1	1	1	1532	1	1	1	848.268	3389.04	4	3388.71	0.3278	0	15.49	0.035	R	TPPMDPVDFSGPPRPLGFGLVGHIGGPRPYSR	E	Oxidation (M)	0.00010000000000000000000000000000.0		Rodrigo_ingel_5.1944.1944.4.dta	emPAI	0.02

## Sheet: in Gel band 6 MASCOT output
Header	--------------------------------------------------------
Search title	in_gel_6_glossina_28/05/13
Timestamp	2013-05-28T15:57:30Z
User	Clair
Email	c.rose@liv.ac.uk
Report URI	http://lstmmaldi.liv.ac.uk/mascot/cgi/master_results.pl?file=../data/20130528/F001975.dat
Peak list data path	ingel 6merge.mgf
Peak list format	Mascot generic
Search type	MIS
Mascot version	2.4.1
Database	140513_glossina
Fasta file	140513_glossina_.fasta
Total sequences	12457
Total residues	6887013
Sequences after taxonomy filter	12457
Number of queries	1629
Decoy	--------------------------------------------------------
Number of matches above identity threshold in search of real database	6
Number of matches above identity threshold in search of decoy database	2
Number of matches above homology threshold in search of real database	8
Number of matches above homology threshold in search of decoy database	3
Fixed modifications	--------------------------------------------------------
Identifier	Name	Delta	Neutral loss
1	Carbamidomethyl (C)	57.0215
Variable modifications	--------------------------------------------------------
Identifier	Name	Delta	Neutral loss(es)
1	Oxidation (M)	15.9949	0	63.9983
Search Parameters	--------------------------------------------------------
Taxonomy filter	All entries
Enzyme	Trypsin
Maximum Missed Cleavages	1
Fixed modifications	Carbamidomethyl (C)
Quantitation method	None
Variable modifications	Oxidation (M)
Peptide Mass Tolerance	0.6
Peptide Mass Tolerance Units	Da
Fragment Mass Tolerance	0.6
Fragment Mass Tolerance Units	Da
Mass values	Monoisotopic
Instrument type	ESI-TRAP
Isotope error mode	0
Decoy database also searched	1
Format parameters	--------------------------------------------------------
Significance threshold	0.05
Max. number of hits	0
Use MudPIT protein scoring	1
Ions score cut-off	0
Include same-set proteins	0
Include sub-set proteins	1
Include unassigned	0
Require bold red	0
Use homology threshold	1
Group protein families	1
Re-score using Percolator	0
Protein hits	--------------------------------------------------------
prot_hit_num	prot_family_member	prot_acc	prot_desc	prot_score	prot_mass	prot_matches	prot_matches_sig	prot_sequences	prot_sequences_sig	pep_query	pep_rank	pep_isbold	pep_isunique	pep_exp_mz	pep_exp_mr	pep_exp_z	pep_calc_mr	pep_delta	pep_miss	pep_score	pep_expect	pep_res_before	pep_seq	pep_res_after	pep_var_mod	pep_var_mod_pos	pep_summed_mod_pos	pep_scan_title
1	1	GMOY001776-PA	hypothetical protein|protein_coding|scf7180000642081:269290-271349:-1|gene:GMOY001776	105	42191	5	4	3	2	894	1	1	1	566.759	1131.5	2	1131.52	-0.0169	0	62.37	1.9e-05	R	GYSFTTTAER	E				Rodrigo_ingel_6.927.927.2.dta
1	1	GMOY001776-PA	hypothetical protein|protein_coding|scf7180000642081:269290-271349:-1|gene:GMOY001776	105	42191	5	4	3	2	895	1	1	1	566.783	1131.55	2	1131.52	0.0311	0	45.26	0.00053	R	GYSFTTTAER	E				Rodrigo_ingel_6.922.922.2.dta
1	1	GMOY001776-PA	hypothetical protein|protein_coding|scf7180000642081:269290-271349:-1|gene:GMOY001776	105	42191	5	4	3	2	939	1	1	1	599.879	1197.74	2	1197.7	0.0445	0	41.58	0.0008	R	AVFPSIVGRPR	H				Rodrigo_ingel_6.1060.1060.2.dta
1	1	GMOY001776-PA	hypothetical protein|protein_coding|scf7180000642081:269290-271349:-1|gene:GMOY001776	105	42191	5	4	3	2	940	1	1	1	599.899	1197.78	2	1197.7	0.0845	0	29.75	0.0094	R	AVFPSIVGRPR	H				Rodrigo_ingel_6.1078.1078.2.dta
1	1	GMOY001776-PA	hypothetical protein|protein_coding|scf7180000642081:269290-271349:-1|gene:GMOY001776	105	42191	5	4	3	2	1261	1	1	1	651.978	1952.91	3	1953.06	-0.1444	0	5.42	0.31	R	VAPEEHPVLLTEAPLNPK	A				Rodrigo_ingel_6.1190.1190.3.dta	emPAI	0.19
2	1	GMOY011773-PA	hypothetical protein|protein_coding|scf7180000652170:18794781-18853236:-1|gene:GMOY011773	68	497990	5	1	4	1	751	4	1	1	426.199	850.384	2	850.412	-0.0282	1	8.3	1.5	R	CAPGYKR	N				Rodrigo_ingel_6.885.885.2.dta
2	1	GMOY011773-PA	hypothetical protein|protein_coding|scf7180000652170:18794781-18853236:-1|gene:GMOY011773	68	497990	5	1	4	1	752	1	1	1	426.202	850.389	2	850.412	-0.0232	1	13.71	0.57	R	CAPGYKR	N				Rodrigo_ingel_6.878.878.2.dta
2	1	GMOY011773-PA	hypothetical protein|protein_coding|scf7180000652170:18794781-18853236:-1|gene:GMOY011773	68	497990	5	1	4	1	1059	1	1	1	717.312	1432.61	2	1432.66	-0.0454	0	67.76	2.8e-06	R	CDNGQCINILAR	C				Rodrigo_ingel_6.1209.1209.2.dta
2	1	GMOY011773-PA	hypothetical protein|protein_coding|scf7180000652170:18794781-18853236:-1|gene:GMOY011773	68	497990	5	1	4	1	1069	2	1	1	733.453	1464.89	2	1464.7	0.1886	1	2.89	1.1	K	SGEDLTMIHYRK	T	Oxidation (M)	0.000000100000.0		Rodrigo_ingel_6.66.66.2.dta
2	1	GMOY011773-PA	hypothetical protein|protein_coding|scf7180000652170:18794781-18853236:-1|gene:GMOY011773	68	497990	5	1	4	1	1273	1	1	1	674.775	2021.3	3	2020.98	0.3259	1	1.89	0.92	R	CQYIEHLNENSLAFKR	N				Rodrigo_ingel_6.1300.1300.3.dta	emPAI	0.01
3	1	GMOY000516-PA	hypothetical protein|protein_coding|scf7180000639967:137449-140488:1|gene:GMOY000516	43	104622	1	1	1	1	796	1	1	1	478.279	954.544	2	954.485	0.0593	0	42.82	0.0017	-	MFSVGSLAK	V	Oxidation (M)	0.100000000.0		Rodrigo_ingel_6.831.831.2.dta	emPAI	0.04
4	1	GMOY006421-PA	hypothetical protein|protein_coding|scf7180000649019:13496-26594:1|gene:GMOY006421	26	40585	2	1	1	1	1102	1	1	1	752.342	1502.67	2	1502.74	-0.0708	1	26.35	0.0071	R	YFLKEGDTDLFR	I				Rodrigo_ingel_6.1349.1349.2.dta
4	1	GMOY006421-PA	hypothetical protein|protein_coding|scf7180000649019:13496-26594:1|gene:GMOY006421	26	40585	2	1	1	1	1103	1	1	1	752.36	1502.7	2	1502.74	-0.0358	1	13.65	0.28	R	YFLKEGDTDLFR	I				Rodrigo_ingel_6.1354.1354.2.dta	emPAI	0.09
5	1	GMOY007640-PA	hypothetical protein|protein_coding|scf7180000650570:16738-35160:1|gene:GMOY007640	20	69054	3	1	1	1	1040	1	1	1	465.262	1392.76	3	1392.72	0.0477	1	15.06	0.18	K	KSAEELMLELSK	E	Oxidation (M)	0.000000100000.0		Rodrigo_ingel_6.859.859.3.dta
5	1	GMOY007640-PA	hypothetical protein|protein_coding|scf7180000650570:16738-35160:1|gene:GMOY007640	20	69054	3	1	1	1	1041	1	1	1	697.399	1392.78	2	1392.72	0.0667	1	20.16	0.034	K	KSAEELMLELSK	E	Oxidation (M)	0.000000100000.0		Rodrigo_ingel_6.868.868.2.dta
5	1	GMOY007640-PA	hypothetical protein|protein_coding|scf7180000650570:16738-35160:1|gene:GMOY007640	20	69054	3	1	1	1	1042	1	1	1	465.278	1392.81	3	1392.72	0.0957	1	18.38	0.22	K	KSAEELMLELSK	E	Oxidation (M)	0.000000100000.0		Rodrigo_ingel_6.864.864.3.dta	emPAI	0.05

## Sheet: In Gel band 7 MASCOT output
Header	--------------------------------------------------------
Search title	in_gel_7_glossina_28/05/13
Timestamp	2013-05-28T16:05:36Z
User	Clair
Email	c.rose@liv.ac.uk
Report URI	http://lstmmaldi.liv.ac.uk/mascot/cgi/master_results.pl?file=../data/20130528/F001976.dat
Peak list data path	ingel7merge.mgf
Peak list format	Mascot generic
Search type	MIS
Mascot version	2.4.1
Database	140513_glossina
Fasta file	140513_glossina_.fasta
Total sequences	12457
Total residues	6887013
Sequences after taxonomy filter	12457
Number of queries	1619
Decoy	--------------------------------------------------------
Number of matches above identity threshold in search of real database	4
Number of matches above identity threshold in search of decoy database	2
Number of matches above homology threshold in search of real database	7
Number of matches above homology threshold in search of decoy database	4
Fixed modifications	--------------------------------------------------------
Identifier	Name	Delta	Neutral loss
1	Carbamidomethyl (C)	57.0215
Variable modifications	--------------------------------------------------------
Identifier	Name	Delta	Neutral loss(es)
1	Oxidation (M)	15.9949	0	63.9983
Search Parameters	--------------------------------------------------------
Taxonomy filter	All entries
Enzyme	Trypsin
Maximum Missed Cleavages	1
Fixed modifications	Carbamidomethyl (C)
Quantitation method	None
Variable modifications	Oxidation (M)
Peptide Mass Tolerance	0.6
Peptide Mass Tolerance Units	Da
Fragment Mass Tolerance	0.6
Fragment Mass Tolerance Units	Da
Mass values	Monoisotopic
Instrument type	ESI-TRAP
Isotope error mode	0
Decoy database also searched	1
Format parameters	--------------------------------------------------------
Significance threshold	0.05
Max. number of hits	0
Use MudPIT protein scoring	1
Ions score cut-off	0
Include same-set proteins	0
Include sub-set proteins	1
Include unassigned	0
Require bold red	0
Use homology threshold	1
Group protein families	1
Re-score using Percolator	0
Protein hits	--------------------------------------------------------
prot_hit_num	prot_family_member	prot_acc	prot_desc	prot_score	prot_mass	prot_matches	prot_matches_sig	pep_query	pep_rank	pep_isbold	pep_isunique	pep_exp_mz	pep_exp_mr	pep_exp_z	pep_calc_mr	pep_delta	pep_miss	pep_score	pep_expect	pep_res_before	pep_seq	pep_res_after	pep_var_mod	pep_scan_title
1	1	GMOY003590-PA	hypothetical protein|protein_coding|scf7180000646704:2284-21224:1|gene:GMOY003590	61	233319	2	2	700	1	1	1	566.302	1130.59	2	1130.62	-0.0309	0	51.52	0.00012	R	GLLGPPGPPGGGR	G		Rodrigo_ingel_7.1081.1081.2.dta
1	1	GMOY003590-PA	hypothetical protein|protein_coding|scf7180000646704:2284-21224:1|gene:GMOY003590	61	233319	2	2	701	1	1	1	566.32	1130.63	2	1130.62	0.0061	0	35.22	0.0068	R	GLLGPPGPPGGGR	G		Rodrigo_ingel_7.1090.1090.2.dta	emPAI	0.02
2	1	GMOY011773-PA	hypothetical protein|protein_coding|scf7180000652170:18794781-18853236:-1|gene:GMOY011773	56	497990	3	2	1110	7	1	1	650.523	1948.55	3	1949.01	-0.4611	0	4	2.5	R	GSQERPITDRPPDNVIR	T		Rodrigo_ingel_7.222.222.3.dta
2	1	GMOY011773-PA	hypothetical protein|protein_coding|scf7180000652170:18794781-18853236:-1|gene:GMOY011773	56	497990	3	2	1160	1	1	1	698.058	2091.15	3	2091.17	-0.0164	1	16.76	0.027	K	YTTLRVRPTRPSPPTPPR	E		Rodrigo_ingel_7.2028.2028.3.dta	emPAI	0.01
2	1	GMOY011773-PA	hypothetical protein|protein_coding|scf7180000652170:18794781-18853236:-1|gene:GMOY011773	56	497990	3	2	684	1	1	1	541.259	1080.5	2	1080.55	-0.0414	0	59.77	3.5e-05	R	LSYIEATER	E		Rodrigo_ingel_7.987.987.2.dta
3	1	GMOY007524-PA	hypothetical protein|protein_coding|scf7180000650446:20437-22718:-1|gene:GMOY007524	22	64560	2	2	760	1	1	1	616.819	1231.62	2	1231.66	-0.0396	1	23.11	0.051	R	TRTAGLSGNTVR	T		Rodrigo_ingel_7.726.726.2.dta	emPAI	0.06
3	1	GMOY007524-PA	hypothetical protein|protein_coding|scf7180000650446:20437-22718:-1|gene:GMOY007524	22	64560	2	2	759	1	1	1	616.78	1231.54	2	1231.66	-0.1186	1	19.7	0.052	R	TRTAGLSGNTVR	T		Rodrigo_ingel_7.717.717.2.dta
4	1	GMOY006421-PA	hypothetical protein|protein_coding|scf7180000649019:13496-26594:1|gene:GMOY006421	20	40585	2	1	903	1	1	1	752.342	1502.67	2	1502.74	-0.0718	1	11.28	0.39	R	YFLKEGDTDLFR	I		Rodrigo_ingel_7.1368.1368.2.dta
4	1	GMOY006421-PA	hypothetical protein|protein_coding|scf7180000649019:13496-26594:1|gene:GMOY006421	20	40585	2	1	904	1	1	1	752.379	1502.74	2	1502.74	0.0032	1	19.85	0.024	R	YFLKEGDTDLFR	I		Rodrigo_ingel_7.1361.1361.2.dta	emPAI	0.09
5	1	GMOY005703-PA	hypothetical protein|protein_coding|scf7180000648716:31353-60252:-1|gene:GMOY005703	18	269181	1	1	1043	1	1	1	888.339	1774.66	2	1774.74	-0.0727	1	17.57	0.022	R	GREEQAEQDGEEEGGR	V		Rodrigo_ingel_7.584.584.2.dta	emPAI	0.01

[truncated: 23 more sheets: In Gel band 8 MASCOT output, In Gel band 9 MASCOT output, In Gel band 10 MASCOT output, In Gel band 11 MASCOT output, In Gel band 12 MASCOT output, In Gel band 13 MASCOT output, In Gel band 14 MASCOT output, In Gel band 15 MASCOT output, In Gel band 16 MASCOT output, In Gel band 17 MASCOT output, In Gel band 18 MASCOT output, In Gel band 19 MASCOT output, In Gel band 20 MASCOT output, In Gel band 21 MASCOT output, In Gel band 22 MASCOT output, In Gel band 23 MASCOT output, In Gel band 24 MASCOT output, In Gel band 25 MASCOT output, In Gel band 26 MASCOT output, In Gel band 27 MASCOT output …]
